# Supplementary material for: Perfluoroalkyl Chain Length Effect on Crystal Packing and [LnO8] Coordination Geometry in Lanthanide-Lithium β-Diketonates: Luminescence and Single-Ion Magnet Behavior
Source: MDPI journal article supplement (doi:10.3390/ijms24119778), 2023-06-05

# checkCIF/PLATON report

Structure factors have been supplied for datablock(s) 2\_a

THIS REPORT IS FOR GUIDANCE ONLY. IF USED AS PART OF A REVIEW PROCEDURE FOR PUBLICATION, IT SHOULD NOT REPLACE THE EXPERTISE OF AN EXPERIENCED CRYSTALLOGRAPHIC REFEREE.

No syntax errors found.      CIF dictionary      Interpreting this report

## Datablock: 2\_a

---

Bond precision:    C-C = 0.0048 A

Wavelength=0.71073

Cell:                a=10.6905(6)                b=14.5385(8)                c=22.0395(12)  
                      alpha=102.861(2)        beta=98.191(2)        gamma=105.287(2)  
Temperature:    100 K

|                | Calculated            | Reported              |
|----------------|-----------------------|-----------------------|
| Volume         | 3146.8(3)             | 3146.8(3)             |
| Space group    | P -1                  | P -1                  |
| Hall group     | -P 1                  | -P 1                  |
| Moiety formula | C45 H44 F36 Li O17 Tb | C45 H44 F36 Li O17 Tb |
| Sum formula    | C45 H44 F36 Li O17 Tb | C45 H44 F36 Li O17 Tb |
| Mr             | 1706.67               | 1706.66               |
| Dx,g cm-3      | 1.801                 | 1.801                 |
| Z              | 2                     | 2                     |
| Mu (mm-1)      | 1.294                 | 1.294                 |
| F000           | 1684.0                | 1684.0                |
| F000'          | 1685.36               |                       |
| h,k,lmax       | 14,19,29              | 14,19,29              |
| Nref           | 15632                 | 15503                 |
| Tmin,Tmax      | 0.856,0.974           | 0.572,0.746           |
| Tmin'          | 0.824                 |                       |

Correction method= # Reported T Limits: Tmin=0.572 Tmax=0.746  
AbsCorr = MULTI-SCAN

Data completeness= 0.992

Theta(max)= 28.282

R(reflections)= 0.0368( 14046)

wR2(reflections)= 0.0936( 15503)

S = 1.052

Npar= 969

---

The following ALERTS were generated. Each ALERT has the format

**test-name\_ALERT\_alert-type\_alert-level.**

Click on the hyperlinks for more details of the test.

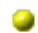

### Alert level C

|                   |                                               |            |
|-------------------|-----------------------------------------------|------------|
| PLAT230_ALERT_2_C | Hirshfeld Test Diff for F24 --C32 .           | 6.3 s.u.   |
| PLAT911_ALERT_3_C | Missing FCF Refl Between Thmin & STh/L= 0.600 | 114 Report |
| PLAT971_ALERT_2_C | Check Calcd Resid. Dens. 1.10A From F27       | 1.97 eA-3  |
| PLAT971_ALERT_2_C | Check Calcd Resid. Dens. 1.26A From F26       | 1.85 eA-3  |
| PLAT971_ALERT_2_C | Check Calcd Resid. Dens. 1.01A From O4        | 1.61 eA-3  |

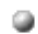

### Alert level G

|                   |                                                  |              |
|-------------------|--------------------------------------------------|--------------|
| PLAT002_ALERT_2_G | Number of Distance or Angle Restraints on AtSite | 4 Note       |
| PLAT083_ALERT_2_G | SHELXL Second Parameter in WGHT Unusually Large  | 5.96 Why ?   |
| PLAT154_ALERT_1_G | The s.u.'s on the Cell Angles are Equal ..(Note) | 0.002 Degree |
| PLAT171_ALERT_4_G | The CIF-Embedded .res File Contains EADP Records | 1 Report     |
| PLAT172_ALERT_4_G | The CIF-Embedded .res File Contains DFIX Records | 1 Report     |
| PLAT173_ALERT_4_G | The CIF-Embedded .res File Contains DANG Records | 2 Report     |
| PLAT242_ALERT_2_G | Low 'MainMol' Ueq as Compared to Neighbors of    | C11 Check    |
| PLAT242_ALERT_2_G | Low 'MainMol' Ueq as Compared to Neighbors of    | C20 Check    |
| PLAT242_ALERT_2_G | Low 'MainMol' Ueq as Compared to Neighbors of    | C22 Check    |
| PLAT242_ALERT_2_G | Low 'MainMol' Ueq as Compared to Neighbors of    | C33 Check    |
| PLAT242_ALERT_2_G | Low 'MainMol' Ueq as Compared to Neighbors of    | C44 Check    |
| PLAT301_ALERT_3_G | Main Residue Disorder .....(Resd 1 )             | 6% Note      |
| PLAT434_ALERT_2_G | Short Inter HL..HL Contact F9 ..F19              | 2.80 Ang.    |
|                   | 1+x,1+y,z =                                      | 1_665 Check  |
| PLAT793_ALERT_4_G | Model has Chirality at C4 (Centro SPGR)          | R Verify     |
| PLAT793_ALERT_4_G | Model has Chirality at C37B (Centro SPGR)        | R Verify     |
| PLAT793_ALERT_4_G | Model has Chirality at C37A (Centro SPGR)        | S Verify     |
| PLAT794_ALERT_5_G | Tentative Bond Valency for Tb1 (III) .           | 3.35 Info    |
| PLAT860_ALERT_3_G | Number of Least-Squares Restraints .....         | 3 Note       |
| PLAT910_ALERT_3_G | Missing # of FCF Reflection(s) Below Theta(Min). | 3 Note       |
| PLAT912_ALERT_4_G | Missing # of FCF Reflections Above STh/L= 0.600  | 12 Note      |
| PLAT933_ALERT_2_G | Number of OMIT Records in Embedded .res File ... | 2 Note       |
| PLAT978_ALERT_2_G | Number C-C Bonds with Positive Residual Density. | 0 Info       |

- 0 **ALERT level A** = Most likely a serious problem - resolve or explain  
0 **ALERT level B** = A potentially serious problem, consider carefully  
5 **ALERT level C** = Check. Ensure it is not caused by an omission or oversight  
22 **ALERT level G** = General information/check it is not something unexpected

- 1 ALERT type 1 CIF construction/syntax error, inconsistent or missing data  
14 ALERT type 2 Indicator that the structure model may be wrong or deficient  
4 ALERT type 3 Indicator that the structure quality may be low  
7 ALERT type 4 Improvement, methodology, query or suggestion  
1 ALERT type 5 Informative message, check

It is advisable to attempt to resolve as many as possible of the alerts in all categories. Often the minor alerts point to easily fixed oversights, errors and omissions in your CIF or refinement strategy, so attention to these fine details can be worthwhile. In order to resolve some of the more serious problems it may be necessary to carry out additional measurements or structure refinements. However, the purpose of your study may justify the reported deviations and the more serious of these should normally be commented upon in the discussion or experimental section of a paper or in the "special\_details" fields of the CIF. checkCIF was carefully designed to identify outliers and unusual parameters, but every test has its limitations and alerts that are not important in a particular case may appear. Conversely, the absence of alerts does not guarantee there are no aspects of the results needing attention. It is up to the individual to critically assess their own results and, if necessary, seek expert advice.

### **Publication of your CIF in IUCr journals**

A basic structural check has been run on your CIF. These basic checks will be run on all CIFs submitted for publication in IUCr journals (*Acta Crystallographica*, *Journal of Applied Crystallography*, *Journal of Synchrotron Radiation*); however, if you intend to submit to *Acta Crystallographica Section C* or *E* or *IUCrData*, you should make sure that full publication checks are run on the final version of your CIF prior to submission.

### **Publication of your CIF in other journals**

Please refer to the *Notes for Authors* of the relevant journal for any special instructions relating to CIF submission.

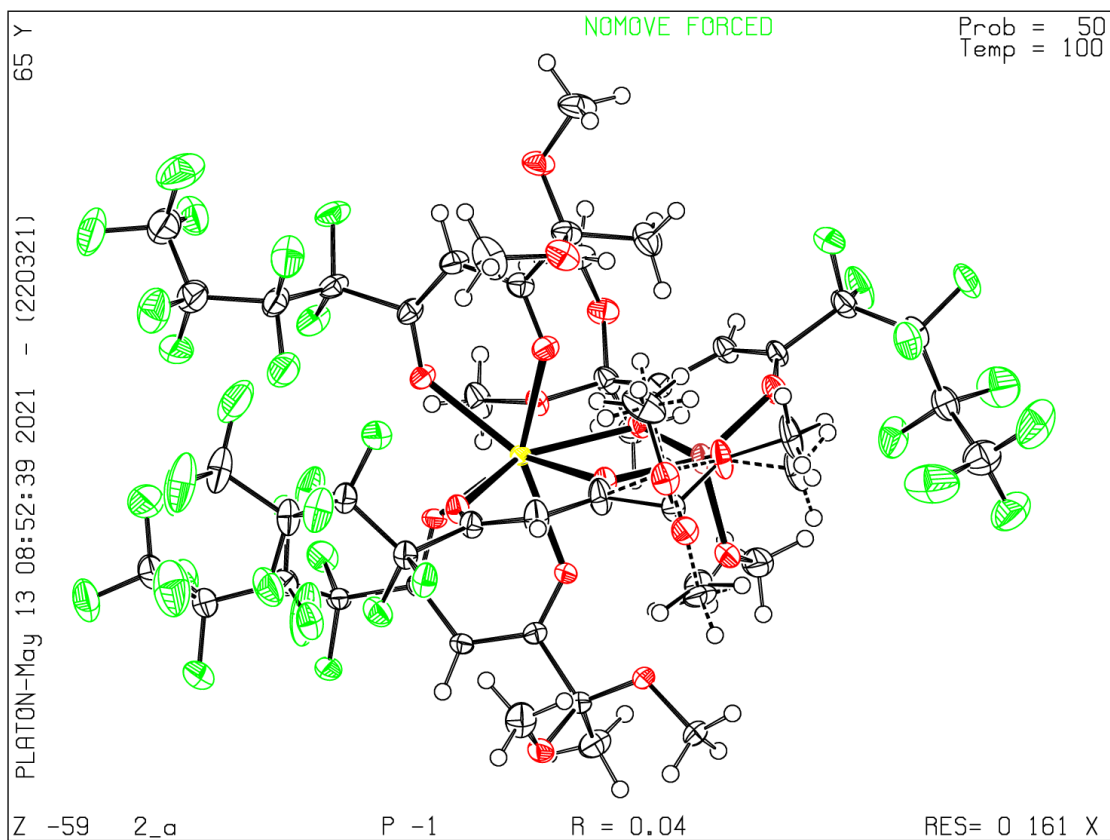

Supplement: s1 [file s1]
