# Supplementary material for: Perfluoroalkyl Chain Length Effect on Crystal Packing and [LnO8] Coordination Geometry in Lanthanide-Lithium β-Diketonates: Luminescence and Single-Ion Magnet Behavior
Source: MDPI journal article supplement (doi:10.3390/ijms24119778), 2023-06-05

```

Bond precision:   C-C = 0.0049 Å                               Wavelength=0.71073

Cell:             a=10.4696(13)      b=13.756(2)      c=22.417(3)
                  alpha=98.181(5)    beta=100.306(5)   gamma=90.527(6)
Temperature:      100 K

                  Calculated                      Reported
Volume            3142.1(7)                      3142.1(8)
Space group       P -1                          P -1
Hall group        -P 1                          -P 1
Moiety formula    C45 H44 F36 Gd Li O17          C45 H44 F36 Gd Li O16.68,
                                                         0.32(O)
Sum formula       C45 H44 F36 Gd Li O17          C45 H44 F36 Gd Li O17
Mr                1704.99                        1704.99
Dx,g cm-3         1.802                         1.802
Z                 2                             2
Mu (mm-1)         1.226                         1.226
F000              1682.0                        1682.0
F000'             1683.37
h,k,lmax          16,21,34                      15,20,34
Nref              23998                         21278
Tmin,Tmax         0.863,0.907                   0.592,0.747
Tmin'             0.736

Correction method= # Reported T Limits: Tmin=0.592 Tmax=0.747
AbsCorr = MULTI SCAN

Data completeness= 0.887                               Theta(max)= 33.164

R(reflections)= 0.0453( 18791)                        wR2(reflections)=
                                                         0.1184( 21278)
S = 1.050                               Npar= 956

```

---

The following ALERTS were generated. Each ALERT has the format

**test-name\_ALERT\_alert-type\_alert-level.**

Click on the hyperlinks for more details of the test.

---

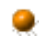

#### Alert level B

PLAT971\_ALERT\_2\_B Check Calcd Resid. Dens. 1.26Ang From F28 2.66 eA-3

---

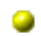

#### Alert level C

PLAT220\_ALERT\_2\_C NonSolvent Resd 1 C Ueq(max)/Ueq(min) Range 4.0 Ratio  
PLAT220\_ALERT\_2\_C NonSolvent Resd 1 F Ueq(max)/Ueq(min) Range 4.6 Ratio  
PLAT230\_ALERT\_2\_C Hirshfeld Test Diff for F5 --C6 . 6.3 s.u.  
PLAT230\_ALERT\_2\_C Hirshfeld Test Diff for C8 --C11 . 7.0 s.u.  
PLAT230\_ALERT\_2\_C Hirshfeld Test Diff for C41 --C44 . 7.0 s.u.  
PLAT242\_ALERT\_2\_C Low 'MainMol' Ueq as Compared to Neighbors of C6 Check  
PLAT767\_ALERT\_4\_C INS Embedded LIST 6 Instruction Should be LIST 4 Please Check  
PLAT911\_ALERT\_3\_C Missing FCF Refl Between Thmin & STh/L= 0.600 74 Report  
PLAT971\_ALERT\_2\_C Check Calcd Resid. Dens. 1.00Ang From F35 2.15 eA-3  
PLAT971\_ALERT\_2\_C Check Calcd Resid. Dens. 1.57Ang From F30 1.90 eA-3  
PLAT971\_ALERT\_2\_C Check Calcd Resid. Dens. 1.15Ang From C37 1.55 eA-3  
PLAT977\_ALERT\_2\_C Check Negative Difference Density on H17 . -0.34 eA-3

---

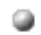

#### Alert level G

PLAT002\_ALERT\_2\_G Number of Distance or Angle Restraints on AtSite 13 Note  
PLAT003\_ALERT\_2\_G Number of Uiso or Uij Restrained non-H Atoms ... 12 Report  
PLAT083\_ALERT\_2\_G SHELXL Second Parameter in WGHT Unusually Large 6.61 Why ?  
PLAT172\_ALERT\_4\_G The CIF-Embedded .res File Contains DFIX Records 1 Report  
PLAT173\_ALERT\_4\_G The CIF-Embedded .res File Contains DANG Records 2 Report  
PLAT176\_ALERT\_4\_G The CIF-Embedded .res File Contains SADI Records 3 Report  
PLAT177\_ALERT\_4\_G The CIF-Embedded .res File Contains DELU Records 3 Report  
PLAT186\_ALERT\_4\_G The CIF-Embedded .res File Contains ISOR Records 5 Report  
PLAT192\_ALERT\_3\_G A Non-default DELU Restraint Value for First Par 0.0080 Report  
PLAT192\_ALERT\_3\_G A Non-default DELU Restraint Value for SecondPar 0.0160 Report  
PLAT192\_ALERT\_3\_G A Non-default DELU Restraint Value for First Par 0.0050 Report  
PLAT192\_ALERT\_3\_G A Non-default DELU Restraint Value for First Par 0.0080 Report  
PLAT192\_ALERT\_3\_G A Non-default DELU Restraint Value for SecondPar 0.0160 Report  
PLAT230\_ALERT\_2\_G Hirshfeld Test Diff for F9B --C7 . 5.1 s.u.  
PLAT230\_ALERT\_2\_G Hirshfeld Test Diff for O16 --C41 . 10.5 s.u.  
PLAT242\_ALERT\_2\_G Low 'MainMol' Ueq as Compared to Neighbors of C7 Check  
PLAT242\_ALERT\_2\_G Low 'MainMol' Ueq as Compared to Neighbors of C18 Check  
PLAT242\_ALERT\_2\_G Low 'MainMol' Ueq as Compared to Neighbors of C29 Check  
PLAT242\_ALERT\_2\_G Low 'MainMol' Ueq as Compared to Neighbors of C40 Check  
PLAT301\_ALERT\_3\_G Main Residue Disorder .....(Resd 1 ) 4% Note  
PLAT311\_ALERT\_2\_G Isolated Disordered Oxygen Atom (No H's ?) ..... 04A Check  
PLAT311\_ALERT\_2\_G Isolated Disordered Oxygen Atom (No H's ?) ..... 016A Check  
PLAT431\_ALERT\_2\_G Short Inter HL..A Contact F36 ..O16A . 2.66 Ang.  
1-x,-y,1-z = 2\_656 Check  
PLAT434\_ALERT\_2\_G Short Inter HL..HL Contact F11 ..F32 . 2.83 Ang.  
x,1+y,z = 1\_565 Check  
PLAT434\_ALERT\_2\_G Short Inter HL..HL Contact F15 ..F34 . 2.83 Ang.  
1+x,1+y,z = 1\_665 Check  
PLAT434\_ALERT\_2\_G Short Inter HL..HL Contact F34 ..F35 . 2.71 Ang.  
-x,-y,1-z = 2\_556 Check

|                   |                                                  |               |       |             |
|-------------------|--------------------------------------------------|---------------|-------|-------------|
| PLAT434_ALERT_2_G | Short Inter HL..HL Contact F34                   | ..F34         | .     | 2.71 Ang.   |
|                   |                                                  | -x,-y,1-z =   | 2_556 | Check       |
| PLAT720_ALERT_4_G | Number of Unusual/Non-Standard Labels            | .....         |       | 4 Note      |
| PLAT793_ALERT_4_G | Model has Chirality at C8                        | (Centro SPGR) |       | R Verify    |
| PLAT793_ALERT_4_G | Model has Chirality at C41                       | (Centro SPGR) |       | S Verify    |
| PLAT794_ALERT_5_G | Tentative Bond Valency for Gd1                   | (III)         | .     | 3.46 Info   |
| PLAT860_ALERT_3_G | Number of Least-Squares Restraints               | .....         |       | 112 Note    |
| PLAT883_ALERT_1_G | No Info/Value for _atom_sites_solution_primary   | .             |       | Please Do ! |
| PLAT910_ALERT_3_G | Missing # of FCF Reflection(s) Below Theta(Min). |               |       | 3 Note      |
| PLAT912_ALERT_4_G | Missing # of FCF Reflections Above STh/L=        | 0.600         |       | 2583 Note   |
| PLAT933_ALERT_2_G | Number of HKL-OMIT Records in Embedded .res File |               |       | 4 Note      |
| PLAT941_ALERT_3_G | Average HKL Measurement Multiplicity             | .....         |       | 1.8 Low     |
| PLAT978_ALERT_2_G | Number C-C Bonds with Positive Residual Density. |               |       | 0 Info      |

---

0 **ALERT level A** = Most likely a serious problem - resolve or explain  
 1 **ALERT level B** = A potentially serious problem, consider carefully  
 12 **ALERT level C** = Check. Ensure it is not caused by an omission or oversight  
 38 **ALERT level G** = General information/check it is not something unexpected

1 ALERT type 1 CIF construction/syntax error, inconsistent or missing data  
 29 ALERT type 2 Indicator that the structure model may be wrong or deficient  
 10 ALERT type 3 Indicator that the structure quality may be low  
 10 ALERT type 4 Improvement, methodology, query or suggestion  
 1 ALERT type 5 Informative message, check

---

It is advisable to attempt to resolve as many as possible of the alerts in all categories. Often the minor alerts point to easily fixed oversights, errors and omissions in your CIF or refinement strategy, so attention to these fine details can be worthwhile. In order to resolve some of the more serious problems it may be necessary to carry out additional measurements or structure refinements. However, the purpose of your study may justify the reported deviations and the more serious of these should normally be commented upon in the discussion or experimental section of a paper or in the "special\_details" fields of the CIF. checkCIF was carefully designed to identify outliers and unusual parameters, but every test has its limitations and alerts that are not important in a particular case may appear. Conversely, the absence of alerts does not guarantee there are no aspects of the results needing attention. It is up to the individual to critically assess their own results and, if necessary, seek expert advice.

### **Publication of your CIF in IUCr journals**

A basic structural check has been run on your CIF. These basic checks will be run on all CIFs submitted for publication in IUCr journals (*Acta Crystallographica*, *Journal of Applied Crystallography*, *Journal of Synchrotron Radiation*); however, if you intend to submit to *Acta Crystallographica Section C* or *E* or *IUCrData*, you should make sure that full publication checks are run on the final version of your CIF prior to submission.

### **Publication of your CIF in other journals**

Please refer to the *Notes for Authors* of the relevant journal for any special instructions relating to CIF submission.

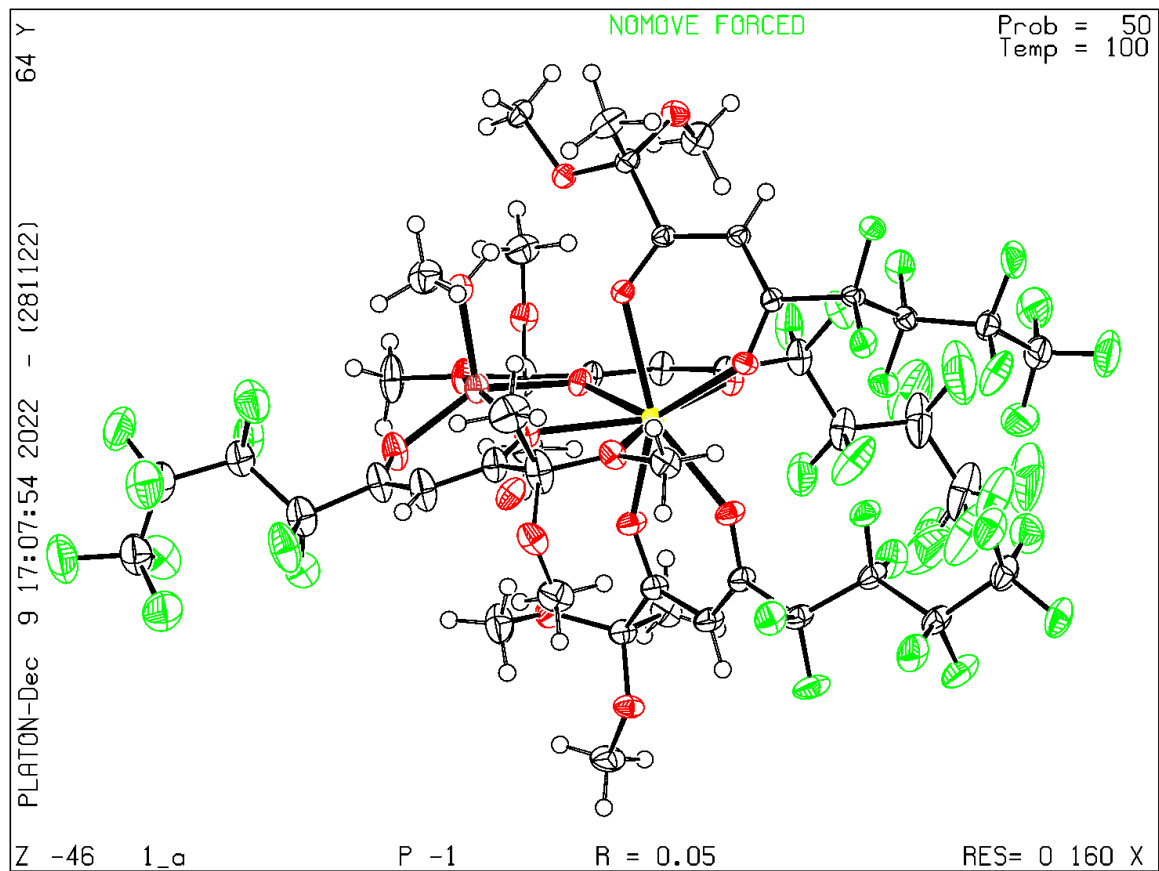

Supplement: s1 [file s1]
