# Supplementary material for: Perfluoroalkyl Chain Length Effect on Crystal Packing and [LnO8] Coordination Geometry in Lanthanide-Lithium β-Diketonates: Luminescence and Single-Ion Magnet Behavior
Source: MDPI journal article supplement (doi:10.3390/ijms24119778), 2023-06-05

# checkCIF/PLATON report

Structure factors have been supplied for datablock(s) 2

THIS REPORT IS FOR GUIDANCE ONLY. IF USED AS PART OF A REVIEW PROCEDURE FOR PUBLICATION, IT SHOULD NOT REPLACE THE EXPERTISE OF AN EXPERIENCED CRYSTALLOGRAPHIC REFEREE.

No syntax errors found.      CIF dictionary      Interpreting this report

## Datablock: 2

---

Bond precision:    C-C = 0.0038 Å

Wavelength=0.71073

Cell:                a=10.5787(19)                b=12.147(3)                c=22.571(5)  
                      alpha=98.146(14)        beta=98.089(9)        gamma=94.347(7)  
Temperature:        100 K

|                | Calculated                               | Reported                                |
|----------------|------------------------------------------|-----------------------------------------|
| Volume         | 2828.9(11)                               | 2829.0(10)                              |
| Space group    | P -1                                     | P -1                                    |
| Hall group     | -P 1                                     | -P 1                                    |
| Moiety formula | C40.67 H44 Eu F27.01 Li O17, 0.328(C F3) | C40.67 H44 Eu F27.02 Li O17, 0.33(C F3) |
| Sum formula    | C41 H44 Eu F28 Li O17                    | C41 H44 Eu F28 Li O17                   |
| Mr             | 1499.65                                  | 1499.66                                 |
| Dx,g cm-3      | 1.761                                    | 1.761                                   |
| Z              | 2                                        | 2                                       |
| Mu (mm-1)      | 1.265                                    | 1.265                                   |
| F000           | 1488.0                                   | 1488.0                                  |
| F000'          | 1489.09                                  |                                         |
| h,k,lmax       | 15,17,32                                 | 15,17,32                                |
| Nref           | 17259                                    | 16954                                   |
| Tmin,Tmax      | 0.796,0.927                              | 0.588,0.746                             |
| Tmin'          | 0.776                                    |                                         |

Correction method= # Reported T Limits: Tmin=0.588 Tmax=0.746

AbsCorr = MULTI-SCAN

Data completeness= 0.982

Theta(max)= 30.508

R(reflections)= 0.0376( 15536)

wR2(reflections)= 0.0978( 16954)

S = 1.063

Npar= 884

---

The following ALERTS were generated. Each ALERT has the format

**test-name\_ALERT\_alert-type\_alert-level.**

Click on the hyperlinks for more details of the test.

### Alert level C

|                   |                                         |                             |           |       |        |
|-------------------|-----------------------------------------|-----------------------------|-----------|-------|--------|
| PLAT213_ALERT_2_C | Atom C40                                | has ADP max/min Ratio       | .....     | 3.3   | oblate |
| PLAT213_ALERT_2_C | Atom C40A                               | has ADP max/min Ratio       | .....     | 3.3   | oblate |
| PLAT220_ALERT_2_C | NonSolvent Resd 1 C                     | Ueq(max)/Ueq(min) Range     |           | 4.2   | Ratio  |
| PLAT222_ALERT_3_C | NonSolvent Resd 1 H                     | Uiso(max)/Uiso(min) Range   |           | 4.7   | Ratio  |
| PLAT242_ALERT_2_C | Low 'MainMol' Ueq                       | as Compared to Neighbors of |           | 017   | Check  |
| PLAT309_ALERT_2_C | Single Bonded Oxygen (C-O > 1.3 Ang)    |                             | .....     | 03A   | Check  |
| PLAT309_ALERT_2_C | Single Bonded Oxygen (C-O > 1.3 Ang)    |                             | .....     | 08A   | Check  |
| PLAT309_ALERT_2_C | Single Bonded Oxygen (C-O > 1.3 Ang)    |                             | .....     | 015   | Check  |
| PLAT911_ALERT_3_C | Missing FCF Refl Between Thmin & STh/L= | 0.600                       |           | 80    | Report |
| PLAT971_ALERT_2_C | Check Calcd Resid. Dens.                | 0.31A                       | From C40  | 1.96  | eA-3   |
| PLAT972_ALERT_2_C | Check Calcd Resid. Dens.                | 0.13A                       | From F11A | -1.86 | eA-3   |

### Alert level G

FORMU01\_ALERT\_1\_G There is a discrepancy between the atom counts in the  
 \_chemical\_formula\_sum and \_chemical\_formula\_moiety. This is  
 usually due to the moiety formula being in the wrong format.  
 Atom count from \_chemical\_formula\_sum: C41 H44 Eu1 F28 Lil O17  
 Atom count from \_chemical\_formula\_moiety:C41 H44 Eu1 F28.01 Lil O17

|                   |                                                  |               |   |        |              |
|-------------------|--------------------------------------------------|---------------|---|--------|--------------|
| PLAT002_ALERT_2_G | Number of Distance or Angle Restraints on AtSite |               |   | 30     | Note         |
| PLAT042_ALERT_1_G | Calc. and Reported MoietyFormula Strings Differ  |               |   |        | Please Check |
| PLAT171_ALERT_4_G | The CIF-Embedded .res File Contains EADP Records |               |   | 9      | Report       |
| PLAT172_ALERT_4_G | The CIF-Embedded .res File Contains DFIX Records |               |   | 1      | Report       |
| PLAT173_ALERT_4_G | The CIF-Embedded .res File Contains DANG Records |               |   | 2      | Report       |
| PLAT176_ALERT_4_G | The CIF-Embedded .res File Contains SADI Records |               |   | 9      | Report       |
| PLAT230_ALERT_2_G | Hirshfeld Test Diff for F10                      | --C38         | . | 6.0    | s.u.         |
| PLAT230_ALERT_2_G | Hirshfeld Test Diff for F10A                     | --C38         | . | 7.0    | s.u.         |
| PLAT230_ALERT_2_G | Hirshfeld Test Diff for F11                      | --C39         | . | 11.7   | s.u.         |
| PLAT230_ALERT_2_G | Hirshfeld Test Diff for O15                      | --C36A        | . | 9.5    | s.u.         |
| PLAT230_ALERT_2_G | Hirshfeld Test Diff for C34A                     | --C36A        | . | 7.7    | s.u.         |
| PLAT242_ALERT_2_G | Low 'MainMol' Ueq as Compared to Neighbors of    |               |   | C10    | Check        |
| PLAT242_ALERT_2_G | Low 'MainMol' Ueq as Compared to Neighbors of    |               |   | C20    | Check        |
| PLAT242_ALERT_2_G | Low 'MainMol' Ueq as Compared to Neighbors of    |               |   | C30    | Check        |
| PLAT301_ALERT_3_G | Main Residue Disorder .....                      | (Resd 1 )     |   | 22%    | Note         |
| PLAT302_ALERT_4_G | Anion/Solvent/Minor-Residue Disorder (Resd 2 )   |               |   | 100%   | Note         |
| PLAT304_ALERT_4_G | Non-Integer Number of Atoms in .....             | (Resd 1 )     |   | 130.69 | Check        |
| PLAT304_ALERT_4_G | Non-Integer Number of Atoms in .....             | (Resd 2 )     |   | 1.31   | Check        |
| PLAT412_ALERT_2_G | Short Intra XH3 .. XHn                           | H35B ..H37A   | . | 2.06   | Ang.         |
|                   |                                                  | x,y,z =       |   | 1_555  | Check        |
| PLAT431_ALERT_2_G | Short Inter HL..A Contact F5A                    | ..08A         | . | 2.88   | Ang.         |
|                   |                                                  | 1-x,2-y,2-z = |   | 2_677  | Check        |
| PLAT432_ALERT_2_G | Short Inter X...Y Contact F12J                   | ..C41         |   | 2.76   | Ang.         |
|                   |                                                  | x,-1+y,z =    |   | 1_545  | Check        |
| PLAT434_ALERT_2_G | Short Inter HL..HL Contact F6A                   | ..F6A         |   | 2.71   | Ang.         |
|                   |                                                  | 2-x,2-y,2-z = |   | 2_777  | Check        |
| PLAT434_ALERT_2_G | Short Inter HL..HL Contact F8A                   | ..F12J        |   | 2.63   | Ang.         |
|                   |                                                  | x,y,z =       |   | 1_555  | Check        |
| PLAT434_ALERT_2_G | Short Inter HL..HL Contact F9A                   | ..F12B        |   | 2.77   | Ang.         |
|                   |                                                  | -1+x,y,z =    |   | 1_455  | Check        |
| PLAT793_ALERT_4_G | Model has Chirality at C14                       | (Centro SPGR) |   | R      | Verify       |
| PLAT793_ALERT_4_G | Model has Chirality at C34A                      | (Centro SPGR) |   | S      | Verify       |
| PLAT793_ALERT_4_G | Model has Chirality at C34                       | (Centro SPGR) |   | R      | Verify       |
| PLAT860_ALERT_3_G | Number of Least-Squares Restraints .....         |               |   | 225    | Note         |
| PLAT883_ALERT_1_G | No Info/Value for _atom_sites_solution_primary   |               |   |        | Please Do !  |
| PLAT910_ALERT_3_G | Missing # of FCF Reflection(s) Below Theta(Min). |               |   | 2      | Note         |

|                   |                                                  |     |      |
|-------------------|--------------------------------------------------|-----|------|
| PLAT912_ALERT_4_G | Missing # of FCF Reflections Above STh/L= 0.600  | 224 | Note |
| PLAT913_ALERT_3_G | Missing # of Very Strong Reflections in FCF .... | 3   | Note |
| PLAT933_ALERT_2_G | Number of OMIT Records in Embedded .res File ... | 1   | Note |
| PLAT941_ALERT_3_G | Average HKL Measurement Multiplicity .....       | 1.8 | Low  |
| PLAT978_ALERT_2_G | Number C-C Bonds with Positive Residual Density. | 0   | Info |

---

|    |                      |                                                              |
|----|----------------------|--------------------------------------------------------------|
| 0  | <b>ALERT level A</b> | = Most likely a serious problem - resolve or explain         |
| 0  | <b>ALERT level B</b> | = A potentially serious problem, consider carefully          |
| 11 | <b>ALERT level C</b> | = Check. Ensure it is not caused by an omission or oversight |
| 36 | <b>ALERT level G</b> | = General information/check it is not something unexpected   |
| 3  | <b>ALERT type 1</b>  | CIF construction/syntax error, inconsistent or missing data  |
| 26 | <b>ALERT type 2</b>  | Indicator that the structure model may be wrong or deficient |
| 7  | <b>ALERT type 3</b>  | Indicator that the structure quality may be low              |
| 11 | <b>ALERT type 4</b>  | Improvement, methodology, query or suggestion                |
| 0  | <b>ALERT type 5</b>  | Informative message, check                                   |

---

It is advisable to attempt to resolve as many as possible of the alerts in all categories. Often the minor alerts point to easily fixed oversights, errors and omissions in your CIF or refinement strategy, so attention to these fine details can be worthwhile. In order to resolve some of the more serious problems it may be necessary to carry out additional measurements or structure refinements. However, the purpose of your study may justify the reported deviations and the more serious of these should normally be commented upon in the discussion or experimental section of a paper or in the "special\_details" fields of the CIF. checkCIF was carefully designed to identify outliers and unusual parameters, but every test has its limitations and alerts that are not important in a particular case may appear. Conversely, the absence of alerts does not guarantee there are no aspects of the results needing attention. It is up to the individual to critically assess their own results and, if necessary, seek expert advice.

### Publication of your CIF in IUCr journals

A basic structural check has been run on your CIF. These basic checks will be run on all CIFs submitted for publication in IUCr journals (*Acta Crystallographica*, *Journal of Applied Crystallography*, *Journal of Synchrotron Radiation*); however, if you intend to submit to *Acta Crystallographica Section C* or *E* or *IUCrData*, you should make sure that full publication checks are run on the final version of your CIF prior to submission.

### Publication of your CIF in other journals

Please refer to the *Notes for Authors* of the relevant journal for any special instructions relating to CIF submission.

---

**PLATON version of 05/12/2020; check.def file version of 05/12/2020**

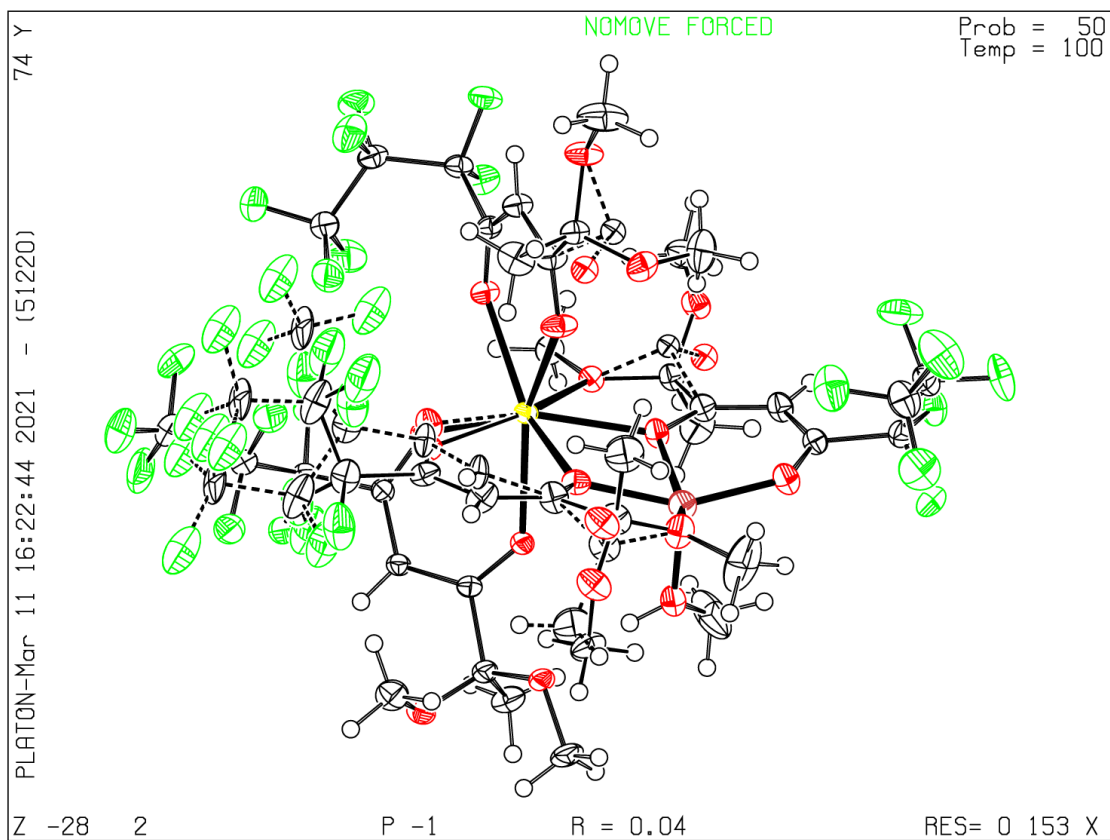

Supplement: s1 [file s1]
