# Supplementary material for: Perfluoroalkyl Chain Length Effect on Crystal Packing and [LnO8] Coordination Geometry in Lanthanide-Lithium β-Diketonates: Luminescence and Single-Ion Magnet Behavior
Source: MDPI journal article supplement (doi:10.3390/ijms24119778), 2023-06-05

```

Bond precision:   C-C = 0.0065 Å                               Wavelength=0.71073

Cell:             a=10.609(5)           b=12.079(4)           c=22.527(6)
                  alpha=99.318(9)       beta=98.930(12)        gamma=94.48(2)
Temperature:      100 K

                  Calculated                               Reported
Volume            2798.3(18)                               2798.3(18)
Space group       P -1                                     P -1
Hall group        -P 1                                     -P 1
Moiety formula    C41 H44 F28 Gd Li O17                  C41 H44 F28 Gd Li O16.68,
                                                           0.32(O)
Sum formula       C41 H44 F28 Gd Li O17                  C41 H44 F28 Gd Li O17
Mr                1504.95                                  1504.95
Dx,g cm-3         1.786                                    1.786
Z                 2                                         2
Mu (mm-1)         1.343                                    1.343
F000              1490.0                                    1490.0
F000'             1491.09
h,k,lmax          16,18,34                                16,18,34
Nref              21685                                    18970
Tmin,Tmax         0.923,0.935                             0.624,0.747
Tmin'             0.851

Correction method= # Reported T Limits: Tmin=0.624 Tmax=0.747
AbsCorr = MULTI SCAN

Data completeness= 0.875                                Theta(max)= 33.336

R(reflections)= 0.0572( 15394)                          wR2(reflections)=
                                                           0.1325( 18970)
S = 1.082                                           Npar= 947

```

---

The following ALERTS were generated. Each ALERT has the format

**test-name\_ALERT\_alert-type\_alert-level.**

Click on the hyperlinks for more details of the test.

---

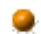

#### Alert level B

|                   |            |           |                                 |                         |       |       |
|-------------------|------------|-----------|---------------------------------|-------------------------|-------|-------|
| PLAT220_ALERT_2_B | NonSolvent | Resd 1    | C                               | Ueq(max)/Ueq(min) Range | 10.0  | Ratio |
| PLAT242_ALERT_2_B | Low        | 'MainMol' | Ueq as Compared to Neighbors of | 017                     | Check |       |

---

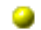

#### Alert level C

|                   |                                                  |                       |         |                           |        |        |
|-------------------|--------------------------------------------------|-----------------------|---------|---------------------------|--------|--------|
| PLAT213_ALERT_2_C | Atom C37                                         | has ADP max/min Ratio | .....   | 3.1                       | prolat |        |
| PLAT220_ALERT_2_C | NonSolvent                                       | Resd 1                | F       | Ueq(max)/Ueq(min) Range   | 3.4    | Ratio  |
| PLAT220_ALERT_2_C | NonSolvent                                       | Resd 1                | O       | Ueq(max)/Ueq(min) Range   | 4.1    | Ratio  |
| PLAT222_ALERT_3_C | NonSolvent                                       | Resd 1                | H       | Uiso(max)/Uiso(min) Range | 10.0   | Ratio  |
| PLAT234_ALERT_4_C | Large Hirshfeld Difference                       | O8A                   | --C20   | .                         | 0.16   | Ang.   |
| PLAT234_ALERT_4_C | Large Hirshfeld Difference                       | O16A                  | --C38   | .                         | 0.16   | Ang.   |
| PLAT309_ALERT_2_C | Single Bonded Oxygen (C-O > 1.3 Ang)             | .....                 |         |                           | 016A   | Check  |
| PLAT767_ALERT_4_C | INS Embedded LIST 6 Instruction Should be LIST 4 |                       |         |                           | Please | Check  |
| PLAT906_ALERT_3_C | Large K Value in the Analysis of Variance        | .....                 |         |                           | 3.196  | Check  |
| PLAT911_ALERT_3_C | Missing FCF Refl Between Thmin & STh/L=          | 0.600                 |         |                           | 78     | Report |
| PLAT934_ALERT_3_C | Number of (Iobs-Icalc)/Sigma(W) > 10 Outliers    | ..                    |         |                           | 1      | Check  |
| PLAT972_ALERT_2_C | Check Calcd Resid. Dens.                         | 1.92Ang               | From O5 |                           | -2.50  | eA-3   |
| PLAT977_ALERT_2_C | Check Negative Difference Density on             | H38A                  | .       |                           | -0.37  | eA-3   |
| PLAT977_ALERT_2_C | Check Negative Difference Density on             | H38B                  | .       |                           | -0.33  | eA-3   |
| PLAT977_ALERT_2_C | Check Negative Difference Density on             | H40A                  | .       |                           | -0.31  | eA-3   |
| PLAT977_ALERT_2_C | Check Negative Difference Density on             | H40C                  | .       |                           | -0.38  | eA-3   |

---

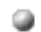

#### Alert level G

|                   |                                                  |                 |                                 |   |        |        |
|-------------------|--------------------------------------------------|-----------------|---------------------------------|---|--------|--------|
| PLAT002_ALERT_2_G | Number of Distance or Angle Restraints on AtSite |                 |                                 |   | 26     | Note   |
| PLAT003_ALERT_2_G | Number of Uiso or Uij Restrained non-H Atoms ... |                 |                                 |   | 13     | Report |
| PLAT083_ALERT_2_G | SHELXL Second Parameter in WGHT                  | Unusually Large |                                 |   | 8.46   | Why ?  |
| PLAT172_ALERT_4_G | The CIF-Embedded .res File Contains DFIX Records |                 |                                 |   | 2      | Report |
| PLAT173_ALERT_4_G | The CIF-Embedded .res File Contains DANG Records |                 |                                 |   | 1      | Report |
| PLAT176_ALERT_4_G | The CIF-Embedded .res File Contains SADI Records |                 |                                 |   | 3      | Report |
| PLAT177_ALERT_4_G | The CIF-Embedded .res File Contains DELU Records |                 |                                 |   | 3      | Report |
| PLAT186_ALERT_4_G | The CIF-Embedded .res File Contains ISOR Records |                 |                                 |   | 6      | Report |
| PLAT192_ALERT_3_G | A Non-default DELU Restraint Value for First Par |                 |                                 |   | 0.0010 | Report |
| PLAT192_ALERT_3_G | A Non-default DELU Restraint Value for SecondPar |                 |                                 |   | 0.0020 | Report |
| PLAT192_ALERT_3_G | A Non-default DELU Restraint Value for First Par |                 |                                 |   | 0.0050 | Report |
| PLAT192_ALERT_3_G | A Non-default DELU Restraint Value for First Par |                 |                                 |   | 0.0020 | Report |
| PLAT192_ALERT_3_G | A Non-default DELU Restraint Value for SecondPar |                 |                                 |   | 0.0040 | Report |
| PLAT242_ALERT_2_G | Low                                              | 'MainMol'       | Ueq as Compared to Neighbors of |   | C6     | Check  |
| PLAT242_ALERT_2_G | Low                                              | 'MainMol'       | Ueq as Compared to Neighbors of |   | C16    | Check  |
| PLAT242_ALERT_2_G | Low                                              | 'MainMol'       | Ueq as Compared to Neighbors of |   | C26    | Check  |
| PLAT301_ALERT_3_G | Main Residue Disorder .....                      | (Resd 1 )       |                                 |   | 17%    | Note   |
| PLAT311_ALERT_2_G | Isolated Disordered Oxygen Atom (No H's ?)       | .....           |                                 |   | 04A    | Check  |
| PLAT311_ALERT_2_G | Isolated Disordered Oxygen Atom (No H's ?)       | .....           |                                 |   | 08A    | Check  |
| PLAT311_ALERT_2_G | Isolated Disordered Oxygen Atom (No H's ?)       | .....           |                                 |   | 011A   | Check  |
| PLAT398_ALERT_2_G | Deviating C-O-C Angle From 120 for O16           | .               |                                 |   | 108.1  | Degree |
| PLAT432_ALERT_2_G | Short Inter X...Y Contact                        | F26             | ..C40                           | . | 2.51   | Ang.   |
|                   |                                                  |                 | x,1+y,z =                       |   | 1_565  | Check  |
| PLAT432_ALERT_2_G | Short Inter X...Y Contact                        | F27             | ..C40                           | . | 2.82   | Ang.   |
|                   |                                                  |                 | x,1+y,z =                       |   | 1_565  | Check  |

|                                                                    |               |   |             |
|--------------------------------------------------------------------|---------------|---|-------------|
| PLAT434_ALERT_2_G Short Inter HL..HL Contact F6                    | ..F6          | . | 2.62 Ang.   |
|                                                                    | -x,-y,-z =    |   | 2_555 Check |
| PLAT434_ALERT_2_G Short Inter HL..HL Contact F6                    | ..F18         | . | 2.76 Ang.   |
|                                                                    | -1+x,-1+y,z = |   | 1_445 Check |
| PLAT793_ALERT_4_G Model has Chirality at C7                        | (Centro SPGR) |   | S Verify    |
| PLAT793_ALERT_4_G Model has Chirality at C36                       | (Centro SPGR) |   | R Verify    |
| PLAT794_ALERT_5_G Tentative Bond Valency for Gd1                   | (III)         | . | 3.40 Info   |
| PLAT860_ALERT_3_G Number of Least-Squares Restraints .....         |               |   | 115 Note    |
| PLAT883_ALERT_1_G No Info/Value for _atom_sites_solution_primary   |               |   | Please Do ! |
| PLAT910_ALERT_3_G Missing # of FCF Reflection(s) Below Theta(Min). |               |   | 2 Note      |
| PLAT912_ALERT_4_G Missing # of FCF Reflections Above STh/L=        | 0.600         |   | 2635 Note   |
| PLAT933_ALERT_2_G Number of HKL-OMIT Records in Embedded .res File |               |   | 2 Note      |
| PLAT941_ALERT_3_G Average HKL Measurement Multiplicity .....       |               |   | 1.8 Low     |
| PLAT978_ALERT_2_G Number C-C Bonds with Positive Residual Density. |               |   | 1 Info      |

---

0 **ALERT level A** = Most likely a serious problem - resolve or explain  
 2 **ALERT level B** = A potentially serious problem, consider carefully  
 16 **ALERT level C** = Check. Ensure it is not caused by an omission or oversight  
 35 **ALERT level G** = General information/check it is not something unexpected

1 ALERT type 1 CIF construction/syntax error, inconsistent or missing data  
 27 ALERT type 2 Indicator that the structure model may be wrong or deficient  
 13 ALERT type 3 Indicator that the structure quality may be low  
 11 ALERT type 4 Improvement, methodology, query or suggestion  
 1 ALERT type 5 Informative message, check

---



---

It is advisable to attempt to resolve as many as possible of the alerts in all categories. Often the minor alerts point to easily fixed oversights, errors and omissions in your CIF or refinement strategy, so attention to these fine details can be worthwhile. In order to resolve some of the more serious problems it may be necessary to carry out additional measurements or structure refinements. However, the purpose of your study may justify the reported deviations and the more serious of these should normally be commented upon in the discussion or experimental section of a paper or in the "special\_details" fields of the CIF. checkCIF was carefully designed to identify outliers and unusual parameters, but every test has its limitations and alerts that are not important in a particular case may appear. Conversely, the absence of alerts does not guarantee there are no aspects of the results needing attention. It is up to the individual to critically assess their own results and, if necessary, seek expert advice.

### **Publication of your CIF in IUCr journals**

A basic structural check has been run on your CIF. These basic checks will be run on all CIFs submitted for publication in IUCr journals (*Acta Crystallographica*, *Journal of Applied Crystallography*, *Journal of Synchrotron Radiation*); however, if you intend to submit to *Acta Crystallographica Section C* or *E* or *IUCrData*, you should make sure that full publication checks are run on the final version of your CIF prior to submission.

### **Publication of your CIF in other journals**

Please refer to the *Notes for Authors* of the relevant journal for any special instructions relating to CIF submission.

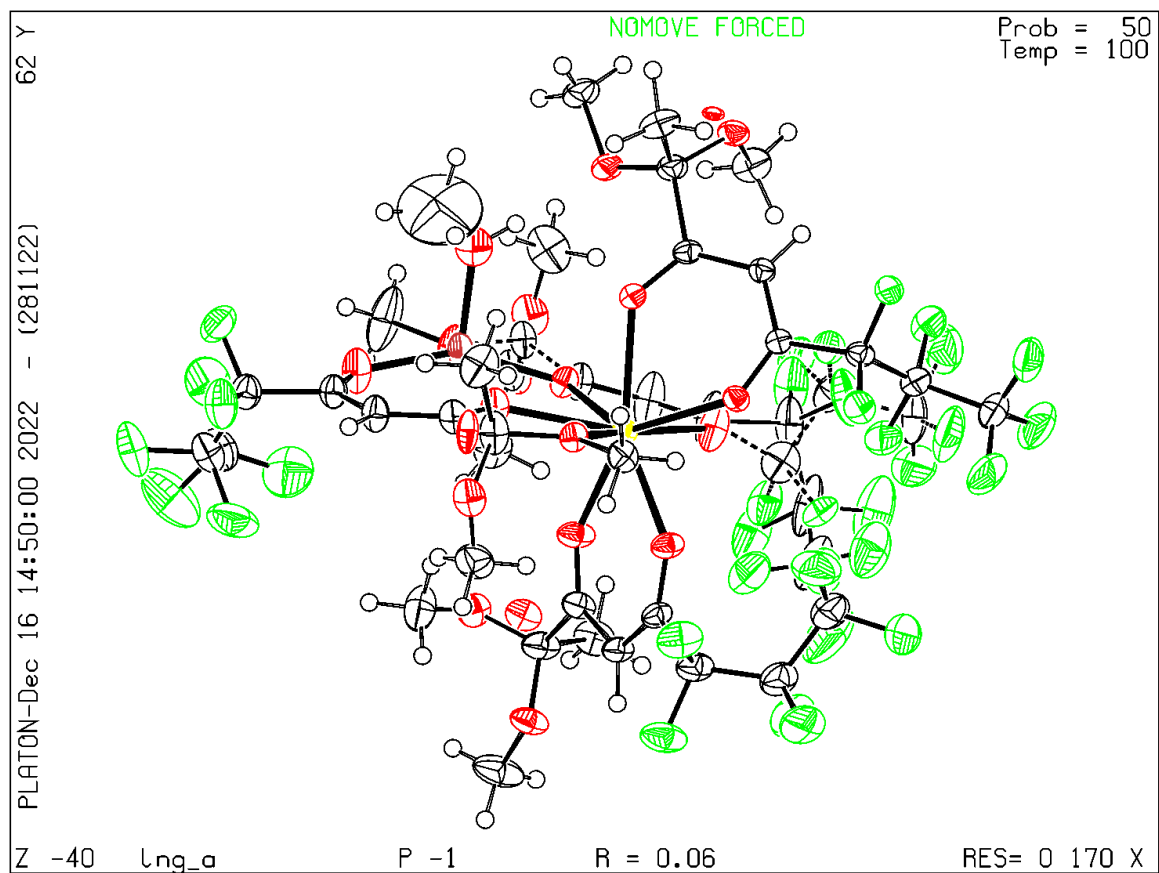

Supplement: s1 [file s1]
