# Supplementary material for: Perfluoroalkyl Chain Length Effect on Crystal Packing and [LnO8] Coordination Geometry in Lanthanide-Lithium β-Diketonates: Luminescence and Single-Ion Magnet Behavior
Source: MDPI journal article supplement (doi:10.3390/ijms24119778), 2023-06-05

## checkCIF/PLATON report

Structure factors have been supplied for datablock(s) 1\_a

THIS REPORT IS FOR GUIDANCE ONLY. IF USED AS PART OF A REVIEW PROCEDURE FOR PUBLICATION, IT SHOULD NOT REPLACE THE EXPERTISE OF AN EXPERIENCED CRYSTALLOGRAPHIC REFEREE.

No syntax errors found.      CIF dictionary      Interpreting this report

### Datablock: 1\_a

---

Bond precision:      C-C = 0.0127 Å      Wavelength=0.71073

Cell:                      a=11.1129(4)                      b=11.3025(5)                      c=23.0437(8)  
                              alpha=76.651(1)                      beta=77.617(1)                      gamma=71.897(1)  
Temperature:              250 K

|                        | Calculated                  | Reported                          |
|------------------------|-----------------------------|-----------------------------------|
| Volume                 | 2644.71(18)                 | 2644.71(18)                       |
| Space group            | P -1                        | P -1                              |
| Hall group             | -P 1                        | -P 1                              |
| Moiety formula         | C36 H40 Eu F20 Li O17, C H3 | C37 H43 Eu F20 Li O16.19, 0.81(O) |
| Sum formula            | C37 H43 Eu F20 Li O17       | C37 H43 Eu F20 Li O17             |
| Mr                     | 1298.63                     | 1298.61                           |
| Dx, g cm <sup>-3</sup> | 1.631                       | 1.631                             |
| Z                      | 2                           | 2                                 |
| Mu (mm <sup>-1</sup> ) | 1.319                       | 1.319                             |
| F000                   | 1294.0                      | 1294.0                            |
| F000'                  | 1294.83                     |                                   |
| h,k,lmax               | 17,17,35                    | 17,17,35                          |
| Nref                   | 20563                       | 18047                             |
| Tmin,Tmax              | 0.876,0.974                 | 0.592,0.747                       |
| Tmin'                  | 0.876                       |                                   |

Correction method= # Reported T Limits: Tmin=0.592 Tmax=0.747  
AbsCorr = MULTI SCAN

Data completeness= 0.878                      Theta(max)= 33.381

|                                |                                  |
|--------------------------------|----------------------------------|
| R(reflections)= 0.0744( 11945) | wR2(reflections)= 0.2389( 18047) |
| S = 1.030                      | Npar= 727                        |

---

The following ALERTS were generated. Each ALERT has the format

**test-name\_ALERT\_alert-type\_alert-level.**

Click on the hyperlinks for more details of the test.

---

### ● Alert level C

|                   |                                                  |              |
|-------------------|--------------------------------------------------|--------------|
| PLAT042_ALERT_1_C | Calc. and Reported MoietyFormula Strings Differ  | Please Check |
| PLAT094_ALERT_2_C | Ratio of Maximum / Minimum Residual Density .... | 2.09 Report  |
| PLAT230_ALERT_2_C | Hirshfeld Test Diff for F1 --C4 .                | 5.4 s.u.     |
| PLAT230_ALERT_2_C | Hirshfeld Test Diff for F3 --C5 .                | 6.4 s.u.     |
| PLAT230_ALERT_2_C | Hirshfeld Test Diff for F5 --C5 .                | 6.6 s.u.     |
| PLAT230_ALERT_2_C | Hirshfeld Test Diff for F9 --C14 .               | 6.4 s.u.     |
| PLAT230_ALERT_2_C | Hirshfeld Test Diff for F10 --C14 .              | 5.2 s.u.     |
| PLAT230_ALERT_2_C | Hirshfeld Test Diff for F16 --C31 .              | 6.4 s.u.     |
| PLAT230_ALERT_2_C | Hirshfeld Test Diff for F18 --C32 .              | 6.9 s.u.     |
| PLAT230_ALERT_2_C | Hirshfeld Test Diff for O17 --C37 .              | 5.1 s.u.     |
| PLAT230_ALERT_2_C | Hirshfeld Test Diff for C31 --C32 .              | 6.7 s.u.     |
| PLAT234_ALERT_4_C | Large Hirshfeld Difference F20 --C32 .           | 0.16 Ang.    |
| PLAT234_ALERT_4_C | Large Hirshfeld Difference O4 --C8 .             | 0.19 Ang.    |
| PLAT234_ALERT_4_C | Large Hirshfeld Difference O11 --C25 .           | 0.24 Ang.    |
| PLAT234_ALERT_4_C | Large Hirshfeld Difference O15A --C33 .          | 0.16 Ang.    |
| PLAT234_ALERT_4_C | Large Hirshfeld Difference C4 --C5 .             | 0.20 Ang.    |
| PLAT234_ALERT_4_C | Large Hirshfeld Difference C13 --C14 .           | 0.18 Ang.    |
| PLAT234_ALERT_4_C | Large Hirshfeld Difference C33 --C36 .           | 0.17 Ang.    |
| PLAT241_ALERT_2_C | High 'MainMol' Ueq as Compared to Neighbors of   | O14 Check    |
| PLAT241_ALERT_2_C | High 'MainMol' Ueq as Compared to Neighbors of   | C6 Check     |
| PLAT241_ALERT_2_C | High 'MainMol' Ueq as Compared to Neighbors of   | C20 Check    |
| PLAT242_ALERT_2_C | Low 'MainMol' Ueq as Compared to Neighbors of    | Eu1 Check    |
| PLAT242_ALERT_2_C | Low 'MainMol' Ueq as Compared to Neighbors of    | O12 Check    |
| PLAT242_ALERT_2_C | Low 'MainMol' Ueq as Compared to Neighbors of    | O16 Check    |
| PLAT242_ALERT_2_C | Low 'MainMol' Ueq as Compared to Neighbors of    | O17 Check    |
| PLAT242_ALERT_2_C | Low 'MainMol' Ueq as Compared to Neighbors of    | C4 Check     |
| PLAT242_ALERT_2_C | Low 'MainMol' Ueq as Compared to Neighbors of    | C13 Check    |
| PLAT242_ALERT_2_C | Low 'MainMol' Ueq as Compared to Neighbors of    | C22 Check    |
| PLAT242_ALERT_2_C | Low 'MainMol' Ueq as Compared to Neighbors of    | C31 Check    |
| PLAT260_ALERT_2_C | Large Average Ueq of Residue Including C9        | 0.103 Check  |
| PLAT342_ALERT_3_C | Low Bond Precision on C-C Bonds .....            | 0.01274 Ang. |
| PLAT360_ALERT_2_C | Short C(sp3)-C(sp3) Bond C13 - C14 .             | 1.43 Ang.    |
| PLAT360_ALERT_2_C | Short C(sp3)-C(sp3) Bond C31 - C32 .             | 1.38 Ang.    |
| PLAT361_ALERT_2_C | Long C(sp3)-C(sp3) Bond C33 - C36 .              | 1.67 Ang.    |
| PLAT767_ALERT_4_C | INS Embedded LIST 6 Instruction Should be LIST 4 | Please Check |
| PLAT906_ALERT_3_C | Large K Value in the Analysis of Variance .....  | 2.433 Check  |
| PLAT911_ALERT_3_C | Missing FCF Refl Between Thmin & STh/L= 0.600    | 67 Report    |
| PLAT971_ALERT_2_C | Check Calcd Resid. Dens. 1.45Ang From F19        | 2.30 eA-3    |
| PLAT971_ALERT_2_C | Check Calcd Resid. Dens. 1.18Ang From F10        | 1.73 eA-3    |
| PLAT971_ALERT_2_C | Check Calcd Resid. Dens. 0.78Ang From C24        | 1.68 eA-3    |
| PLAT971_ALERT_2_C | Check Calcd Resid. Dens. 1.54Ang From F4         | 1.59 eA-3    |

---

### ● Alert level G

|                   |                                                  |              |
|-------------------|--------------------------------------------------|--------------|
| PLAT002_ALERT_2_G | Number of Distance or Angle Restraints on AtSite | 4 Note       |
| PLAT003_ALERT_2_G | Number of Uiso or Uij Restrained non-H Atoms ... | 31 Report    |
| PLAT072_ALERT_2_G | SHELXL First Parameter in WGHT Unusually Large   | 0.14 Report  |
| PLAT154_ALERT_1_G | The s.u.'s on the Cell Angles are Equal ..(Note) | 0.001 Degree |
| PLAT172_ALERT_4_G | The CIF-Embedded .res File Contains DFIX Records | 2 Report     |
| PLAT177_ALERT_4_G | The CIF-Embedded .res File Contains DELU Records | 1 Report     |

|                   |                                                   |        |        |
|-------------------|---------------------------------------------------|--------|--------|
| PLAT186_ALERT_4_G | The CIF-Embedded .res File Contains ISOR Records  | 9      | Report |
| PLAT192_ALERT_3_G | A Non-default DELU Restraint Value for SecondPar  | 0.0200 | Report |
| PLAT230_ALERT_2_G | Hirshfeld Test Diff for O15 --C33 .               | 7.8    | s.u.   |
| PLAT230_ALERT_2_G | Hirshfeld Test Diff for O11A --C24 .              | 6.0    | s.u.   |
| PLAT230_ALERT_2_G | Hirshfeld Test Diff for O11A --C27 .              | 7.9    | s.u.   |
| PLAT242_ALERT_2_G | Low 'MainMol' Ueq as Compared to Neighbors of     | C5     | Check  |
| PLAT242_ALERT_2_G | Low 'MainMol' Ueq as Compared to Neighbors of     | C14    | Check  |
| PLAT242_ALERT_2_G | Low 'MainMol' Ueq as Compared to Neighbors of     | C23    | Check  |
| PLAT242_ALERT_2_G | Low 'MainMol' Ueq as Compared to Neighbors of     | C32    | Check  |
| PLAT301_ALERT_3_G | Main Residue Disorder .....(Resd 1 )              | 4%     | Note   |
| PLAT311_ALERT_2_G | Isolated Disordered Oxygen Atom (No H's ?) .....  | O4A    | Check  |
| PLAT311_ALERT_2_G | Isolated Disordered Oxygen Atom (No H's ?) .....  | O11A   | Check  |
| PLAT311_ALERT_2_G | Isolated Disordered Oxygen Atom (No H's ?) .....  | O15A   | Check  |
| PLAT343_ALERT_2_G | Unusual sp3 Angle Range in Main Residue for       | C32    | Check  |
| PLAT344_ALERT_2_G | Unusual sp? Angle Range in Solvent/Ion for        | C9     | Check  |
| PLAT398_ALERT_2_G | Deviating C-O-C Angle From 120 for O4 .           | 107.7  | Degree |
| PLAT398_ALERT_2_G | Deviating C-O-C Angle From 120 for O15 .          | 109.4  | Degree |
| PLAT432_ALERT_2_G | Short Inter X...Y Contact O3 ..C9 .               | 2.55   | Ang.   |
|                   | x,y,z =                                           | 1_555  | Check  |
| PLAT432_ALERT_2_G | Short Inter X...Y Contact C2 ..C9 .               | 3.18   | Ang.   |
|                   | x,y,z =                                           | 1_555  | Check  |
| PLAT432_ALERT_2_G | Short Inter X...Y Contact C3 ..C9 .               | 2.60   | Ang.   |
|                   | x,y,z =                                           | 1_555  | Check  |
| PLAT432_ALERT_2_G | Short Inter X...Y Contact C7 ..C9 .               | 3.10   | Ang.   |
|                   | x,y,z =                                           | 1_555  | Check  |
| PLAT773_ALERT_2_G | Check long C-C Bond in CIF: C6 --C9               | 1.77   | Ang.   |
| PLAT793_ALERT_4_G | Model has Chirality at C15 (Centro SPGR)          | R      | Verify |
| PLAT794_ALERT_5_G | Tentative Bond Valency for Eu1 (III) .            | 3.49   | Info   |
| PLAT860_ALERT_3_G | Number of Least-Squares Restraints .....          | 185    | Note   |
| PLAT883_ALERT_1_G | No Info/Value for _atom_sites_solution_primary .  | Please | Do !   |
| PLAT910_ALERT_3_G | Missing # of FCF Reflection(s) Below Theta(Min) . | 2      | Note   |
| PLAT912_ALERT_4_G | Missing # of FCF Reflections Above STh/L= 0.600   | 2446   | Note   |
| PLAT933_ALERT_2_G | Number of HKL-OMIT Records in Embedded .res File  | 1      | Note   |
| PLAT941_ALERT_3_G | Average HKL Measurement Multiplicity .....        | 1.8    | Low    |
| PLAT978_ALERT_2_G | Number C-C Bonds with Positive Residual Density.  | 0      | Info   |

---

0 **ALERT level A** = Most likely a serious problem - resolve or explain  
 0 **ALERT level B** = A potentially serious problem, consider carefully  
 41 **ALERT level C** = Check. Ensure it is not caused by an omission or oversight  
 37 **ALERT level G** = General information/check it is not something unexpected

3 ALERT type 1 CIF construction/syntax error, inconsistent or missing data  
 53 ALERT type 2 Indicator that the structure model may be wrong or deficient  
 8 ALERT type 3 Indicator that the structure quality may be low  
 13 ALERT type 4 Improvement, methodology, query or suggestion  
 1 ALERT type 5 Informative message, check

---

It is advisable to attempt to resolve as many as possible of the alerts in all categories. Often the minor alerts point to easily fixed oversights, errors and omissions in your CIF or refinement strategy, so attention to these fine details can be worthwhile. In order to resolve some of the more serious problems it may be necessary to carry out additional measurements or structure refinements. However, the purpose of your study may justify the reported deviations and the more serious of these should normally be commented upon in the discussion or experimental section of a paper or in the "special\_details" fields of the CIF. checkCIF was carefully designed to identify outliers and unusual parameters, but every test has its limitations and alerts that are not important in a particular case may appear. Conversely, the absence of alerts does not guarantee there are no aspects of the results needing attention. It is up to the individual to critically assess their own results and, if necessary, seek expert advice.

### **Publication of your CIF in IUCr journals**

A basic structural check has been run on your CIF. These basic checks will be run on all CIFs submitted for publication in IUCr journals (*Acta Crystallographica*, *Journal of Applied Crystallography*, *Journal of Synchrotron Radiation*); however, if you intend to submit to *Acta Crystallographica Section C* or *E* or *IUCrData*, you should make sure that full publication checks are run on the final version of your CIF prior to submission.

### **Publication of your CIF in other journals**

Please refer to the *Notes for Authors* of the relevant journal for any special instructions relating to CIF submission.

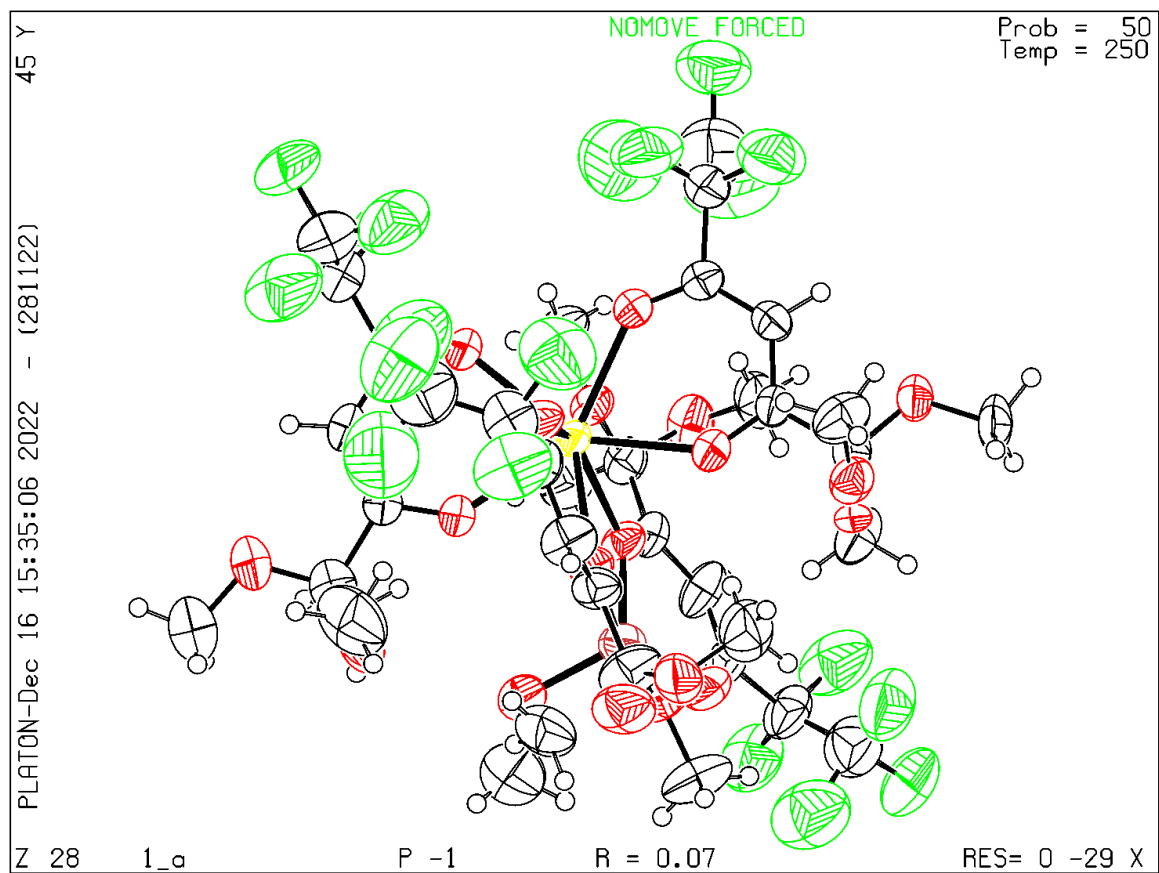

Supplement: s1 [file s1]
