# Supplementary material for: Perfluoroalkyl Chain Length Effect on Crystal Packing and [LnO8] Coordination Geometry in Lanthanide-Lithium β-Diketonates: Luminescence and Single-Ion Magnet Behavior
Source: MDPI journal article supplement (doi:10.3390/ijms24119778), 2023-06-05

## checkCIF/PLATON report

Structure factors have been supplied for datablock(s) 1\_a

THIS REPORT IS FOR GUIDANCE ONLY. IF USED AS PART OF A REVIEW PROCEDURE FOR PUBLICATION, IT SHOULD NOT REPLACE THE EXPERTISE OF AN EXPERIENCED CRYSTALLOGRAPHIC REFEREE.

No syntax errors found.      CIF dictionary      Interpreting this report

### Datablock: 1\_a

---

Bond precision:      C-C = 0.0133 Å      Wavelength=0.71073

Cell:                      a=11.1199 (7)                      b=11.3337 (7)                      c=23.0251 (13)  
                              alpha=76.524 (2)                      beta=77.560 (2)                      gamma=71.624 (2)  
Temperature:              250 K

|                        | Calculated            | Reported                             |
|------------------------|-----------------------|--------------------------------------|
| Volume                 | 2646.2 (3)            | 2646.2 (3)                           |
| Space group            | P -1                  | P -1                                 |
| Hall group             | -P 1                  | -P 1                                 |
| Moiety formula         | C37 H44 F20 Gd Li O17 | C37 H44 F20 Gd Li O16.44,<br>0.56(O) |
| Sum formula            | C37 H44 F20 Gd Li O17 | C37 H44 F20 Gd Li O17                |
| Mr                     | 1304.91               | 1304.91                              |
| Dx, g cm <sup>-3</sup> | 1.638                 | 1.638                                |
| Z                      | 2                     | 2                                    |
| Mu (mm <sup>-1</sup> ) | 1.386                 | 1.386                                |
| F000                   | 1298.0                | 1298.0                               |
| F000'                  | 1298.81               |                                      |
| h, k, lmax             | 15, 16, 32            | 15, 16, 32                           |
| Nref                   | 16142                 | 16007                                |
| Tmin, Tmax             | 0.745, 0.973          | 0.584, 0.747                         |
| Tmin'                  | 0.730                 |                                      |

Correction method= # Reported T Limits: Tmin=0.584 Tmax=0.747  
AbsCorr = MULTI SCAN

Data completeness= 0.992                      Theta(max)= 30.507

|                                 |                                      |
|---------------------------------|--------------------------------------|
| R(reflections)= 0.0759 ( 11609) | wR2(reflections)=<br>0.2349 ( 16007) |
| S = 1.034                       | Npar= 759                            |

---

The following ALERTS were generated. Each ALERT has the format

**test-name\_ALERT\_alert-type\_alert-level.**

Click on the hyperlinks for more details of the test.

---

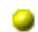

### Alert level C

|                   |                                                |                    |                                 |                   |       |         |        |
|-------------------|------------------------------------------------|--------------------|---------------------------------|-------------------|-------|---------|--------|
| PLAT220_ALERT_2_C | NonSolvent                                     | Resd 1             | C                               | Ueq(max)/Ueq(min) | Range | 3.3     | Ratio  |
| PLAT230_ALERT_2_C | Hirshfeld Test Diff for                        | F22A               | --C22                           | .                 |       | 5.8     | s.u.   |
| PLAT230_ALERT_2_C | Hirshfeld Test Diff for                        | F23A               | --C23                           | .                 |       | 6.3     | s.u.   |
| PLAT230_ALERT_2_C | Hirshfeld Test Diff for                        | F23C               | --C23                           | .                 |       | 5.6     | s.u.   |
| PLAT230_ALERT_2_C | Hirshfeld Test Diff for                        | C15                | --C18                           | .                 |       | 5.1     | s.u.   |
| PLAT230_ALERT_2_C | Hirshfeld Test Diff for                        | C24                | --C27                           | .                 |       | 5.6     | s.u.   |
| PLAT234_ALERT_4_C | Large Hirshfeld Difference                     | F14A               | --C14                           | .                 |       | 0.18    | Ang.   |
| PLAT234_ALERT_4_C | Large Hirshfeld Difference                     | F14C               | --C14                           | .                 |       | 0.24    | Ang.   |
| PLAT234_ALERT_4_C | Large Hirshfeld Difference                     | F22B               | --C22                           | .                 |       | 0.16    | Ang.   |
| PLAT234_ALERT_4_C | Large Hirshfeld Difference                     | F23B               | --C23                           | .                 |       | 0.16    | Ang.   |
| PLAT234_ALERT_4_C | Large Hirshfeld Difference                     | F32A               | --C32                           | .                 |       | 0.18    | Ang.   |
| PLAT234_ALERT_4_C | Large Hirshfeld Difference                     | F32B               | --C32                           | .                 |       | 0.18    | Ang.   |
| PLAT234_ALERT_4_C | Large Hirshfeld Difference                     | O4                 | --C8                            | .                 |       | 0.17    | Ang.   |
| PLAT234_ALERT_4_C | Large Hirshfeld Difference                     | O8                 | --C15                           | .                 |       | 0.18    | Ang.   |
| PLAT234_ALERT_4_C | Large Hirshfeld Difference                     | O8                 | --C17                           | .                 |       | 0.19    | Ang.   |
| PLAT234_ALERT_4_C | Large Hirshfeld Difference                     | O12                | --C24                           | .                 |       | 0.19    | Ang.   |
| PLAT234_ALERT_4_C | Large Hirshfeld Difference                     | C13                | --C14                           | .                 |       | 0.19    | Ang.   |
| PLAT234_ALERT_4_C | Large Hirshfeld Difference                     | C22                | --C23                           | .                 |       | 0.17    | Ang.   |
| PLAT234_ALERT_4_C | Large Hirshfeld Difference                     | C31                | --C32                           | .                 |       | 0.20    | Ang.   |
| PLAT241_ALERT_2_C | High                                           | 'MainMol'          | Ueq as Compared to Neighbors of |                   |       | C2      | Check  |
| PLAT242_ALERT_2_C | Low                                            | 'MainMol'          | Ueq as Compared to Neighbors of |                   |       | Gd1     | Check  |
| PLAT242_ALERT_2_C | Low                                            | 'MainMol'          | Ueq as Compared to Neighbors of |                   |       | C4      | Check  |
| PLAT242_ALERT_2_C | Low                                            | 'MainMol'          | Ueq as Compared to Neighbors of |                   |       | C13     | Check  |
| PLAT242_ALERT_2_C | Low                                            | 'MainMol'          | Ueq as Compared to Neighbors of |                   |       | C22     | Check  |
| PLAT242_ALERT_2_C | Low                                            | 'MainMol'          | Ueq as Compared to Neighbors of |                   |       | C31     | Check  |
| PLAT309_ALERT_2_C | Single Bonded Oxygen (C-O > 1.3 Ang)           | .....              |                                 |                   |       | O4A     | Check  |
| PLAT342_ALERT_3_C | Low Bond Precision on                          | C-C Bonds          | .....                           |                   |       | 0.01332 | Ang.   |
| PLAT361_ALERT_2_C | Long                                           | C(sp3)-C(sp3) Bond | C15                             | - C18             | .     | 1.74    | Ang.   |
| PLAT767_ALERT_4_C | INS Embedded LIST 6 Instruction Should be      | LIST 4             |                                 |                   |       | Please  | Check  |
| PLAT911_ALERT_3_C | Missing FCF Refl Between Thmin & STh/L=        | 0.600              |                                 |                   |       | 64      | Report |
| PLAT918_ALERT_3_C | Reflection(s) with I(obs) much Smaller I(calc) | .                  |                                 |                   |       | 1       | Check  |
| PLAT971_ALERT_2_C | Check Calcd Resid. Dens.                       | 0.95Ang            | From F23B                       |                   |       | 2.31    | eA-3   |
| PLAT971_ALERT_2_C | Check Calcd Resid. Dens.                       | 1.26Ang            | From F23B                       |                   |       | 2.05    | eA-3   |
| PLAT971_ALERT_2_C | Check Calcd Resid. Dens.                       | 0.87Ang            | From F14A                       |                   |       | 1.58    | eA-3   |
| PLAT971_ALERT_2_C | Check Calcd Resid. Dens.                       | 1.22Ang            | From F32C                       |                   |       | 1.52    | eA-3   |
| PLAT972_ALERT_2_C | Check Calcd Resid. Dens.                       | 0.58Ang            | From F23A                       |                   |       | -1.61   | eA-3   |
| PLAT973_ALERT_2_C | Check Calcd Positive Resid. Density on         |                    | Gd1                             |                   |       | 1.26    | eA-3   |
| PLAT977_ALERT_2_C | Check Negative Difference Density on           | H17B               | .                               |                   |       | -0.32   | eA-3   |

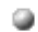

### Alert level G

|                   |                                                  |       |        |
|-------------------|--------------------------------------------------|-------|--------|
| PLAT002_ALERT_2_G | Number of Distance or Angle Restraints on AtSite | 28    | Note   |
| PLAT003_ALERT_2_G | Number of Uiso or Uij Restrained non-H Atoms ... | 23    | Report |
| PLAT072_ALERT_2_G | SHELXL First Parameter in WGHT Unusually Large   | 0.13  | Report |
| PLAT154_ALERT_1_G | The s.u.'s on the Cell Angles are Equal ..(Note) | 0.002 | Degree |
| PLAT172_ALERT_4_G | The CIF-Embedded .res File Contains DFIX Records | 4     | Report |
| PLAT173_ALERT_4_G | The CIF-Embedded .res File Contains DANG Records | 2     | Report |
| PLAT176_ALERT_4_G | The CIF-Embedded .res File Contains SADI Records | 6     | Report |
| PLAT177_ALERT_4_G | The CIF-Embedded .res File Contains DELU Records | 1     | Report |
| PLAT186_ALERT_4_G | The CIF-Embedded .res File Contains ISOR Records | 7     | Report |

|                   |                                                   |        |             |
|-------------------|---------------------------------------------------|--------|-------------|
| PLAT192_ALERT_3_G | A Non-default DELU Restraint Value for SecondPar  | 0.0200 | Report      |
| PLAT230_ALERT_2_G | Hirshfeld Test Diff for C6 --C9 .                 | 5.2    | s.u.        |
| PLAT230_ALERT_2_G | Hirshfeld Test Diff for C8 --C6A .                | 6.6    | s.u.        |
| PLAT242_ALERT_2_G | Low 'MainMol' Ueq as Compared to Neighbors of C5  |        | Check       |
| PLAT242_ALERT_2_G | Low 'MainMol' Ueq as Compared to Neighbors of C14 |        | Check       |
| PLAT301_ALERT_3_G | Main Residue Disorder .....(Resd 1 )              | 8%     | Note        |
| PLAT311_ALERT_2_G | Isolated Disordered Oxygen Atom (No H's ?) .....  | 08A    | Check       |
| PLAT311_ALERT_2_G | Isolated Disordered Oxygen Atom (No H's ?) .....  | 012A   | Check       |
| PLAT367_ALERT_2_G | Long? C(sp?)-C(sp?) Bond C21 - C24 .              | 1.55   | Ang.        |
| PLAT367_ALERT_2_G | Long? C(sp?)-C(sp?) Bond C24 - C27 .              | 1.69   | Ang.        |
| PLAT398_ALERT_2_G | Deviating C-O-C Angle From 120 for O4 .           | 108.7  | Degree      |
| PLAT398_ALERT_2_G | Deviating C-O-C Angle From 120 for O8 .           | 108.5  | Degree      |
| PLAT412_ALERT_2_G | Short Intra XH3 .. XHn H7A ..H9C .                | 2.04   | Ang.        |
|                   | x,y,z =                                           | 1_555  | Check       |
| PLAT412_ALERT_2_G | Short Intra XH3 .. XHn H8C ..H7AC .               | 1.92   | Ang.        |
|                   | x,y,z =                                           | 1_555  | Check       |
| PLAT413_ALERT_2_G | Short Inter XH3 .. XHn H2 ..H7AB .                | 2.09   | Ang.        |
|                   | -x,-y,1-z =                                       | 2_556  | Check       |
| PLAT720_ALERT_4_G | Number of Unusual/Non-Standard Labels .....       | 3      | Note        |
| PLAT773_ALERT_2_G | Check long C-C Bond in CIF: C15 --C18             | 1.74   | Ang.        |
| PLAT793_ALERT_4_G | Model has Chirality at C15 (Centro SPGR)          |        | R Verify    |
| PLAT793_ALERT_4_G | Model has Chirality at C33 (Centro SPGR)          |        | R Verify    |
| PLAT794_ALERT_5_G | Tentative Bond Valency for Gd1 (III) .            | 3.50   | Info        |
| PLAT860_ALERT_3_G | Number of Least-Squares Restraints .....          | 201    | Note        |
| PLAT883_ALERT_1_G | No Info/Value for _atom_sites_solution_primary .  |        | Please Do ! |
| PLAT910_ALERT_3_G | Missing # of FCF Reflection(s) Below Theta(Min).  | 2      | Note        |
| PLAT912_ALERT_4_G | Missing # of FCF Reflections Above STh/L= 0.600   | 70     | Note        |
| PLAT913_ALERT_3_G | Missing # of Very Strong Reflections in FCF ....  | 3      | Note        |
| PLAT933_ALERT_2_G | Number of HKL-OMIT Records in Embedded .res File  | 1      | Note        |
| PLAT941_ALERT_3_G | Average HKL Measurement Multiplicity .....        | 2.1    | Low         |
| PLAT978_ALERT_2_G | Number C-C Bonds with Positive Residual Density.  | 0      | Info        |

---

0 **ALERT level A** = Most likely a serious problem - resolve or explain  
 0 **ALERT level B** = A potentially serious problem, consider carefully  
 38 **ALERT level C** = Check. Ensure it is not caused by an omission or oversight  
 37 **ALERT level G** = General information/check it is not something unexpected

2 ALERT type 1 CIF construction/syntax error, inconsistent or missing data  
 40 ALERT type 2 Indicator that the structure model may be wrong or deficient  
 9 ALERT type 3 Indicator that the structure quality may be low  
 23 ALERT type 4 Improvement, methodology, query or suggestion  
 1 ALERT type 5 Informative message, check

---



---

It is advisable to attempt to resolve as many as possible of the alerts in all categories. Often the minor alerts point to easily fixed oversights, errors and omissions in your CIF or refinement strategy, so attention to these fine details can be worthwhile. In order to resolve some of the more serious problems it may be necessary to carry out additional measurements or structure refinements. However, the purpose of your study may justify the reported deviations and the more serious of these should normally be commented upon in the discussion or experimental section of a paper or in the "special\_details" fields of the CIF. checkCIF was carefully designed to identify outliers and unusual parameters, but every test has its limitations and alerts that are not important in a particular case may appear. Conversely, the absence of alerts does not guarantee there are no aspects of the results needing attention. It is up to the individual to critically assess their own results and, if necessary, seek expert advice.

### **Publication of your CIF in IUCr journals**

A basic structural check has been run on your CIF. These basic checks will be run on all CIFs submitted for publication in IUCr journals (*Acta Crystallographica*, *Journal of Applied Crystallography*, *Journal of Synchrotron Radiation*); however, if you intend to submit to *Acta Crystallographica Section C* or *E* or *IUCrData*, you should make sure that full publication checks are run on the final version of your CIF prior to submission.

### **Publication of your CIF in other journals**

Please refer to the *Notes for Authors* of the relevant journal for any special instructions relating to CIF submission.

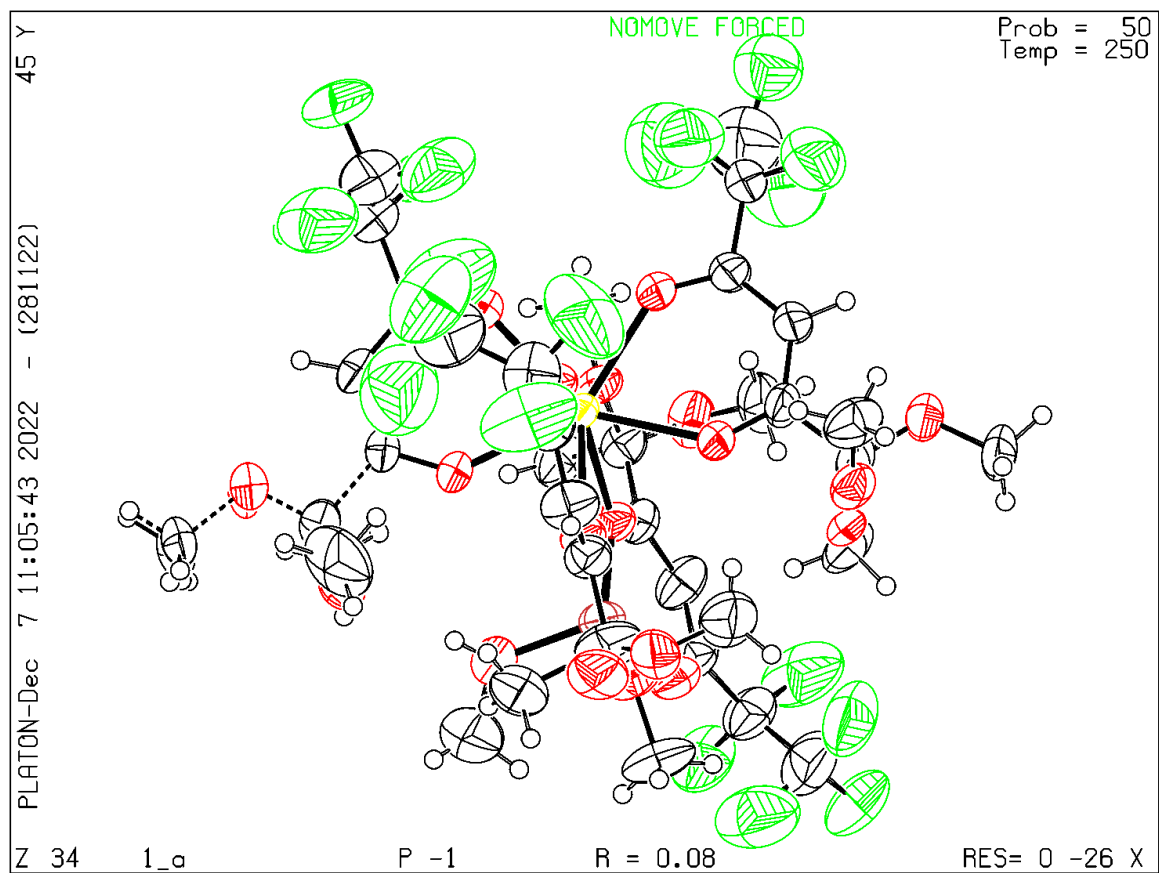

Supplement: s1 [file s1]
