# Supplementary material for: Perfluoroalkyl Chain Length Effect on Crystal Packing and [LnO8] Coordination Geometry in Lanthanide-Lithium β-Diketonates: Luminescence and Single-Ion Magnet Behavior
Source: MDPI journal article supplement (doi:10.3390/ijms24119778), 2023-06-05

# checkCIF/PLATON report

Structure factors have been supplied for datablock(s) z11

THIS REPORT IS FOR GUIDANCE ONLY. IF USED AS PART OF A REVIEW PROCEDURE FOR PUBLICATION, IT SHOULD NOT REPLACE THE EXPERTISE OF AN EXPERIENCED CRYSTALLOGRAPHIC REFEREE.

No syntax errors found.      CIF dictionary      Interpreting this report

## Datablock: z11

---

Bond precision:    C-C = 0.0137 Å

Wavelength=1.54178

Cell:            a=11.0001(4)            b=14.8467(5)            c=22.0163(7)  
                  alpha=102.4725(16) beta=98.0625(16) gamma=106.5187(17)  
Temperature: 240 K

|                | Calculated            | Reported              |
|----------------|-----------------------|-----------------------|
| Volume         | 3286.8(2)             | 3286.8(2)             |
| Space group    | P -1                  | P -1                  |
| Hall group     | -P 1                  | -P 1                  |
| Moiety formula | C45 H44 Dy F36 Li O17 | ?                     |
| Sum formula    | C45 H44 Dy F36 Li O17 | C45 H44 Dy F36 Li O17 |
| Mr             | 1710.24               | 1710.24               |
| Dx,g cm-3      | 1.728                 | 1.728                 |
| Z              | 2                     | 2                     |
| Mu (mm-1)      | 7.599                 | 7.599                 |
| F000           | 1686.0                | 1686.0                |
| F000'          | 1674.91               |                       |
| h,k,lmax       | 13,17,26              | 13,17,26              |
| Nref           | 11941                 | 11760                 |
| Tmin,Tmax      | 0.271,0.320           |                       |
| Tmin'          | 0.205                 |                       |

Correction method= Not given

Data completeness= 0.985

Theta(max)= 67.873

R(reflections)= 0.0821( 10270)

wR2(reflections)= 0.2144( 11760)

S = 1.055

Npar= 901

---

The following ALERTS were generated. Each ALERT has the format  
**test-name\_ALERT\_alert-type\_alert-level.**  
Click on the hyperlinks for more details of the test.

---

## 🟡 Alert level B

|                   |     |           |                                 |      |       |
|-------------------|-----|-----------|---------------------------------|------|-------|
| PLAT242_ALERT_2_B | Low | 'MainMol' | Ueq as Compared to Neighbors of | C12D | Check |
| PLAT242_ALERT_2_B | Low | 'MainMol' | Ueq as Compared to Neighbors of | C15B | Check |
| PLAT242_ALERT_2_B | Low | 'MainMol' | Ueq as Compared to Neighbors of | C18C | Check |
| PLAT242_ALERT_2_B | Low | 'MainMol' | Ueq as Compared to Neighbors of | C18D | Check |

## 🟢 Alert level C

RINTA01\_ALERT\_3\_C The value of Rint is greater than 0.12  
Rint given 0.138

|                   |                                                  |         |        |
|-------------------|--------------------------------------------------|---------|--------|
| PLAT020_ALERT_3_C | The Value of Rint is Greater Than 0.12           | 0.138   | Report |
| PLAT057_ALERT_3_C | Correction for Absorption Required RT(exp) ...   | 1.18    | Do !   |
| PLAT213_ALERT_2_C | Atom F14D has ADP max/min Ratio                  | 3.7     | prolat |
| PLAT213_ALERT_2_C | Atom F19D has ADP max/min Ratio                  | 4.0     | prolat |
| PLAT213_ALERT_2_C | Atom F20D has ADP max/min Ratio                  | 3.9     | prolat |
| PLAT220_ALERT_2_C | Non-Solvent Resd 1 C Ueq(max)/Ueq(min) Range     | 4.0     | Ratio  |
| PLAT220_ALERT_2_C | Non-Solvent Resd 1 F Ueq(max)/Ueq(min) Range     | 4.8     | Ratio  |
| PLAT230_ALERT_2_C | Hirshfeld Test Diff for 07A --C8A                | 6.3     | s.u.   |
| PLAT234_ALERT_4_C | Large Hirshfeld Difference F17D --C15D           | 0.18    | Ang.   |
| PLAT234_ALERT_4_C | Large Hirshfeld Difference F20B --C18B           | 0.19    | Ang.   |
| PLAT234_ALERT_4_C | Large Hirshfeld Difference 07C --C8C             | 0.17    | Ang.   |
| PLAT234_ALERT_4_C | Large Hirshfeld Difference C3A --C4A             | 0.16    | Ang.   |
| PLAT241_ALERT_2_C | High 'MainMol' Ueq as Compared to Neighbors of   | 07A     | Check  |
| PLAT242_ALERT_2_C | Low 'MainMol' Ueq as Compared to Neighbors of    | 01S     | Check  |
| PLAT242_ALERT_2_C | Low 'MainMol' Ueq as Compared to Neighbors of    | 05A     | Check  |
| PLAT242_ALERT_2_C | Low 'MainMol' Ueq as Compared to Neighbors of    | 07B     | Check  |
| PLAT242_ALERT_2_C | Low 'MainMol' Ueq as Compared to Neighbors of    | C12A    | Check  |
| PLAT242_ALERT_2_C | Low 'MainMol' Ueq as Compared to Neighbors of    | C12B    | Check  |
| PLAT242_ALERT_2_C | Low 'MainMol' Ueq as Compared to Neighbors of    | C12C    | Check  |
| PLAT242_ALERT_2_C | Low 'MainMol' Ueq as Compared to Neighbors of    | C15A    | Check  |
| PLAT242_ALERT_2_C | Low 'MainMol' Ueq as Compared to Neighbors of    | C15C    | Check  |
| PLAT242_ALERT_2_C | Low 'MainMol' Ueq as Compared to Neighbors of    | C15D    | Check  |
| PLAT242_ALERT_2_C | Low 'MainMol' Ueq as Compared to Neighbors of    | C18A    | Check  |
| PLAT242_ALERT_2_C | Low 'MainMol' Ueq as Compared to Neighbors of    | C18B    | Check  |
| PLAT260_ALERT_2_C | Large Average Ueq of Residue Including Dy        | 0.139   | Check  |
| PLAT342_ALERT_3_C | Low Bond Precision on C-C Bonds                  | 0.01366 | Ang.   |
| PLAT601_ALERT_2_C | Structure Contains Solvent Accessible VOIDS of   | 47      | Ang**3 |
| PLAT911_ALERT_3_C | Missing FCF Refl Between Thmin & STh/L= 0.600    | 140     | Report |
| PLAT971_ALERT_2_C | Check Calcd Resid. Dens. 1.00A From Dy           | 1.72    | eA-3   |
| PLAT971_ALERT_2_C | Check Calcd Resid. Dens. 1.58A From F24B         | 1.70    | eA-3   |
| PLAT971_ALERT_2_C | Check Calcd Resid. Dens. 1.11A From Dy           | 1.55    | eA-3   |
| PLAT971_ALERT_2_C | Check Calcd Resid. Dens. 1.01A From Dy           | 1.54    | eA-3   |
| PLAT975_ALERT_2_C | Check Calcd Resid. Dens. 0.99A From O5D          | 0.71    | eA-3   |
| PLAT977_ALERT_2_C | Check Negative Difference Density on H1SC        | -0.43   | eA-3   |
| PLAT978_ALERT_2_C | Number C-C Bonds with Positive Residual Density. | 0       | Info   |

## 🟢 Alert level G

|                   |                                                  |       |        |
|-------------------|--------------------------------------------------|-------|--------|
| PLAT002_ALERT_2_G | Number of Distance or Angle Restraints on AtSite | 20    | Note   |
| PLAT003_ALERT_2_G | Number of Uiso or Uij Restrained non-H Atoms ... | 100   | Report |
| PLAT007_ALERT_5_G | Number of Unrefined Donor-H Atoms                | 1     | Report |
| PLAT072_ALERT_2_G | SHELXL First Parameter in WGHT Unusually Large   | 0.17  | Report |
| PLAT172_ALERT_4_G | The CIF-Embedded .res File Contains DFIX Records | 9     | Report |
| PLAT177_ALERT_4_G | The CIF-Embedded .res File Contains DELU Records | 1     | Report |
| PLAT242_ALERT_2_G | Low 'MainMol' Ueq as Compared to Neighbors of    | C21A  | Check  |
| PLAT242_ALERT_2_G | Low 'MainMol' Ueq as Compared to Neighbors of    | C21B  | Check  |
| PLAT242_ALERT_2_G | Low 'MainMol' Ueq as Compared to Neighbors of    | C21C  | Check  |
| PLAT242_ALERT_2_G | Low 'MainMol' Ueq as Compared to Neighbors of    | C21D  | Check  |
| PLAT343_ALERT_2_G | Unusual sp3 Angle Range in Main Residue for      | C18B  | Check  |
| PLAT398_ALERT_2_G | Deviating C-O-C Angle From 120 for 07A           | 102.4 | Degree |
| PLAT434_ALERT_2_G | Short Inter HL..HL Contact F20D ..F24B           | 2.75  | Ang.   |

|                   | x,-1+y,z =                                       | 1_545 | Check       |
|-------------------|--------------------------------------------------|-------|-------------|
| PLAT720_ALERT_4_G | Number of Unusual/Non-Standard Labels .....      | 43    | Note        |
| PLAT793_ALERT_4_G | Model has Chirality at C3A (Centro SPGR)         | S     | Verify      |
| PLAT793_ALERT_4_G | Model has Chirality at C3D (Centro SPGR)         | S     | Verify      |
| PLAT794_ALERT_5_G | Tentative Bond Valency for Dy (III) .            | 3.17  | Info        |
| PLAT860_ALERT_3_G | Number of Least-Squares Restraints .....         | 355   | Note        |
| PLAT883_ALERT_1_G | No Info/Value for _atom_sites_solution_primary . |       | Please Do ! |
| PLAT909_ALERT_3_G | Percentage of I>2sig(I) Data at Theta(Max) Still | 74%   | Note        |
| PLAT912_ALERT_4_G | Missing # of FCF Reflections Above STh/L= 0.600  | 40    | Note        |
| PLAT933_ALERT_2_G | Number of OMIT Records in Embedded .res File ... | 2     | Note        |

---

0 **ALERT level A** = Most likely a serious problem - resolve or explain  
 4 **ALERT level B** = A potentially serious problem, consider carefully  
 36 **ALERT level C** = Check. Ensure it is not caused by an omission or oversight  
 22 **ALERT level G** = General information/check it is not something unexpected

1 ALERT type 1 CIF construction/syntax error, inconsistent or missing data  
 42 ALERT type 2 Indicator that the structure model may be wrong or deficient  
 7 ALERT type 3 Indicator that the structure quality may be low  
 10 ALERT type 4 Improvement, methodology, query or suggestion  
 2 ALERT type 5 Informative message, check

---

It is advisable to attempt to resolve as many as possible of the alerts in all categories. Often the minor alerts point to easily fixed oversights, errors and omissions in your CIF or refinement strategy, so attention to these fine details can be worthwhile. In order to resolve some of the more serious problems it may be necessary to carry out additional measurements or structure refinements. However, the purpose of your study may justify the reported deviations and the more serious of these should normally be commented upon in the discussion or experimental section of a paper or in the "special\_details" fields of the CIF. checkCIF was carefully designed to identify outliers and unusual parameters, but every test has its limitations and alerts that are not important in a particular case may appear. Conversely, the absence of alerts does not guarantee there are no aspects of the results needing attention. It is up to the individual to critically assess their own results and, if necessary, seek expert advice.

### Publication of your CIF in IUCr journals

A basic structural check has been run on your CIF. These basic checks will be run on all CIFs submitted for publication in IUCr journals (*Acta Crystallographica*, *Journal of Applied Crystallography*, *Journal of Synchrotron Radiation*); however, if you intend to submit to *Acta Crystallographica Section C* or *E* or *IUCrData*, you should make sure that full publication checks are run on the final version of your CIF prior to submission.

### Publication of your CIF in other journals

Please refer to the *Notes for Authors* of the relevant journal for any special instructions relating to CIF submission.

---

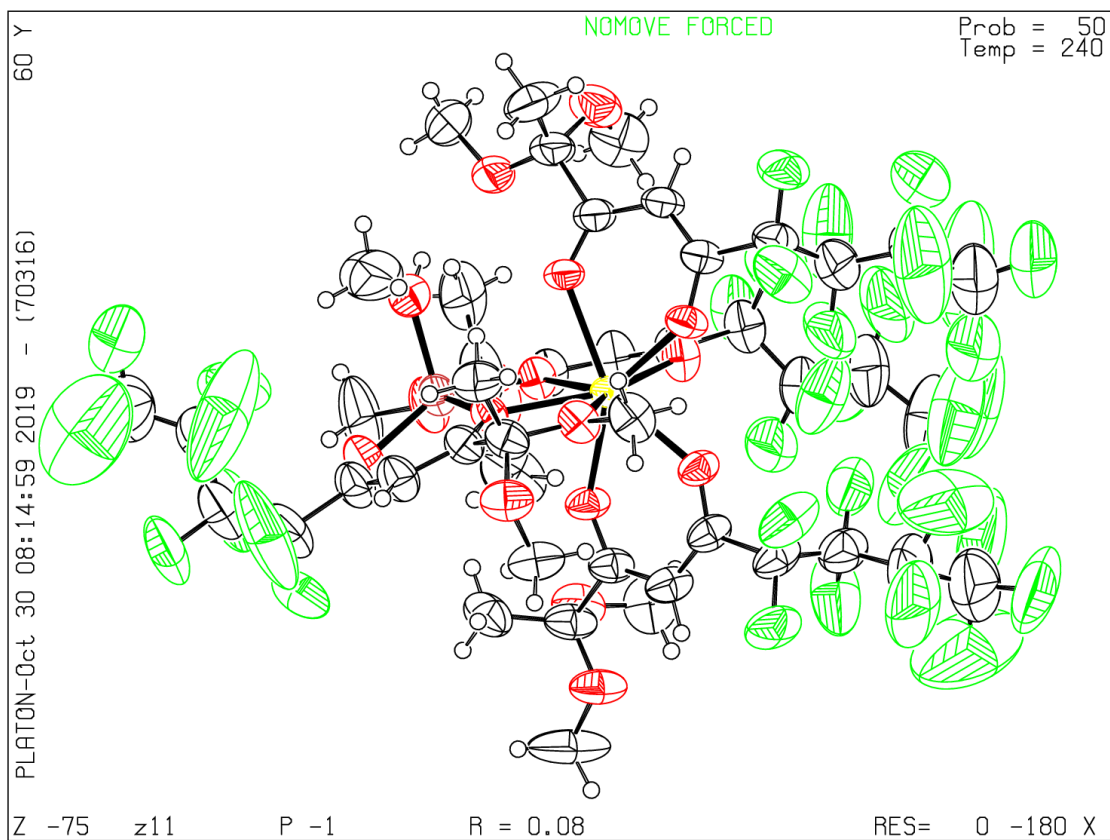

Supplement: s1 [file s1]
