# Supplementary material for: Perfluoroalkyl Chain Length Effect on Crystal Packing and [LnO8] Coordination Geometry in Lanthanide-Lithium β-Diketonates: Luminescence and Single-Ion Magnet Behavior
Source: MDPI journal article supplement (doi:10.3390/ijms24119778), 2023-06-05

# checkCIF/PLATON report

Structure factors have been supplied for datablock(s) 252

THIS REPORT IS FOR GUIDANCE ONLY. IF USED AS PART OF A REVIEW PROCEDURE FOR PUBLICATION, IT SHOULD NOT REPLACE THE EXPERTISE OF AN EXPERIENCED CRYSTALLOGRAPHIC REFEREE.

No syntax errors found.      CIF dictionary      Interpreting this report

## Datablock: 252

---

|                 |                                           |                                     |
|-----------------|-------------------------------------------|-------------------------------------|
| Bond precision: | C-C = 0.0087 A                            | Wavelength=1.54178                  |
| Cell:           | a=11.1190(3)                              | b=11.3357(3)      c=22.9094(6)      |
|                 | alpha=76.297(1)                           | beta=77.360(1)      gamma=71.388(1) |
| Temperature:    | 296 K                                     |                                     |
|                 | Calculated                                | Reported                            |
| Volume          | 2626.27(12)                               | 2626.27(12)                         |
| Space group     | P -1                                      | P -1                                |
| Hall group      | -P 1                                      | -P 1                                |
| Moiety formula  | C36 H41 Dy F19.50 Li O17,<br>0.5(F), C H3 | ?                                   |
| Sum formula     | C37 H44 Dy F20 Li O17                     | C37 H44 Dy F20 Li O17               |
| Mr              | 1310.16                                   | 1310.16                             |
| Dx,g cm-3       | 1.657                                     | 1.657                               |
| Z               | 2                                         | 2                                   |
| Mu (mm-1)       | 8.848                                     | 8.848                               |
| F000            | 1302.0                                    | 1302.0                              |
| F000'           | 1288.35                                   |                                     |
| h,k,lmax        | 13,13,27                                  | 13,13,27                            |
| Nref            | 9540                                      | 9407                                |
| Tmin,Tmax       | 0.687,0.767                               |                                     |
| Tmin'           | 0.253                                     |                                     |

Correction method= Not given

Data completeness= 0.986      Theta(max)= 67.761

R(reflections)= 0.0402( 8914)      wR2(reflections)= 0.1103( 9407)

S = 1.037      Npar= 805

---

The following ALERTS were generated. Each ALERT has the format

**test-name\_ALERT\_alert-type\_alert-level.**

Click on the hyperlinks for more details of the test.

---

### 🔴 Alert level B

|                   |                                                |                       |        |     |             |
|-------------------|------------------------------------------------|-----------------------|--------|-----|-------------|
| PLAT215_ALERT_3_B | Disordered F9A                                 | has ADP max/min Ratio | .....  | 4.2 | Note        |
| PLAT215_ALERT_3_B | Disordered F9C                                 | has ADP max/min Ratio | .....  | 4.3 | Note        |
| PLAT230_ALERT_2_B | Hirshfeld Test Diff for                        | O14D                  | --C15D | .   | 30.9 s.u.   |
| PLAT230_ALERT_2_B | Hirshfeld Test Diff for                        | O16C                  | --C17C | .   | 20.0 s.u.   |
| PLAT230_ALERT_2_B | Hirshfeld Test Diff for                        | C13B                  | --C18B | .   | 13.6 s.u.   |
| PLAT230_ALERT_2_B | Hirshfeld Test Diff for                        | C13C                  | --C18C | .   | 8.0 s.u.    |
| PLAT234_ALERT_4_B | Large Hirshfeld Difference                     | F7D                   | --C6D  | .   | 0.30 Ang.   |
| PLAT234_ALERT_4_B | Large Hirshfeld Difference                     | F8C                   | --C6C  | .   | 0.28 Ang.   |
| PLAT241_ALERT_2_B | High 'MainMol' Ueq as Compared to Neighbors of |                       |        |     | O14D Check  |
| PLAT260_ALERT_2_B | Large Average Ueq of Residue Including         |                       | F8DA   |     | 0.303 Check |

---

### 🟡 Alert level C

|                   |                                                  |                       |                         |         |            |
|-------------------|--------------------------------------------------|-----------------------|-------------------------|---------|------------|
| PLAT057_ALERT_3_C | Correction for Absorption Required               | RT(exp)               | ...                     | 1.12    | Do !       |
| PLAT213_ALERT_2_C | Atom O16B                                        | has ADP max/min Ratio | .....                   | 3.8     | prolat     |
| PLAT213_ALERT_2_C | Atom C15B                                        | has ADP max/min Ratio | .....                   | 3.4     | prolat     |
| PLAT215_ALERT_3_C | Disordered F1#                                   | has ADP max/min Ratio | .....                   | 3.4     | Note       |
| PLAT215_ALERT_3_C | Disordered F3#                                   | has ADP max/min Ratio | .....                   | 3.1     | Note       |
| PLAT215_ALERT_3_C | Disordered F4D                                   | has ADP max/min Ratio | .....                   | 3.4     | Note       |
| PLAT215_ALERT_3_C | Disordered F5D                                   | has ADP max/min Ratio | .....                   | 3.6     | Note       |
| PLAT215_ALERT_3_C | Disordered F8A                                   | has ADP max/min Ratio | .....                   | 3.4     | Note       |
| PLAT215_ALERT_3_C | Disordered F9D                                   | has ADP max/min Ratio | .....                   | 3.7     | Note       |
| PLAT215_ALERT_3_C | Disordered F13#                                  | has ADP max/min Ratio | .....                   | 4.0     | Note       |
| PLAT220_ALERT_2_C | Non-Solvent Resd 1                               | C                     | Ueq(max)/Ueq(min) Range |         | 3.8 Ratio  |
| PLAT220_ALERT_2_C | Non-Solvent Resd 1                               | F                     | Ueq(max)/Ueq(min) Range |         | 3.2 Ratio  |
| PLAT220_ALERT_2_C | Non-Solvent Resd 1                               | O                     | Ueq(max)/Ueq(min) Range |         | 4.6 Ratio  |
| PLAT230_ALERT_2_C | Hirshfeld Test Diff for                          | O16B                  | --C13B                  | .       | 5.3 s.u.   |
| PLAT234_ALERT_4_C | Large Hirshfeld Difference                       | F7DA                  | --C6D                   | .       | 0.22 Ang.  |
| PLAT234_ALERT_4_C | Large Hirshfeld Difference                       | F5C                   | --C3C                   | .       | 0.16 Ang.  |
| PLAT234_ALERT_4_C | Large Hirshfeld Difference                       | F8B                   | --C6B                   | .       | 0.16 Ang.  |
| PLAT234_ALERT_4_C | Large Hirshfeld Difference                       | F8D                   | --C6D                   | .       | 0.19 Ang.  |
| PLAT234_ALERT_4_C | Large Hirshfeld Difference                       | F9B                   | --C6B                   | .       | 0.18 Ang.  |
| PLAT234_ALERT_4_C | Large Hirshfeld Difference                       | F7AA                  | --C6A                   | .       | 0.18 Ang.  |
| PLAT234_ALERT_4_C | Large Hirshfeld Difference                       | F8AA                  | --C6A                   | .       | 0.19 Ang.  |
| PLAT234_ALERT_4_C | Large Hirshfeld Difference                       | C13D                  | --C18D                  | .       | 0.17 Ang.  |
| PLAT241_ALERT_2_C | High 'MainMol' Ueq as Compared to Neighbors of   |                       |                         |         | C6C Check  |
| PLAT241_ALERT_2_C | High 'MainMol' Ueq as Compared to Neighbors of   |                       |                         |         | C10B Check |
| PLAT242_ALERT_2_C | Low 'MainMol' Ueq as Compared to Neighbors of    |                       |                         |         | O1S Check  |
| PLAT242_ALERT_2_C | Low 'MainMol' Ueq as Compared to Neighbors of    |                       |                         |         | O14B Check |
| PLAT242_ALERT_2_C | Low 'MainMol' Ueq as Compared to Neighbors of    |                       |                         |         | O14C Check |
| PLAT242_ALERT_2_C | Low 'MainMol' Ueq as Compared to Neighbors of    |                       |                         |         | C3A Check  |
| PLAT242_ALERT_2_C | Low 'MainMol' Ueq as Compared to Neighbors of    |                       |                         |         | C3B Check  |
| PLAT242_ALERT_2_C | Low 'MainMol' Ueq as Compared to Neighbors of    |                       |                         |         | C12B Check |
| PLAT242_ALERT_2_C | Low 'MainMol' Ueq as Compared to Neighbors of    |                       |                         |         | C13B Check |
| PLAT260_ALERT_2_C | Large Average Ueq of Residue Including           |                       | Dy                      | 0.118   | Check      |
| PLAT260_ALERT_2_C | Large Average Ueq of Residue Including           |                       | C17B                    | 0.135   | Check      |
| PLAT342_ALERT_3_C | Low Bond Precision on                            | C-C Bonds             | .....                   | 0.00871 | Ang.       |
| PLAT360_ALERT_2_C | Short C(sp3)-C(sp3) Bond                         | C3C                   | - C6C                   | .       | 1.43 Ang.  |
| PLAT361_ALERT_2_C | Long C(sp3)-C(sp3) Bond                          | C13B                  | - C18B                  | ..      | 1.74 Ang.  |
| PLAT361_ALERT_2_C | Long C(sp3)-C(sp3) Bond                          | C13D                  | - C18D                  | ..      | 1.67 Ang.  |
| PLAT911_ALERT_3_C | Missing FCF Refl Between Thmin & STh/L=          |                       | 0.600                   | 112     | Report     |
| PLAT978_ALERT_2_C | Number C-C Bonds with Positive Residual Density. |                       |                         | 0       | Info       |

---

### 🟢 Alert level G

|                   |                                                  |      |       |       |           |
|-------------------|--------------------------------------------------|------|-------|-------|-----------|
| PLAT002_ALERT_2_G | Number of Distance or Angle Restraints on AtSite |      |       | 18    | Note      |
| PLAT154_ALERT_1_G | The s.u.'s on the Cell Angles are Equal ..(Note) |      |       | 0.001 | Degree    |
| PLAT172_ALERT_4_G | The CIF-Embedded .res File Contains DFIX Records |      |       | 6     | Report    |
| PLAT230_ALERT_2_G | Hirshfeld Test Diff for                          | F5DA | --C3D | .     | 6.1 s.u.  |
| PLAT230_ALERT_2_G | Hirshfeld Test Diff for                          | F7C  | --C6C | .     | 14.1 s.u. |

|                   |                                                  |           |                |       |              |
|-------------------|--------------------------------------------------|-----------|----------------|-------|--------------|
| PLAT230_ALERT_2_G | Hirshfeld Test Diff for                          | F8CA      | --C6C          | .     | 13.5 s.u.    |
| PLAT230_ALERT_2_G | Hirshfeld Test Diff for                          | F9A       | --C6A          | .     | 7.0 s.u.     |
| PLAT230_ALERT_2_G | Hirshfeld Test Diff for                          | F9AA      | --C6A          | .     | 18.4 s.u.    |
| PLAT242_ALERT_2_G | Low 'MainMol' Ueq as Compared to Neighbors of    |           |                |       | C3C Check    |
| PLAT242_ALERT_2_G | Low 'MainMol' Ueq as Compared to Neighbors of    |           |                |       | C3D Check    |
| PLAT242_ALERT_2_G | Low 'MainMol' Ueq as Compared to Neighbors of    |           |                |       | C6A Check    |
| PLAT242_ALERT_2_G | Low 'MainMol' Ueq as Compared to Neighbors of    |           |                |       | C6B Check    |
| PLAT242_ALERT_2_G | Low 'MainMol' Ueq as Compared to Neighbors of    |           |                |       | C6D Check    |
| PLAT300_ALERT_4_G | Atom Site Occupancy of                           | F4DA      | Constrained at |       | 0.5 Check    |
| PLAT300_ALERT_4_G | Atom Site Occupancy of                           | F5DA      | Constrained at |       | 0.5 Check    |
| PLAT300_ALERT_4_G | Atom Site Occupancy of                           | F7DA      | Constrained at |       | 0.5 Check    |
| PLAT300_ALERT_4_G | Atom Site Occupancy of                           | F4C       | Constrained at |       | 0.5 Check    |
| PLAT300_ALERT_4_G | Atom Site Occupancy of                           | F4D       | Constrained at |       | 0.5 Check    |
| PLAT300_ALERT_4_G | Atom Site Occupancy of                           | F9DA      | Constrained at |       | 0.5 Check    |
| PLAT300_ALERT_4_G | Atom Site Occupancy of                           | F5C       | Constrained at |       | 0.5 Check    |
| PLAT300_ALERT_4_G | Atom Site Occupancy of                           | F5D       | Constrained at |       | 0.5 Check    |
| PLAT300_ALERT_4_G | Atom Site Occupancy of                           | F4CA      | Constrained at |       | 0.5 Check    |
| PLAT300_ALERT_4_G | Atom Site Occupancy of                           | F5CA      | Constrained at |       | 0.5 Check    |
| PLAT300_ALERT_4_G | Atom Site Occupancy of                           | F7A       | Constrained at |       | 0.5 Check    |
| PLAT300_ALERT_4_G | Atom Site Occupancy of                           | F7C       | Constrained at |       | 0.5 Check    |
| PLAT300_ALERT_4_G | Atom Site Occupancy of                           | F7D       | Constrained at |       | 0.5 Check    |
| PLAT300_ALERT_4_G | Atom Site Occupancy of                           | F7CA      | Constrained at |       | 0.5 Check    |
| PLAT300_ALERT_4_G | Atom Site Occupancy of                           | F8A       | Constrained at |       | 0.5 Check    |
| PLAT300_ALERT_4_G | Atom Site Occupancy of                           | F8C       | Constrained at |       | 0.5 Check    |
| PLAT300_ALERT_4_G | Atom Site Occupancy of                           | F8D       | Constrained at |       | 0.5 Check    |
| PLAT300_ALERT_4_G | Atom Site Occupancy of                           | F8CA      | Constrained at |       | 0.5 Check    |
| PLAT300_ALERT_4_G | Atom Site Occupancy of                           | F9A       | Constrained at |       | 0.5 Check    |
| PLAT300_ALERT_4_G | Atom Site Occupancy of                           | F9C       | Constrained at |       | 0.5 Check    |
| PLAT300_ALERT_4_G | Atom Site Occupancy of                           | F9D       | Constrained at |       | 0.5 Check    |
| PLAT300_ALERT_4_G | Atom Site Occupancy of                           | F9CA      | Constrained at |       | 0.5 Check    |
| PLAT300_ALERT_4_G | Atom Site Occupancy of                           | F7AA      | Constrained at |       | 0.5 Check    |
| PLAT300_ALERT_4_G | Atom Site Occupancy of                           | F8AA      | Constrained at |       | 0.5 Check    |
| PLAT300_ALERT_4_G | Atom Site Occupancy of                           | F9AA      | Constrained at |       | 0.5 Check    |
| PLAT300_ALERT_4_G | Atom Site Occupancy of                           | F8DA      | Constrained at |       | 0.5 Check    |
| PLAT301_ALERT_3_G | Main Residue Disorder .....                      | (Resd 1 ) |                |       | 17% Note     |
| PLAT302_ALERT_4_G | Anion/Solvent/Minor-Residue Disorder (Resd 2 )   |           |                |       | 100% Note    |
| PLAT304_ALERT_4_G | Non-Integer Number of Atoms in .....             | Resd 1    |                |       | 115.50 Check |
| PLAT304_ALERT_4_G | Non-Integer Number of Atoms in .....             | Resd 2    |                |       | 0.50 Check   |
| PLAT343_ALERT_2_G | Unusual sp3 Angle Range in Main Residue for      |           |                |       | C13B Check   |
| PLAT344_ALERT_2_G | Unusual sp? Angle Range in Solvent/Ion for       |           |                |       | C17B Check   |
| PLAT398_ALERT_2_G | Deviating C-O-C Angle From 120 for O14D          |           |                |       | 104.8 Degree |
| PLAT398_ALERT_2_G | Deviating C-O-C Angle From 120 for O16C          |           |                |       | 109.7 Degree |
| PLAT432_ALERT_2_G | Short Inter X...Y Contact                        | F8DA      | ..C6D          |       | 1.73 Ang.    |
|                   |                                                  |           | x,y,z =        | 1_555 | Check        |
| PLAT432_ALERT_2_G | Short Inter X...Y Contact                        | F8DA      | ..C3D          |       | 2.19 Ang.    |
|                   |                                                  |           | x,y,z =        | 1_555 | Check        |
| PLAT432_ALERT_2_G | Short Inter X...Y Contact                        | F8DA      | ..C2D          |       | 2.95 Ang.    |
|                   |                                                  |           | x,y,z =        | 1_555 | Check        |
| PLAT432_ALERT_2_G | Short Inter X...Y Contact                        | O14B      | ..C17B         |       | 2.67 Ang.    |
|                   |                                                  |           | x,y,z =        | 1_555 | Check        |
| PLAT432_ALERT_2_G | Short Inter X...Y Contact                        | O16B      | ..C17B         |       | 1.78 Ang.    |
|                   |                                                  |           | x,y,z =        | 1_555 | Check        |
| PLAT432_ALERT_2_G | Short Inter X...Y Contact                        | C12B      | ..C17B         |       | 2.72 Ang.    |
|                   |                                                  |           | x,y,z =        | 1_555 | Check        |
| PLAT432_ALERT_2_G | Short Inter X...Y Contact                        | C13B      | ..C17B         |       | 2.15 Ang.    |
|                   |                                                  |           | x,y,z =        | 1_555 | Check        |
| PLAT720_ALERT_4_G | Number of Unusual/Non-Standard Labels .....      |           |                |       | 16 Note      |
| PLAT773_ALERT_2_G | Check long C-C Bond in CIF: C13B                 | --C18B    |                |       | 1.74 Ang.    |
| PLAT779_ALERT_4_G | Suspect or Irrelevant (Bond) Angle(s) in CIF . # |           |                |       | 163 Check    |
|                   | C13B -C18B -O16B                                 | 1.555     | 1.555          | 1.555 | 35.30 Deg.   |
| PLAT779_ALERT_4_G | Suspect or Irrelevant (Bond) Angle(s) in CIF . # |           |                |       | 266 Check    |
|                   | C6A -F9AA -C3A                                   | 1.555     | 1.555          | 1.555 | 44.90 Deg.   |

|                   |                                                  |               |             |
|-------------------|--------------------------------------------------|---------------|-------------|
| PLAT793_ALERT_4_G | Model has Chirality at C13A                      | (Centro SPGR) | R Verify    |
| PLAT793_ALERT_4_G | Model has Chirality at C13B                      | (Centro SPGR) | S Verify    |
| PLAT793_ALERT_4_G | Model has Chirality at C13D                      | (Centro SPGR) | R Verify    |
| PLAT794_ALERT_5_G | Tentative Bond Valency for Dy                    | (III)         | 3.17 Info   |
| PLAT860_ALERT_3_G | Number of Least-Squares Restraints               | .....         | 16 Note     |
| PLAT883_ALERT_1_G | No Info/Value for _atom_sites_solution_primary   | .             | Please Do ! |
| PLAT909_ALERT_3_G | Percentage of I>2sig(I) Data at Theta(Max)       | Still         | 89% Note    |
| PLAT910_ALERT_3_G | Missing # of FCF Reflection(s) Below Theta(Min). |               | 1 Note      |
| PLAT912_ALERT_4_G | Missing # of FCF Reflections Above STh/L=        | 0.600         | 20 Note     |
| PLAT933_ALERT_2_G | Number of OMIT Records in Embedded .res File     | ...           | 1 Note      |

---

0 **ALERT level A** = Most likely a serious problem - resolve or explain  
 10 **ALERT level B** = A potentially serious problem, consider carefully  
 39 **ALERT level C** = Check. Ensure it is not caused by an omission or oversight  
 68 **ALERT level G** = General information/check it is not something unexpected

2 ALERT type 1 CIF construction/syntax error, inconsistent or missing data  
 51 ALERT type 2 Indicator that the structure model may be wrong or deficient  
 16 ALERT type 3 Indicator that the structure quality may be low  
 47 ALERT type 4 Improvement, methodology, query or suggestion  
 1 ALERT type 5 Informative message, check

---

It is advisable to attempt to resolve as many as possible of the alerts in all categories. Often the minor alerts point to easily fixed oversights, errors and omissions in your CIF or refinement strategy, so attention to these fine details can be worthwhile. In order to resolve some of the more serious problems it may be necessary to carry out additional measurements or structure refinements. However, the purpose of your study may justify the reported deviations and the more serious of these should normally be commented upon in the discussion or experimental section of a paper or in the "special\_details" fields of the CIF. checkCIF was carefully designed to identify outliers and unusual parameters, but every test has its limitations and alerts that are not important in a particular case may appear. Conversely, the absence of alerts does not guarantee there are no aspects of the results needing attention. It is up to the individual to critically assess their own results and, if necessary, seek expert advice.

### Publication of your CIF in IUCr journals

A basic structural check has been run on your CIF. These basic checks will be run on all CIFs submitted for publication in IUCr journals (*Acta Crystallographica*, *Journal of Applied Crystallography*, *Journal of Synchrotron Radiation*); however, if you intend to submit to *Acta Crystallographica Section C* or *E* or *IUCrData*, you should make sure that full publication checks are run on the final version of your CIF prior to submission.

### Publication of your CIF in other journals

Please refer to the *Notes for Authors* of the relevant journal for any special instructions relating to CIF submission.

---

**PLATON version of 07/08/2019; check.def file version of 30/07/2019**

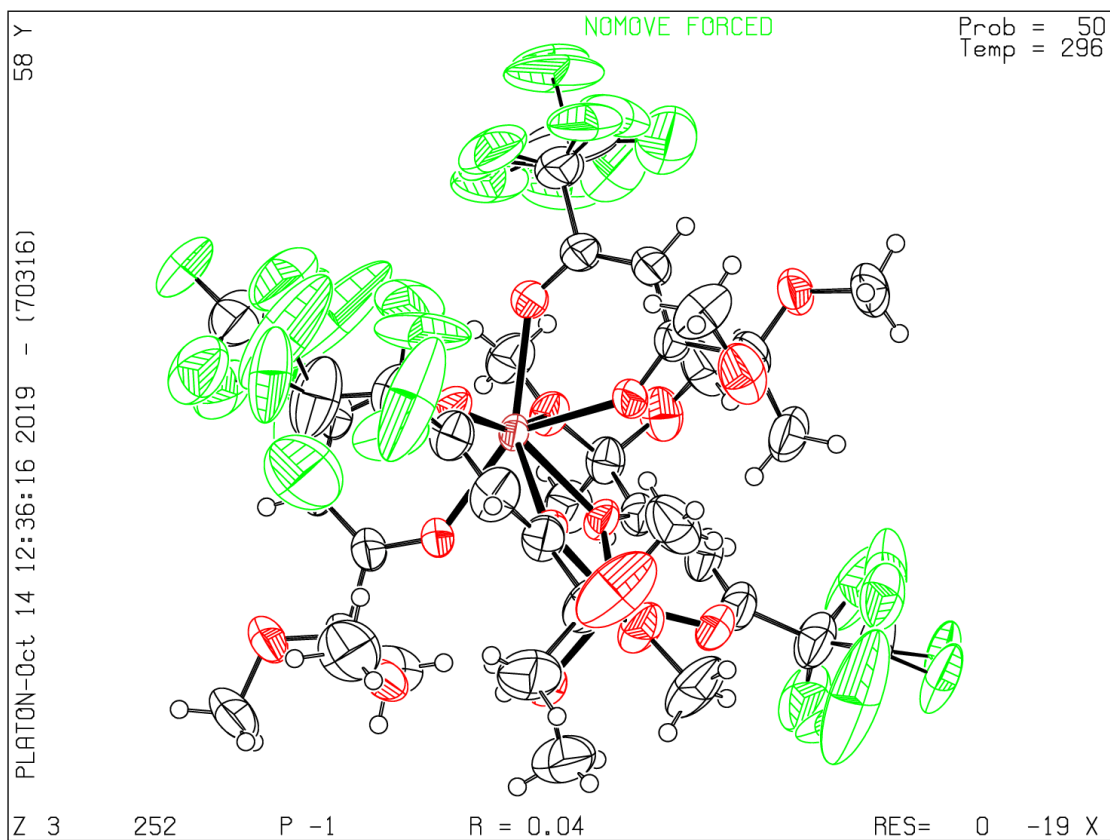

Supplement: s1 [file s1]
