# Supplementary material for: Perfluoroalkyl Chain Length Effect on Crystal Packing and [LnO8] Coordination Geometry in Lanthanide-Lithium β-Diketonates: Luminescence and Single-Ion Magnet Behavior
Source: MDPI journal article supplement (doi:10.3390/ijms24119778), 2023-06-05
Supplement: s1 [file s1]

## Supporting information

Perfluoroalkyl Chain Length Effect on Crystal Packing and [LnO<sub>8</sub>] Coordination Geometry in Lanthanide-Lithium β-Diketonates: Luminescence and Single-Ion Magnet Behavior

Kristina A. Smirnova<sup>1</sup>, Yulia O. Edilova<sup>2</sup>, Mikhail A. Kiskin<sup>3</sup>, Artem S. Bogomyakov<sup>1</sup>, Yulia S. Kudyakova<sup>2\*</sup>, Marina S. Valova<sup>2</sup>, Galina V. Romanenko<sup>1</sup>, Pavel A. Slepukhin<sup>2</sup>, Victor I. Saloutin<sup>2</sup> and Denis N. Bazhin<sup>2,4\*</sup>

<sup>1</sup> International Tomography Center, Siberian Branch of the Russian Academy of Sciences, 630090 Novosibirsk, Russian Federation

<sup>2</sup> Postovsky Institute of Organic Synthesis, Ural Branch of the Russian Academy of Sciences, 620137 Yekaterinburg, Russian Federation

<sup>3</sup> N.S. Kurnakov Institute of General and Inorganic Chemistry, Russian Academy of Sciences, 119991 Moscow, Russia

<sup>4</sup> Ural Federal University named after the First President of Russia B.N. Eltsin, Mira Str. 19, 620002, Ekaterinburg, Russian Federation

\* Correspondence: [yu.kudyakova@gmail.com](mailto:yu.kudyakova@gmail.com), [dnbazhin@gmail.com](mailto:dnbazhin@gmail.com)

**Table S1.** Crystallographic parameters and structure refinement statistics for 5-8.

| Code                                     | 5 (R <sup>F</sup> = C <sub>2</sub> F <sub>5</sub> )                 | 6 (R <sup>F</sup> = C <sub>2</sub> F <sub>5</sub> )                 | 8 (R <sup>F</sup> = C <sub>2</sub> F <sub>5</sub> )                 |
|------------------------------------------|---------------------------------------------------------------------|---------------------------------------------------------------------|---------------------------------------------------------------------|
| Compound                                 | [LiEu(L <sup>2</sup> ) <sub>4</sub> (MeOH)]                         | [LiGd(L <sup>2</sup> ) <sub>4</sub> (MeOH)]                         | [LiDy(L <sup>2</sup> ) <sub>4</sub> (MeOH)]                         |
| Formula                                  | C <sub>37</sub> H <sub>44</sub> EuF <sub>20</sub> LiO <sub>17</sub> | C <sub>37</sub> H <sub>44</sub> F <sub>20</sub> GdLiO <sub>17</sub> | C <sub>37</sub> H <sub>44</sub> DyF <sub>20</sub> LiO <sub>17</sub> |
| T (K)                                    | 250                                                                 | 250                                                                 | 296                                                                 |
| FW                                       | 1298.61                                                             | 1304.91                                                             | 1310.16                                                             |
| Space group                              | P-1                                                                 | P-1                                                                 | P-1                                                                 |
| Z                                        | 2                                                                   | 2                                                                   | 2                                                                   |
| a, Å                                     | 11.1129(4)                                                          | 11.1199(7)                                                          | 11.1190(3)                                                          |
| b, Å                                     | 11.3025(5)                                                          | 11.3337(7)                                                          | 11.3357(3)                                                          |
| c, Å                                     | 23.0437(8)                                                          | 23.0251(13)                                                         | 22.9094(6)                                                          |
| α, °                                     | 76.651(1)                                                           | 76.524(2)                                                           | 76.297(1)                                                           |
| β, °                                     | 77.617(1)                                                           | 77.560(2)                                                           | 77.360(1)                                                           |
| γ, °                                     | 71.897(1)                                                           | 71.625(2)                                                           | 71.388(1)                                                           |
| V, Å <sup>3</sup>                        | 2644.71(18)                                                         | 2646.2(3)                                                           | 2626.27(12)                                                         |
| d <sub>calc</sub> , g·cm <sup>-3</sup>   | 1.631                                                               | 1.638                                                               | 1.657                                                               |
| θ <sub>min</sub> -θ <sub>max</sub> (deg) | 1.926-39.381                                                        | 2.28-32.12                                                          | 4.021-67.679                                                        |
| μ(MoKα), mm <sup>-1</sup>                | 1.319                                                               | 1.386                                                               | 8.848                                                               |
| h,k,l                                    | -17 ≤ h ≤ 15<br>-17 ≤ k ≤ 16<br>-35 ≤ l ≤ 31                        | -15 ≤ h ≤ 15<br>-16 ≤ k ≤ 15<br>-32 ≤ l ≤ 32                        | -13 ≤ h ≤ 13<br>-13 ≤ k ≤ 13<br>-27 ≤ l ≤ 27                        |
| Number of reflections                    | 32552                                                               | 32956                                                               | 42708                                                               |
| Unique reflections                       | 18047                                                               | 16007                                                               | 9407                                                                |
| Reflections with I > 2σ(I)               | 11945                                                               | 11609                                                               | 8914                                                                |
| R <sub>int</sub>                         | 0.0314                                                              | 0.0399                                                              | 0.0306                                                              |
| F(000)                                   | 1294                                                                | 1298                                                                | 1302                                                                |
| Goof                                     | 1.030                                                               | 1.034                                                               | 1.037                                                               |
| R1 / wR2 for I > 2σI                     | 0.0744 / 0.2064                                                     | 0.0759 / 0.2049                                                     | 0.0402 / 0.1084                                                     |
| R1 / wR2 for all data                    | 0.1180 / 0.2389                                                     | 0.1034 / 0.2349                                                     | 0.0422 / 0.1103                                                     |
| CCDC                                     | 2258787                                                             | 2258788                                                             | 2255120                                                             |

**Table S1 (continued).** Crystallographic parameters and structure refinement statistics for **9-11**.

17

| Code                                    | <b>9</b> ( $R^F = C_3F_7$ )                                         | <b>10</b> ( $R^F = C_3F_7$ )                                        | <b>11</b> ( $R^F = C_3F_7$ )                                        |
|-----------------------------------------|---------------------------------------------------------------------|---------------------------------------------------------------------|---------------------------------------------------------------------|
| Compound                                | [LiEu(L <sup>3</sup> ) <sub>4</sub> (MeOH)]                         | [LiGd(L <sup>3</sup> ) <sub>4</sub> (MeOH)]                         | [LiTb(L <sup>3</sup> ) <sub>4</sub> (MeOH)]                         |
| Formula                                 | C <sub>41</sub> H <sub>44</sub> EuF <sub>28</sub> LiO <sub>17</sub> | C <sub>41</sub> H <sub>44</sub> F <sub>28</sub> GdLiO <sub>17</sub> | C <sub>41</sub> H <sub>44</sub> TbF <sub>28</sub> LiO <sub>17</sub> |
| T (K)                                   | 100(2)                                                              | 100(2)                                                              | 100                                                                 |
| FW                                      | 1499.66                                                             | 1504.95                                                             | 1506.62                                                             |
| Space group                             | P-1                                                                 | P-1                                                                 | P-1                                                                 |
| Z                                       | 2                                                                   | 2                                                                   | 2                                                                   |
| a, Å                                    | 10.5787(19)                                                         | 10.609(5)                                                           | 10.5527(4)                                                          |
| b, Å                                    | 12.147(3)                                                           | 12.079(4)                                                           | 12.1312(5)                                                          |
| c, Å                                    | 22.571(5)                                                           | 22.527(6)                                                           | 22.4916(8)                                                          |
| $\alpha$ , °                            | 98.146(14)                                                          | 99.318(9)                                                           | 98.494(1)                                                           |
| $\beta$ , °                             | 98.089(9)                                                           | 98.930(12)                                                          | 98.377(1)                                                           |
| $\gamma$ , °                            | 94.347(7)                                                           | 94.48(2)                                                            | 94.520(1)                                                           |
| V, Å <sup>3</sup>                       | 2829.0(10)                                                          | 2798.3(18)                                                          | 2802.49(19)                                                         |
| d <sub>calc</sub> , g·cm <sup>-3</sup>  | 1.761                                                               | 1.786                                                               | 1.785                                                               |
| $\theta_{\min}$ - $\theta_{\max}$ (deg) | 2.48-30.61                                                          | 2.30-31.13                                                          | 2.31-30.42                                                          |
| $\mu$ (MoK $\alpha$ ), mm <sup>-1</sup> | 1.265                                                               | 1.343                                                               | 1.420                                                               |
| h,k,l                                   | -15 ≤ h ≤ 15<br>-16 ≤ k ≤ 17<br>-32 ≤ l ≤ 32                        | -16 ≤ h ≤ 15<br>-14 ≤ k ≤ 18<br>-34 ≤ l ≤ 34                        | -14 ≤ h ≤ 13<br>-16 ≤ k ≤ 16<br>-30 ≤ l ≤ 30                        |
| Number of reflections                   | 31270                                                               | 33910                                                               | 27394                                                               |
| Unique reflections                      | 16954                                                               | 18970                                                               | 14368                                                               |
| Reflections with I > 2 $\sigma$ (I)     | 15536                                                               | 15394                                                               | 12791                                                               |
| R <sub>int</sub>                        | 0.0219                                                              | 0.0315                                                              | 0.0245                                                              |
| F(000)                                  | 1488                                                                | 1490                                                                | 1492                                                                |
| Goof                                    | 1.063                                                               | 1.082                                                               | 1.049                                                               |
| R1 / wR2 for I > 2 $\sigma$ I           | 0.0376 / 0.0978                                                     | 0.0572 / 0.1222                                                     | 0.0431 / 0.1075                                                     |
| R1 / wR2 for all data                   | 0.0423 / 0.0978                                                     | 0.0790 / 0.1325                                                     | 0.0501 / 0.1114                                                     |
| CCDC                                    | 2258789                                                             | 2258790                                                             | 2258791                                                             |

18

**Table S1 (continued).** Crystallographic parameters and structure refinement statistics for **12-14**.

19

| Code                                    | <b>12</b> ( $R^F = C_4F_9$ )                                        | <b>13</b> ( $R^F = C_4F_9$ )                                        | <b>14</b> ( $R^F = C_4F_9$ )                                        |
|-----------------------------------------|---------------------------------------------------------------------|---------------------------------------------------------------------|---------------------------------------------------------------------|
| Compound                                | [LiEu(L <sup>4</sup> ) <sub>4</sub> (MeOH)]                         | [LiGd(L <sup>4</sup> ) <sub>4</sub> (MeOH)]                         | [LiTb(L <sup>4</sup> ) <sub>4</sub> (MeOH)]                         |
| Formula                                 | C <sub>45</sub> H <sub>44</sub> EuF <sub>36</sub> LiO <sub>17</sub> | C <sub>45</sub> H <sub>44</sub> F <sub>36</sub> GdLiO <sub>17</sub> | C <sub>45</sub> H <sub>44</sub> TbF <sub>36</sub> LiO <sub>17</sub> |
| T (K)                                   | 100(2)                                                              | 100.0                                                               | 100.0                                                               |
| FW                                      | 1699.70                                                             | 1704.99                                                             | 1706.66                                                             |
| Space group                             | P-1                                                                 | P-1                                                                 | P-1                                                                 |
| Z                                       | 2                                                                   | 2                                                                   | 2                                                                   |
| a, Å                                    | 10.4566(4)                                                          | 10.4696(13)                                                         | 10.6905(6)                                                          |
| b, Å                                    | 13.7470(5)                                                          | 13.756(2)                                                           | 14.5385(8)                                                          |
| c, Å                                    | 22.4166(8)                                                          | 22.417(3)                                                           | 22.0395(12)                                                         |
| $\alpha$ , °                            | 98.2860(10)                                                         | 98.181(5)                                                           | 102.861(2)                                                          |
| $\beta$ , °                             | 100.4410(10)                                                        | 100.306(5)                                                          | 98.191(2)                                                           |
| $\gamma$ , °                            | 90.4630(10)                                                         | 90.527(6)                                                           | 105.287(2)                                                          |
| V, Å <sup>3</sup>                       | 3133.9(2)                                                           | 3142.1(8)                                                           | 3146.8(3)                                                           |
| d <sub>calc</sub> , g·cm <sup>-3</sup>  | 1.801                                                               | 1.802                                                               | 1.801                                                               |
| $\theta_{\min}$ - $\theta_{\max}$ (deg) | 2.34-33.08                                                          | 2.46-32.94                                                          | 2.422-30.57                                                         |
| $\mu$ (MoK $\alpha$ ), mm <sup>-1</sup> | 1.171                                                               | 1.226                                                               | 1.294                                                               |

|                            |                 |                 |                 |
|----------------------------|-----------------|-----------------|-----------------|
| h,k,l                      | -15 ≤ h ≤ 15    | -15 ≤ h ≤ 15    | -12 ≤ h ≤ 14    |
|                            | -21 ≤ k ≤ 19    | -18 ≤ k ≤ 20    | -19 ≤ k ≤ 19    |
|                            | -32 ≤ l ≤ 34    | -34 ≤ l ≤ 33    | -29 ≤ l ≤ 29    |
| Number of reflections      | 37710           | 38285           | 28413           |
| Unique reflections         | 21295           | 21278           | 15503           |
| Reflections with I > 2σ(I) | 17976           | 18791           | 14046           |
| R <sub>int</sub>           | 0.0256          | 0.0225          | 0.0207          |
| F(000)                     | 1680            | 1682            | 1684            |
| Goof                       | 1.049           | 1.050           | 1.052           |
| R1 / wR2 for I > 2σI       | 0.0534 / 0.1347 | 0.0453 / 0.1131 | 0.0368 / 0.0936 |
| R1 / wR2 for all data      | 0.0670 / 0.1429 | 0.0536 / 0.1184 | 0.0421 / 0.0936 |
| CCDC                       | 2258792         | 2258793         | 2258794         |

20

**Table S1 (continued).** Crystallographic parameters and structure refinement statistics for **15**.

21

| Code                                     | <b>15</b> (R <sup>F</sup> = C <sub>4</sub> F <sub>9</sub> )         |
|------------------------------------------|---------------------------------------------------------------------|
| Compound                                 | [LiDy(L <sup>4</sup> ) <sub>4</sub> (MeOH)]                         |
| Formula                                  | C <sub>45</sub> H <sub>44</sub> DyF <sub>36</sub> LiO <sub>17</sub> |
| T (K)                                    | 240                                                                 |
| FW                                       | 1710.24                                                             |
| Space group                              | P-1                                                                 |
| Z                                        | 2                                                                   |
| a, Å                                     | 11.0001(4)                                                          |
| b, Å                                     | 14.8467(5)                                                          |
| c, Å                                     | 22.0163(7)                                                          |
| α, °                                     | 102.473(2)                                                          |
| β, °                                     | 98.063(2)                                                           |
| γ, °                                     | 106.5187(17)                                                        |
| V, Å <sup>3</sup>                        | 3286.8(2)                                                           |
| d <sub>calc</sub> , g·cm <sup>-3</sup>   | 1.728                                                               |
| θ <sub>min</sub> -θ <sub>max</sub> (deg) | 3.22-66.83                                                          |
| μ(MoKα), mm <sup>-1</sup>                | 7.599                                                               |
| h,k,l                                    | -13 ≤ h ≤ 12                                                        |
|                                          | -17 ≤ k ≤ 17                                                        |
|                                          | -26 ≤ l ≤ 26                                                        |
| Number of reflections                    | 42583                                                               |
| Unique reflections                       | 11760                                                               |
| Reflections with I > 2σ(I)               | 10270                                                               |
| R <sub>int</sub>                         | 0.1380                                                              |
| F(000)                                   | 1686                                                                |
| Goof                                     | 1.055                                                               |
| R1 / wR2 for I > 2σI                     | 0.0821 / 0.2076                                                     |
| R1 / wR2 for all data                    | 0.0879 / 0.2144                                                     |
| CCDC                                     | 2255119                                                             |

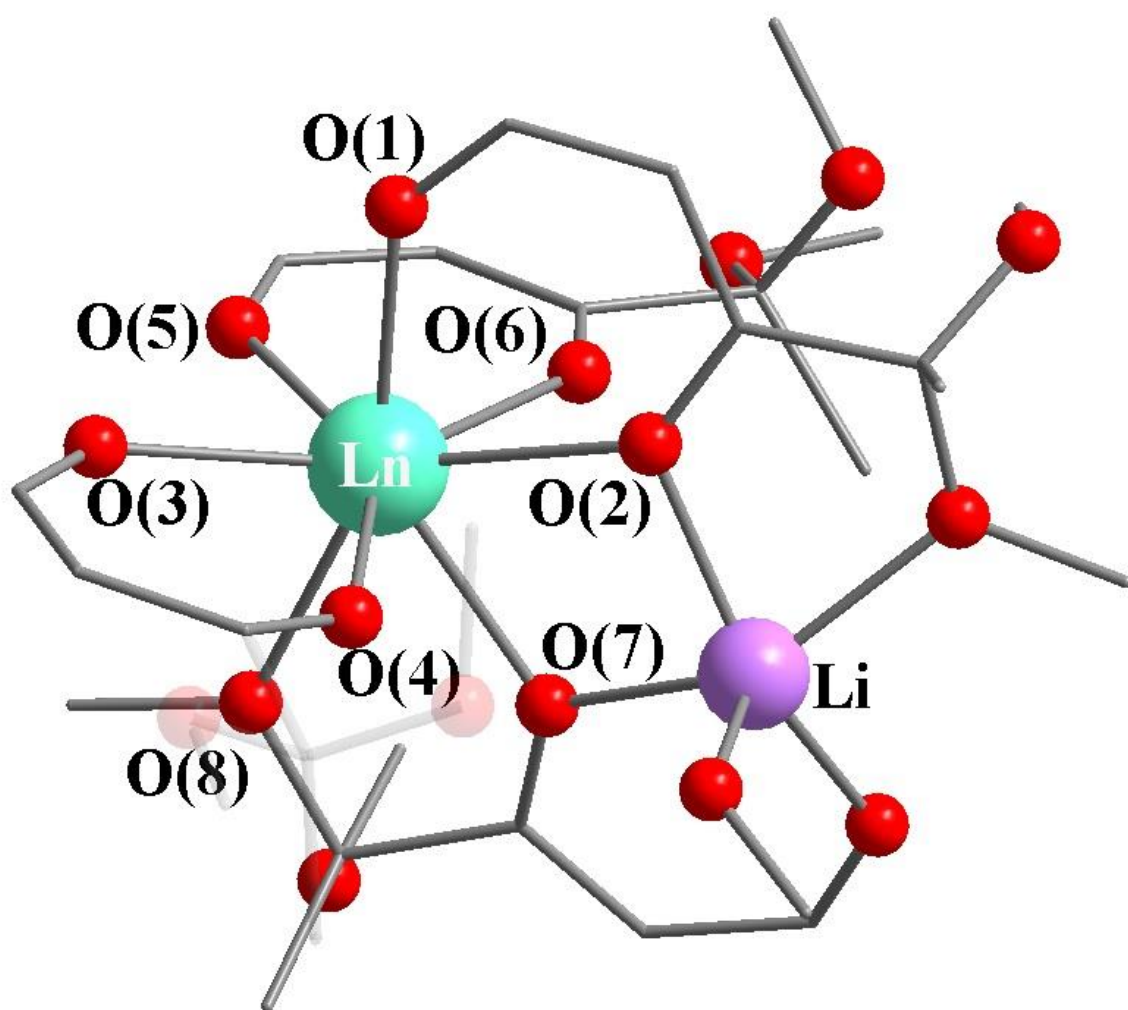

Figure S1 The structures of heterometallic framework of complexes 1-15

22

23

24

**Table S2.** Selected angles (°) in [Eu-Li]  $\beta$ -diketonates **1**, **5**, **9**, **12**.

25

| Eu tris-diketonate fragment            |                       |                       |                       |           |
|----------------------------------------|-----------------------|-----------------------|-----------------------|-----------|
|                                        | $\angle$ O(1)-Eu-O(2) | $\angle$ O(3)-Eu-O(4) | $\angle$ O(5)-Eu-O(6) |           |
| 1                                      | 70.66(14)             | 71.32(15)             | 70.33(17)             |           |
| 5                                      | 70.72(17)             | 71.39(16)             | 70.83(17)             |           |
| 9                                      | 74.58(36)/69.27(19)   | 71.39(6)              | 70.69(7)              |           |
| 12                                     | 71.68(8)              | 71.48(7)              | 70.99(8)              |           |
| Eu-Li heterometallic fragment          |                       |                       |                       |           |
|                                        | $\angle$ O(2)-Eu-O(7) | $\angle$ Eu-O(2)-Li   | $\angle$ Eu-O(7)-Li   |           |
| 1                                      | 67.99(13)             | 103.667(323)          | 104.72(35)            |           |
| 5                                      | 67.55(15)             | 103.22(41)            | 105.98(39)            |           |
| 9                                      | 66.53(7)              | 104.59(17)            | 106.04(16)            |           |
| 12                                     | 68.49(8)              | 103.72(18)            | 104.69(18)            |           |
| LiL coordination with EuL <sub>3</sub> |                       |                       |                       |           |
|                                        | 1                     | 5                     | 9                     | 12        |
| $\angle$ O(7)-Dy-O(8)                  | 61.83(12)             | 62.57(14)             | 61.88(6)              | 63.303(7) |

**Table S3.** Selected angles (°) in [Gd-Li]  $\beta$ -diketonates **2**, **6**, **10**, **13**.

26

| Gd <i>tris</i> -diketonate fragment    |                       |                       |                       |           |
|----------------------------------------|-----------------------|-----------------------|-----------------------|-----------|
|                                        | $\angle$ O(1)-Gd-O(2) | $\angle$ O(3)-Gd-O(4) | $\angle$ O(5)-Gd-O(6) |           |
| 2                                      | 71.05(16)°            | 71.58(16)°            | 70.89(19)°            |           |
| 6                                      | 70.72(17)°            | 71.394(16)°           | 70.83(17)°            |           |
| 10                                     | 71.29(11)             | 71.80(9)°             | 71.14(11)°            |           |
| 13                                     | 71.13(7)°             | 71.25(7)°             | 70.76(8)°             |           |
| Gd-Li heterometallic fragment          |                       |                       |                       |           |
|                                        | $\angle$ O(2)-Gd-O(7) | $\angle$ Gd-O(2)-Li   | $\angle$ Gd-O(7)-Li   |           |
| 2                                      | 68.18(16)°            | 103.44(38)°           | 104.55(40)°           |           |
| 6                                      | 67.55(15)°            | 103.22(41)°           | 105.98(39)°           |           |
| 10                                     | 66.73(10)°            | 104.34(24)°           | 106.48(25)°           |           |
| 13                                     | 67.54(7)°             | 103.63(17)°           | 105.49(18)°           |           |
| LiL coordination with GdL <sub>3</sub> |                       |                       |                       |           |
|                                        | 2                     | 6                     | 10                    | 13        |
| $\angle$ O(7)-Gd-O(8)                  | 61.99(15)°            | 62.57(14)°            | 62.86(10)°            | 62.44(8)° |

**Table S4.** Selected angles (°) in [Tb-Li]  $\beta$ -diketonates **3**, **7**, **11**, **14**.

27

| Tb tris-diketonate fragment            |                        |                       |                       |           |
|----------------------------------------|------------------------|-----------------------|-----------------------|-----------|
|                                        | $\angle$ O(1)-Tb-O(2)  | $\angle$ O(3)-Tb-O(4) | $\angle$ O(5)-Tb-O(6) |           |
| 3                                      | 71.45(14)°             | 71.904(144)°          | 71.240(174)°          |           |
| 7                                      | 71.22(17)°             | 71.747(165)°          | 71.077(156)°          |           |
| 11                                     | 74.88(35)°/68.93 (28)° | 71.908(77)°           | 71.100(96)°           |           |
| 14                                     | 70.84(8)°              | 71.029(78)°           | 70.522(89)°           |           |
| Tb-Li heterometallic fragment          |                        |                       |                       |           |
|                                        | $\angle$ O(2)-Tb-O(7)  | $\angle$ Tb-O(2)-Li   | $\angle$ Tb-O(7)-Li   |           |
| 3                                      | 68.38(14)°             | 102.67(36)°           | 104.21(38)°           |           |
| 7                                      | 68.37(15)°             | 103.27(40)°           | 105.91(39)°           |           |
| 11                                     | 66.81(8)°              | 104.70(22)°           | 106.63(23)°           |           |
| 14                                     | 67.51(8)°              | 103.60(21)°           | 105.37(22)°           |           |
| LiL coordination with TbL <sub>3</sub> |                        |                       |                       |           |
|                                        | 3                      | 7                     | 11                    | 14        |
| $\angle$ O(7)-Tb-O(8)                  | 62.45(14)°             | 62.85(15)°            | 62.50(8)°             | 62.23(9)° |

**Table S5.** Selected angles (°) in [Dy-Li]  $\beta$ -diketonates **4,8,15,16**.

28

| Dy tris-diketonate fragment            |                       |                       |                       |           |
|----------------------------------------|-----------------------|-----------------------|-----------------------|-----------|
|                                        | $\angle$ O(1)-Dy-O(2) | $\angle$ O(3)-Dy-O(4) | $\angle$ O(5)-Dy-O(6) |           |
| 4                                      | 71.75(15)°            | 72.22(16)°            | 71.27(19)°            |           |
| 8                                      | 71.45(10)°            | 72.11(11)°            | 71.57(10)°            |           |
| 15                                     | 71.62(16)°            | 71.63(15)°            | 71.37(17)°            |           |
| 16                                     | 71.58(8)°             | 72.48(8)°             | 70.77(8)°             |           |
| Dy-Li heterometallic fragment          |                       |                       |                       |           |
|                                        | $\angle$ O(2)-Dy-O(7) | $\angle$ Dy-O(2)-Li   | $\angle$ Dy-O(7)-Li   |           |
| 4                                      | 68.42(15)°            | 103.00(37)°           | 104.60(43)°           |           |
| 8                                      | 68.18(8)°             | 103.76(24)°           | 106.11(23)°           |           |
| 15                                     | 69.09(15)°            | 103.24(39)°           | 104.93(38)°           |           |
| 16                                     | 67.52(7)°             | 104.35(18)°           | 106.29(18)°           |           |
| LiL coordination with DyL <sub>3</sub> |                       |                       |                       |           |
|                                        | 4                     | 8                     | 15                    | 16        |
| $\angle$ O(8)-Dy-O(7)                  | 62.69(15)°            | 63.37(9)°             | 63.43(15)°            | 63.40(7)° |

**Table S6.** Selected bond distances in [Eu-Li]  $\beta$ -diketonates **1, 5, 9, 12**.

29

| Parameter, Å | <b>1</b> (R <sup>F</sup> = CF <sub>3</sub> ) | <b>5</b> (R <sup>F</sup> = C <sub>2</sub> F <sub>5</sub> ) | <b>9</b> (R <sup>F</sup> = C <sub>3</sub> F <sub>7</sub> ) | <b>12</b> (R <sup>F</sup> = C <sub>4</sub> F <sub>9</sub> ) |
|--------------|----------------------------------------------|------------------------------------------------------------|------------------------------------------------------------|-------------------------------------------------------------|
| Li–O         | 1.93(1)–2.02(1)                              | 1.9095(139)–2.0993(163)                                    | 1.928(46)–2.015(5)                                         | 1.917(7)–2.030(8)                                           |
| Eu–O         | 2.335(5)–2.399(5)                            | 2.3332(59)–2.3635(44)                                      | 2.287(14)–2.380(2)/<br>2.262(2)–2.393(8)                   | 2.329(2)–2.402(3)                                           |
| Eu–O(2)      | 2.426(3)                                     | 2.429(4)                                                   | 2.440(2)                                                   | 2.432(3)                                                    |
| Eu–O(8)      | 2.534(4)                                     | 2.501(5)                                                   | 2.521(2)                                                   | 2.517(3)                                                    |
| Li...Eu      | 3.498(11)                                    | 3.500(11)                                                  | 3.534(5)                                                   | 3.491(7)                                                    |
| Eu...Eu      | 10.5273(5)                                   | 11.1129(5)                                                 | 10.579(2)                                                  | 10.457(5)                                                   |
|              | 11.2632(5)                                   | 11.3025(6)                                                 | 11.088(2)                                                  | 10.8817(7)                                                  |
|              | 12.1561(7)                                   | 11.6611(7)                                                 | 12.147(3)                                                  | 12.3805(7)                                                  |
|              | 12.2251(5)                                   | 12.0714(7)                                                 | 12.606(3)                                                  | 13.7470(6)                                                  |
|              | 12.4277(5)                                   | 13.4775(6)                                                 | 12.655(3)                                                  |                                                             |
|              | 13.0570(5)                                   |                                                            |                                                            |                                                             |

**Table S7.** Selected bond distances in [Gd-Li]  $\beta$ -diketonates **2, 6, 10, 13**.

30

| Parameter, Å | <b>2</b> (R <sup>F</sup> = CF <sub>3</sub> ) | <b>6</b> (R <sup>F</sup> = C <sub>2</sub> F <sub>5</sub> ) | <b>10</b> (R <sup>F</sup> = C <sub>3</sub> F <sub>7</sub> ) | <b>13</b> (R <sup>F</sup> = C <sub>4</sub> F <sub>9</sub> ) |
|--------------|----------------------------------------------|------------------------------------------------------------|-------------------------------------------------------------|-------------------------------------------------------------|
| Li–O         | 1.940(15)–2.033(13)                          | 1.931(13)–2.086(15)                                        | 1.922(7)–2.034(8)                                           | 1.913(5)–2.025(6)                                           |
| Gd–O         | 2.322(6)–2.380(6)                            | 2.315(6)–2.364(5)                                          | 2.331(4)–2.394(3)                                           | 2.322(2)–2.397(2)                                           |
| Gd–O(2)      | 2.411(5)                                     | 2.417(4)                                                   | 2.428(3)                                                    | 2.424(2)                                                    |
| Gd–O(8)      | 2.529(5)                                     | 2.496(5)                                                   | 2.501(3)                                                    | 2.506(2)                                                    |
| Li...Gd      | 3.479(12)                                    | 3.491(11)                                                  | 3.514(7)                                                    | 3.484(6)                                                    |
| Gd...Gd      | 10.5643(6)                                   | 11.1199(8)                                                 | 10.609(5)                                                   | 10.470(1)                                                   |
|              | 11.2950(6)                                   | 11.3337(9)                                                 | 11.005(3)                                                   | 10.902(2)                                                   |
|              | 12.2645(7)                                   | 11.6509(8)                                                 | 12.079(4)                                                   | 12.360(2)                                                   |
|              | 12.4283(6)                                   | 12.04228(8)                                                | 12.539(3)                                                   | 12.400(2)                                                   |
|              | 13.0551(6)                                   | 14.0594(9)                                                 | 12.596(3)                                                   | 14.277(2)                                                   |

31

32

**Table S8.** Selected bond distances in [Tb-Li]  $\beta$ -diketonates **3,7,11,14**.

33

| Parameter, Å | <b>3</b> ( $R^F = CF_3$ ) | <b>7</b> ( $R^F = C_2F_5$ ) | <b>11</b> ( $R^F = C_3F_7$ )              | <b>14</b> ( $R^F = C_4F_9$ ) |
|--------------|---------------------------|-----------------------------|-------------------------------------------|------------------------------|
| Li–O         | 1.930(15)–2.042(12)       | 1.939(14)–2.069(15)         | 1.913(7)–2.030(8)                         | 1.922(4)–2.050(6)            |
| Tb–O         | 2.301(4)–2.371(6)         | 2.291(6)–2.356(4)           | 2.251(13)–2.375(3)/<br>2.332(2)–2.380(11) | 2.316(2)–2.365(2)            |
| Tb–O(2)      | 2.4040(32)                | 2.4079(39)                  | 2.407(2)                                  | 2.394(2)                     |
| Tb–O(8)      | 2.5057(36)                | 2.4933(54)                  | 2.484(2)                                  | 2.460(2)                     |
| Li...Tb      | 3.4711(118)               | 3.4856(106)                 | 3.515(7)                                  | 3.469(5)                     |
| Tb...Tb      | 10.5516(5)                | 11.1199(6)                  | 10.5527(5)                                | 10.6905(7)                   |
|              | 11.2525(6)                | 11.5161(7)                  | 11.0231(7)                                | 11.1753(8)                   |
|              | 12.1678(7)                | 11.5588(6)                  | 12.1312(6)                                | 12.3621(9)                   |
|              | 12.1989(4)                | 11.9528(6)                  | 12.5623(7)                                | 12.3621(8)                   |
|              | 12.3967(5)                | 13.4494(7)                  |                                           | 14.5385(9)                   |
|              | 12.9985(5)                |                             |                                           |                              |

**Table S9.** Selected bond distances in [Dy-Li]  $\beta$ -diketonates **4,8,15,16**.

34

| Parameter | <b>4</b> ( $R^F = CF_3$ ) | <b>8</b> ( $R^F = C_2F_5$ ) | <b>15</b> ( $R^F = C_4F_9$ ) | <b>16</b> ( $R^F = CF_3$ ) |
|-----------|---------------------------|-----------------------------|------------------------------|----------------------------|
| Li–O      | 1.939(17)–2.041(13)       | 1.925(9)–2.030(9)           | 1.924(10)–2.054(14)          | 1.924(7)–2.047(6)          |
| Dy–O      | 2.297(6)–2.357(6)         | 2.220(4)–2.330(3)           | 2.298(4)–2.355(5)            | 2.311(2)–2.363(2)          |
| Dy–O(2)   | 2.395(3)                  | 2.390(2)                    | 2.392(5)                     | 2.383(2)                   |
| Dy–O(8)   | 2.506(5)                  | 2.465(3)                    | 2.464(5)                     | 2.496(2)                   |
| Li...Dy   | 3.452(13)                 | 3.485(7)                    | 3.462(10)                    | 3.462(5)                   |
| Dy...Dy   | 10.6105(5)                | 11.1190(5)                  | 11.0001(6)                   | 9.6333(3)                  |
|           | 11.3166(5)                | 11.3357(5)                  | 11.1695(7)                   | 11.2038(3)                 |
|           | 12.2197(5)                | 11.5825(6)                  | 12.1864(7)                   | 11.3081(3)                 |
|           | 12.3203(5)                | 11.9606(6)                  | 14.8467(7)                   | 11.9719(3)                 |
|           | 12.4237(5)                | 13.1025(4)                  |                              | 12.2177(3)                 |
|           | 13.0283(5)                | 13.4274(6)                  |                              | 12.4342(3)                 |

35

**Table S10.** Continuous shape measures (CShM) calculations values for **Eu-Li** complexes using SHAPE.

36

|                                                                    | <b>1</b> ( $R^F = CF_3$ ) | <b>5</b> ( $R^F = C_2F_5$ ) | <b>9</b> ( $R^F = C_3F_7$ ) | <b>12</b> ( $R^F = C_4F_9$ ) |
|--------------------------------------------------------------------|---------------------------|-----------------------------|-----------------------------|------------------------------|
| Octagon (OP-8), $D_{8h}$                                           | 32.224                    | 32.856                      | 34.587/32.323               | 33.967                       |
| Heptagonal pyramid (HPY-8), $C_{7v}$                               | 23.884                    | 24.163                      | 22.148/22.232               | 23.251                       |
| Hexagonal bipyramid (HBPY-8), $D_{6h}$                             | 15.728                    | 16.147                      | 13.389/14.363               | 14.676                       |
| Cube (CU-8), $O_h$                                                 | 11.618                    | 11.967                      | 10.677/10.505               | 11.695                       |
| Square antiprism (SAPR-8), $D_{4d}$                                | 2.160                     | 2.847                       | 3.798/2.649                 | 3.338                        |
| Triangular dodecahedron (TDD-8), $D_{2d}$                          | 1.315                     | 1.055                       | 2.707/2.473                 | 2.015                        |
| Johnson gyrobifastigium J26<br>(JGBF-8), $D_{2d}$                  | 12.782                    | 12.498                      | 11.429/12.226               | 12.265                       |
| Johnson elongated triangular bipyramid J14<br>(JETBPY-8), $D_{3h}$ | 29.730                    | 28.943                      | 26.849/26.889               | 27.553                       |
| Biaugmented trigonal prism J50 (JBTPR-8), $C_{2v}$                 | 2.523                     | 2.665                       | 2.825/2.486                 | 2.673                        |
| Biaugmented trigonal prism (BTPR-8), $C_{2v}$                      | 1.983                     | 2.123                       | 2.052/1.877                 | 1.932                        |
| Snub diphenoid J84 (JSD-8), $D_{2d}$                               | 3.755                     | 3.293                       | 4.958/4.538                 | 4.285                        |
| Triakis tetrahedron (TT-8), $T_d$                                  | 12.252                    | 12.748                      | 11.275/11.048               | 12.312                       |
| Elongated trigonal bipyramid (ETBPY-8), $D_{3h}$                   | 24.267                    | 25.082                      | 22.949/21.895               | 23.725                       |

**Table S11.** Continuous shape measures (CSHM) calculations values for **Gd-Li** complexes using SHAPE.

37

|                                                                    | <b>2</b> ( $R^F = CF_3$ ) | <b>6</b> ( $R^F = C_2F_5$ ) | <b>10</b> ( $R^F = C_3F_7$ ) | <b>13</b> ( $R^F = C_4F_9$ ) |
|--------------------------------------------------------------------|---------------------------|-----------------------------|------------------------------|------------------------------|
| Octagon (OP-8), $D_{8h}$                                           | 31.854                    | 32.825                      | 33.555                       | 33.771                       |
| Heptagonal pyramid (HPY-8), $C_{7v}$                               | 23.920                    | 24.222                      | 22.833                       | 23.310                       |
| Hexagonal bipyramid (HBPY-8), $D_{6h}$                             | 15.908                    | 16.144                      | 14.092                       | 14.678                       |
| Cube (CU-8), $O_h$                                                 | 11.652                    | 11.873                      | 10.596                       | 11.657                       |
| Square antiprism (SAPR-8), $D_{4d}$                                | 2.015                     | 2.813                       | 2.978                        | 3.235                        |
| Triangular dodecahedron (TDD-8), $D_{2d}$                          | 1.253                     | 1.003                       | 2.370                        | 1.963                        |
| Johnson gyrobifastigium J26<br>(JGBF-8), $D_{2d}$                  | 12.969                    | 12.575                      | 12.158                       | 12.307                       |
| Johnson elongated triangular bipyramid J14<br>(JETBPY-8), $D_{3h}$ | 29.866                    | 29.062                      | 27.290                       | 27.618                       |
| Biaugmented trigonal prism J50 (JBTPR-8), $C_{2v}$                 | 2.487                     | 2.662                       | 2.435                        | 2.611                        |
| Biaugmented trigonal prism (BTPR-8), $C_{2v}$                      | 1.941                     | 2.101                       | 1.728                        | 1.868                        |
| Snub diphenoid J84 (JSD-8), $D_{2d}$                               | 3.691                     | 3.279                       | 4.625                        | 4.231                        |
| Triakis tetrahedron (TT-8), $T_d$                                  | 12.311                    | 12.674                      | 11.179                       | 12.279                       |
| Elongated trigonal bipyramid (ETBPY-8), $D_{3h}$                   | 24.342                    | 25.143                      | 23.780                       | 23.849                       |

**Table S12.** Continuous shape measures (CSHM) calculations values for **Tb-Li** complexes using SHAPE.

38

|                                                                    | <b>3</b> ( $R^F = CF_3$ ) | <b>7</b> ( $R^F = C_2F_5$ ) | <b>11</b> ( $R^F = C_3F_7$ ) | <b>14</b> ( $R^F = C_4F_9$ ) |
|--------------------------------------------------------------------|---------------------------|-----------------------------|------------------------------|------------------------------|
| Octagon (OP-8), $D_{8h}$                                           | 31.870                    | 32.867                      | 34.187/32.279                | 31.650                       |
| Heptagonal pyramid (HPY-8), $C_{7v}$                               | 24.096                    | 24.279                      | 22.277/22.527                | 23.701                       |
| Hexagonal bipyramid (HBPY-8), $D_{6h}$                             | 15.930                    | 16.122                      | 13.534/14.577                | 16.691                       |
| Cube (CU-8), $O_h$                                                 | 11.669                    | 11.724                      | 10.753/10.634                | 11.734                       |
| Square antiprism (SAPR-8), $D_{4d}$                                | 2.036                     | 2.752                       | 3.652/2.463                  | 3.152                        |
| Triangular dodecahedron (TDD-8), $D_{2d}$                          | 1.134                     | 0.986                       | 2.681/2.292                  | 0.947                        |
| Johnson gyrobifastigium J26<br>(JGBF-8), $D_{2d}$                  | 12.971                    | 12.703                      | 11.680/12.493                | 13.080                       |
| Johnson elongated triangular bipyramid J14<br>(JETBPY-8), $D_{3h}$ | 29.919                    | 29.116                      | 27.137/27.229                | 28.611                       |
| Biaugmented trigonal prism J50 (JBTPR-8), $C_{2v}$                 | 2.421                     | 2.558                       | 2.756/2.367                  | 3.151                        |
| Biaugmented trigonal prism (BTPR-8), $C_{2v}$                      | 1.902                     | 2.012                       | 1.966/1.764                  | 2.487                        |
| Snub diphenoid J84 (JSD-8), $D_{2d}$                               | 3.549                     | 3.322                       | 4.836/4.363                  | 3.292                        |
| Triakis tetrahedron (TT-8), $T_d$                                  | 12.500                    | 12.557                      | 11.386/11.181                | 12.551                       |
| Elongated trigonal bipyramid (ETBPY-8), $D_{3h}$                   | 24.569                    | 25.263                      | 23.213/22.207                | 24.838                       |

39

40



**Table S13.** Continuous shape measures (CShM) calculations values for **Dy-Li** complexes using SHAPE.

|                                                                    | <b>4</b> ( $R^F = CF_3$ ) | <b>8</b> ( $R^F = C_2F_5$ ) | <b>15</b> ( $R^F = C_4F_9$ ) | <b>16</b> ( $R^F = CF_3$ ) |
|--------------------------------------------------------------------|---------------------------|-----------------------------|------------------------------|----------------------------|
| Octagon (OP-8), $D_{8h}$                                           | 31.536                    | 32.726                      | 32.594                       | 32.204                     |
| Heptagonal pyramid (HPY-8), $C_{7v}$                               | 24.081                    | 24.468                      | 23.837                       | 21.911                     |
| Hexagonal bipyramid (HBPY-8), $D_{6h}$                             | 15.916                    | 16.193                      | 17.068                       | 13.248                     |
| Cube (CU-8), $O_h$                                                 | 11.638                    | 11.680                      | 11.349                       | 10.089                     |
| Square antiprism (SAPR-8), $D_{4d}$                                | 1.909                     | 2.790                       | 3.593                        | 3.487                      |
| Triangular dodecahedron (TDD-8), $D_{2d}$                          | 1.144                     | 0.894                       | 0.911                        | 1.777                      |
| Johnson gyrobifastigium J26<br>(JGBF-8), $D_{2d}$                  | 13.036                    | 12.646                      | 13.414                       | 11.748                     |
| Johnson elongated triangular bipyramid J14<br>(JETBPY-8), $D_{3h}$ | 30.086                    | 29.193                      | 28.794                       | 27.092                     |
| Biaugmented trigonal prism J50 (JBTPR-8), $C_{2v}$                 | 2.386                     | 2.597                       | 2.943                        | 2.851                      |
| Biaugmented trigonal prism (BTPR-8), $C_{2v}$                      | 1.862                     | 2.040                       | 2.255                        | 1.990                      |
| Snub diphenoid J84 (JSD-8), $D_{2d}$                               | 3.592                     | 3.149                       | 3.407                        | 4.053                      |
| Triakis tetrahedron (TT-8), $T_d$                                  | 12.407                    | 12.497                      | 12.127                       | 10.654                     |
| Elongated trigonal bipyramid (ETBPY-8), $D_{3h}$                   | 24.387                    | 25.436                      | 25.277                       | 22.407                     |

**Table S14.** Dihedral angles between the LnOO and  $\beta$ -diketonate (L) planes in the crystals of complexes.

| Dihedral angle<br>between planes ( $^\circ$ ) | $R^F = CF_3$<br>(1-4) | $R^F = C_2F_5$<br>(5-8) | $R^F = C_3F_7$<br>(9-11) | $R^F = C_4F_9$<br>(12-15) | $R^F = CF_3$<br>(16) |
|-----------------------------------------------|-----------------------|-------------------------|--------------------------|---------------------------|----------------------|
| EuOO-L(1)                                     | 12                    | 9                       | 13/8                     | 13                        |                      |
| EuOO-L(2)                                     | 3                     | 7                       | 23                       | 28                        |                      |
| EuOO-L(3)                                     | 5                     | 4                       | 0.7                      | 0.9                       | -                    |
| EuOO-L(bridging)                              | 10                    | 7                       | 13                       | 11                        |                      |
| sum of angles                                 | 30                    | 27                      | 50/45                    | 53                        |                      |
| GdOO-L(1)                                     | 11                    | 9                       | 12                       | 13                        |                      |
| GdOO-L(2)                                     | 3                     | 7                       | 23                       | 28                        |                      |
| GdOO-L(3)                                     | 5                     | 4                       | 1                        | 1                         | -                    |
| GdOO-L(bridging)                              | 13                    | 7                       | 8                        | 10                        |                      |
| sum of angles                                 | 32                    | 27                      | 44                       | 52                        |                      |
| TbOO-L(1)                                     | 12                    | 10                      | 14/9                     | 10                        |                      |
| TbOO-L(2)                                     | 4                     | 9                       | 22                       | 24                        |                      |
| TbOO-L(3)                                     | 4                     | 3                       | 1                        | 9                         | -                    |
| TbOO-L(bridging)                              | 13                    | 6                       | 12                       | 6                         |                      |
| sum of angles                                 | 33                    | 28                      | 49/44                    | 49                        |                      |
| DyOO-L(1)                                     | 11                    | 10                      |                          | 9                         | 12                   |
| DyOO-L(2)                                     | 3                     | 7                       |                          | 22                        | 10                   |
| DyOO-L(3)                                     | 5                     | 4                       | -                        | 8                         | 15                   |
| DyOO-L(bridging)                              | 10                    | 12                      |                          | 14                        | 1                    |
| sum of angles                                 | 29                    | 33                      |                          | 53                        | 38                   |

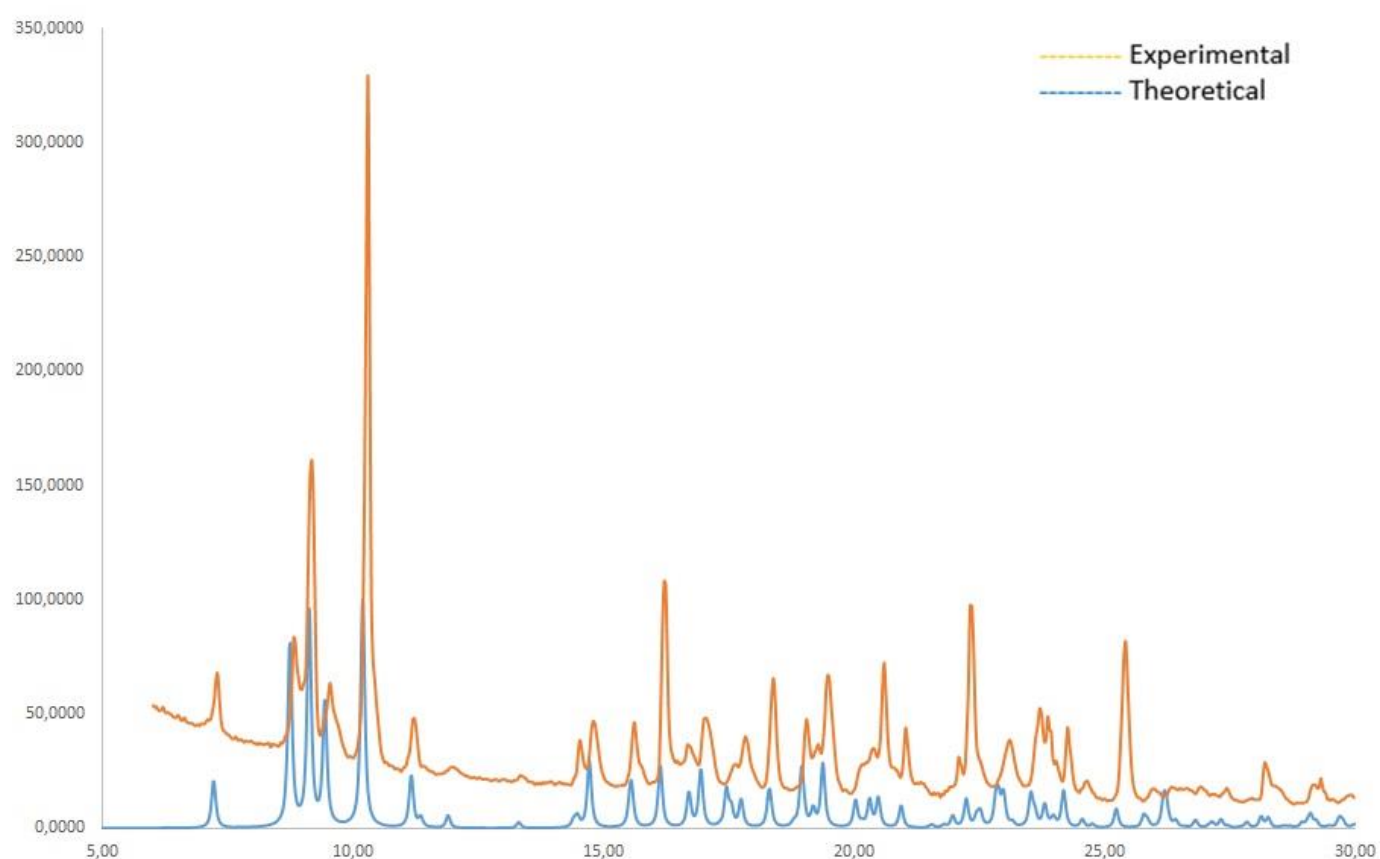

**Figure S2** .PXRD for CF<sub>3</sub>-β-diketonate **4** (yellow line – experimental, blue line – calculated (according to single crystal X-ray data))

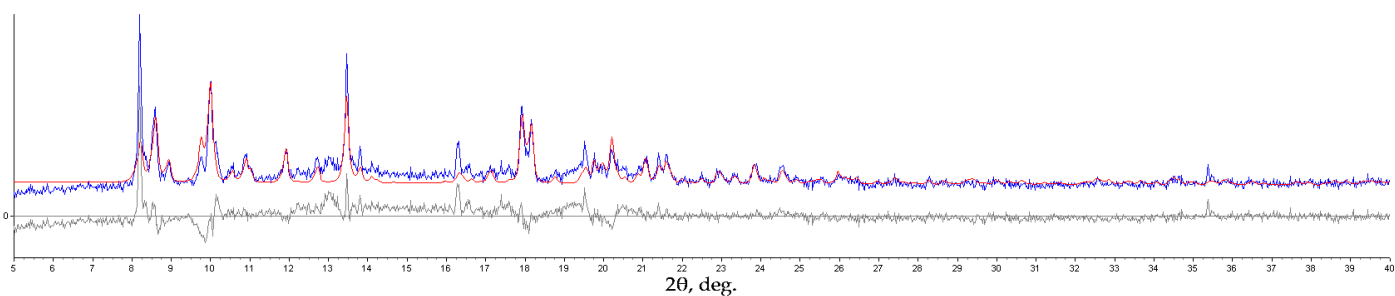

**Figure S3** .PXRD for C<sub>2</sub>F<sub>5</sub>-β-diketonate **7** (blue line – experimental; red line – calculated (using the TOPAS software [TOPAS Software. Version 4.2. Karlsruhe: Bruker AXS, 2009]))

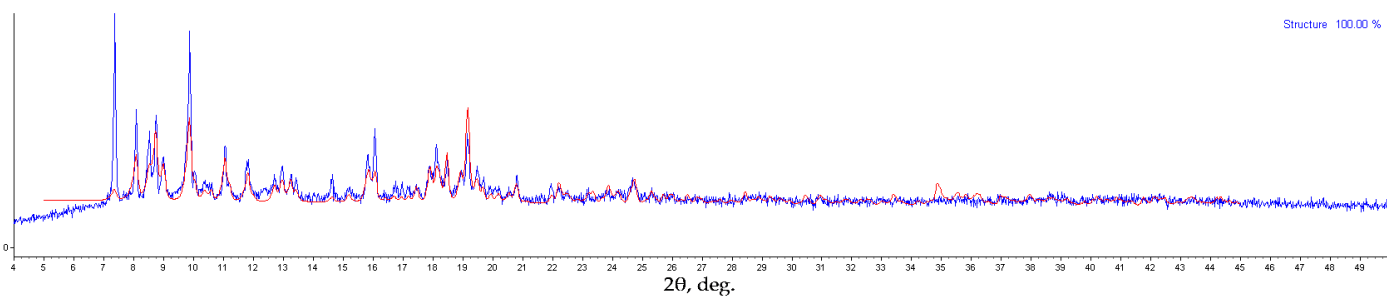

**Figure S4** .PXRD for C<sub>3</sub>F<sub>7</sub>-β-diketonate **10** (blue line – experimental; red line – calculated (using the TOPAS software [TOPAS Software. Version 4.2. Karlsruhe: Bruker AXS, 2009]))

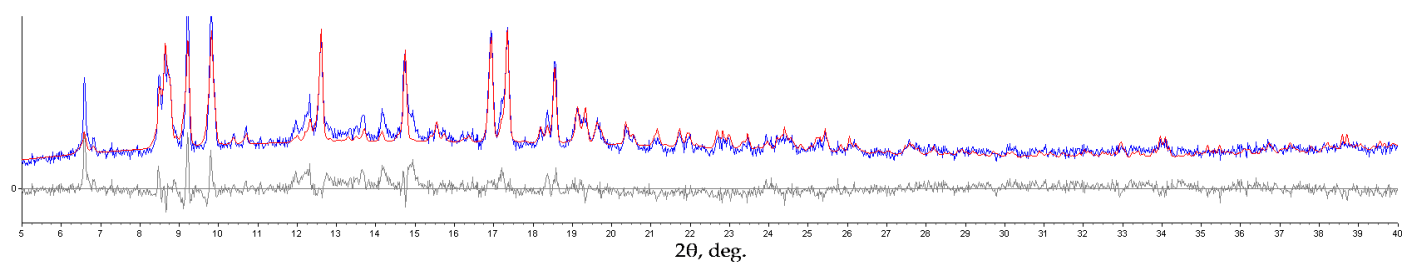

**Figure S5** .PXRD for  $\text{C}_4\text{F}_9$ - $\beta$ -diketonate **14** (blue line – experimental; red line – calculated (using the TOPAS software [TOPAS Software. Version 4.2. Karlsruhe: Bruker AXS, 2009]))

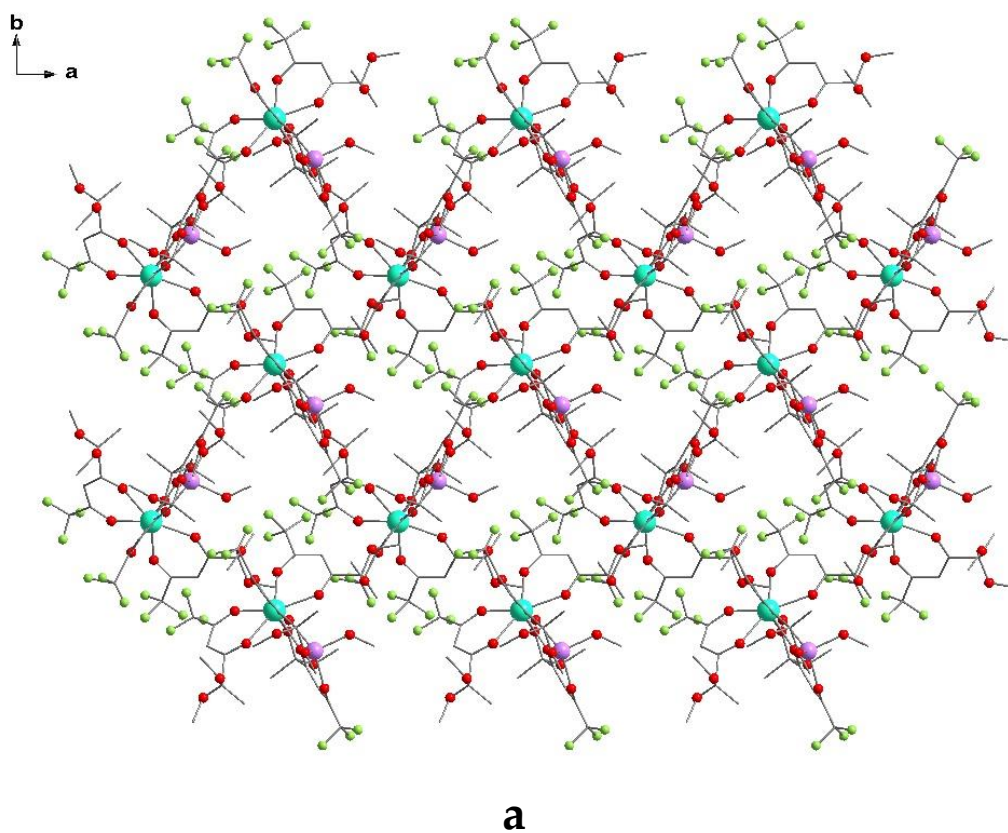

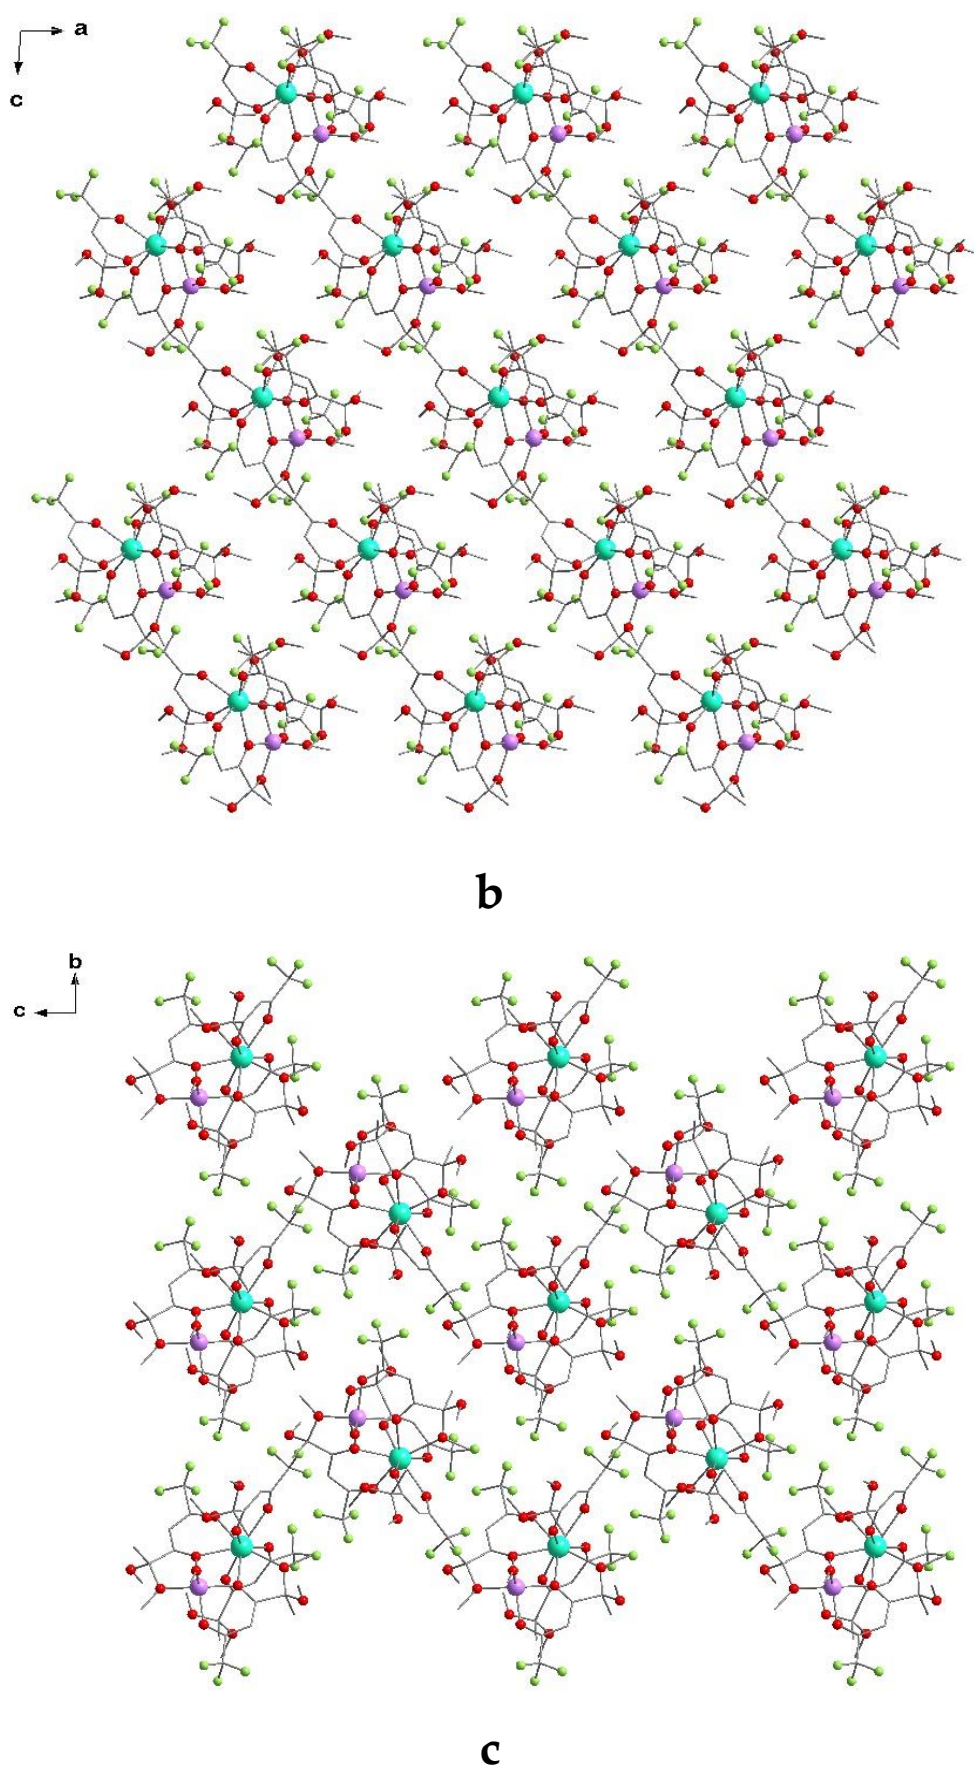

**Figure S6.** Crystal packing of trifluoromethylated Ln-Li  $\beta$ -diketonates **1-4** along *c* (**a**), *b* (**b**) and *a* (**c**) axis.

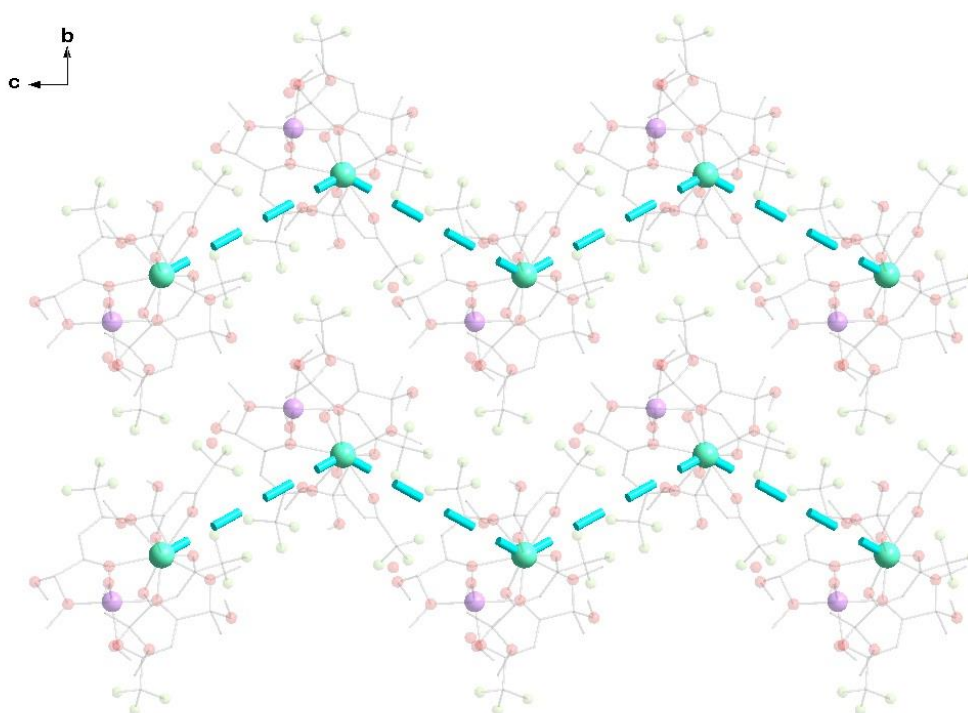

**Figure S7.** Two 1D chains of trifluoromethylated Ln-Li  $\beta$ -diketonates **1-4** with the shortest Ln...Ln distance (dashed line). Eu(1)...Eu(2) = 10.5273(5) Å, Gd(1)...Gd(2) = 10.5643(6) Å, Tb(1)...Tb(2) = 10.5516(5) Å, Dy(1)...Dy(2) = 10.6105(5) Å,  $\angle$ Eu(1)-Eu(2)-Eu(3) = 131.445(4)°,  $\angle$ Gd(1)-Gd(2)-Gd(3) = 131.411(4)°,  $\angle$ Tb(1)-Tb(2)-Tb(3) = 131.139(4)°,  $\angle$ Dy(1)-Dy(2)-Dy(3) = 130.966(4)°.

65

66

67

68

69



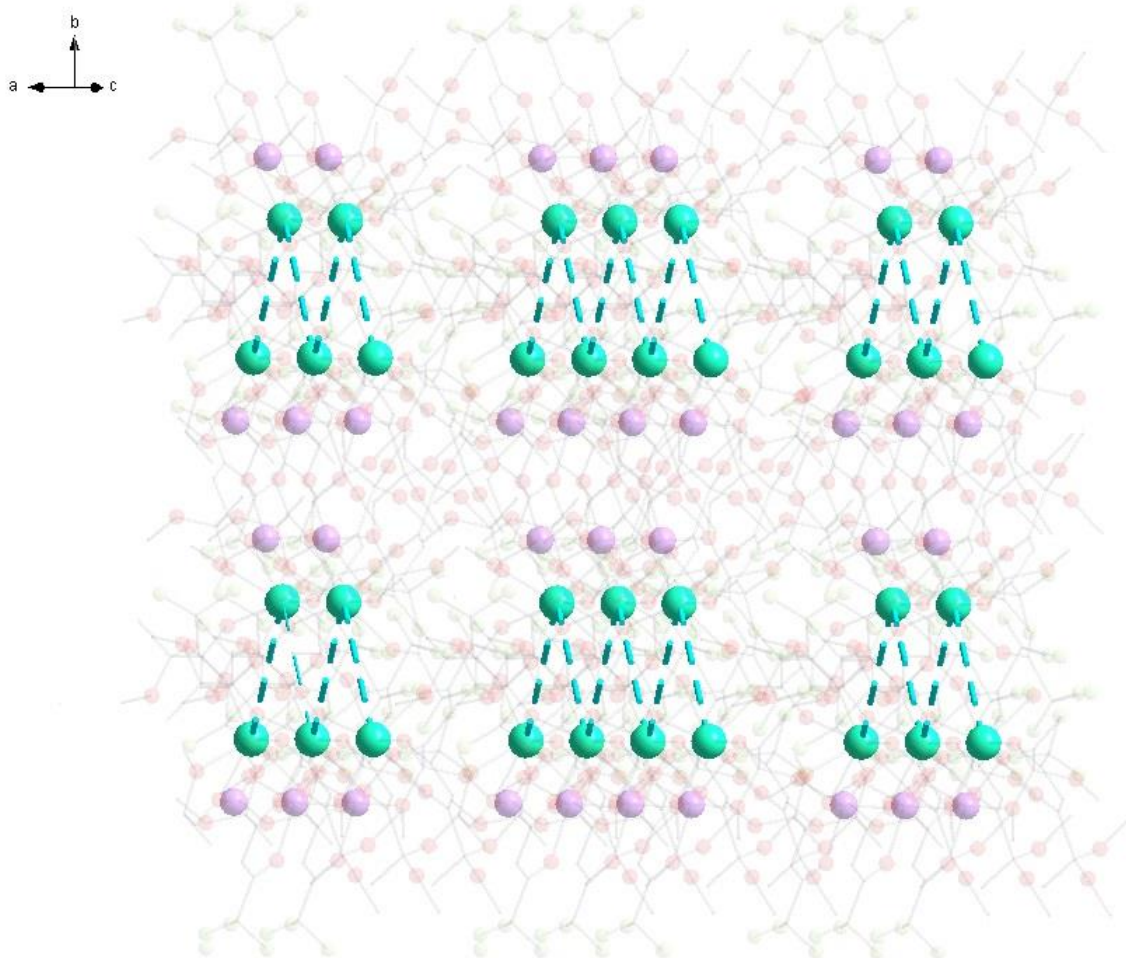

**Figure S8.** 1D chains packing of trifluoromethylated Ln-Li  $\beta$ -diketonates **1-4** with the shortest Ln...Ln distance (dashed line).

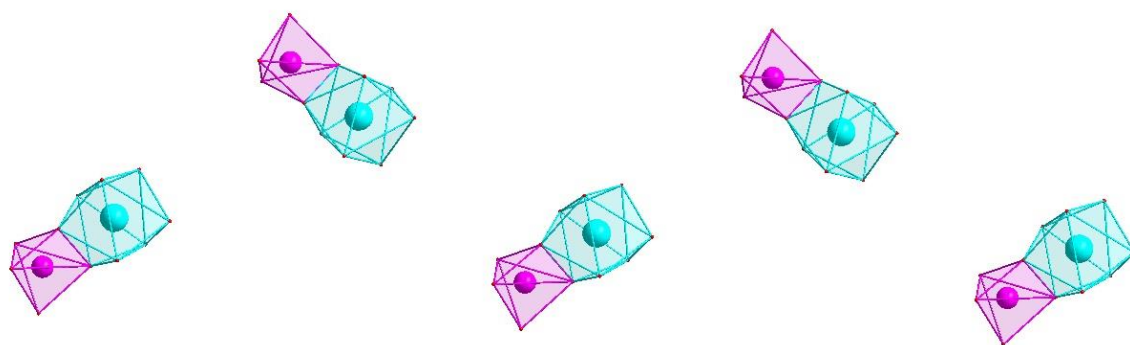

**Figure S9.** 1D chain of trifluoromethylated Ln-Li  $\beta$ -diketonates **1-4** (polyhedral [LnO<sub>8</sub>] and [LiO<sub>5</sub>] views only) with the shortest Ln...Ln distance.

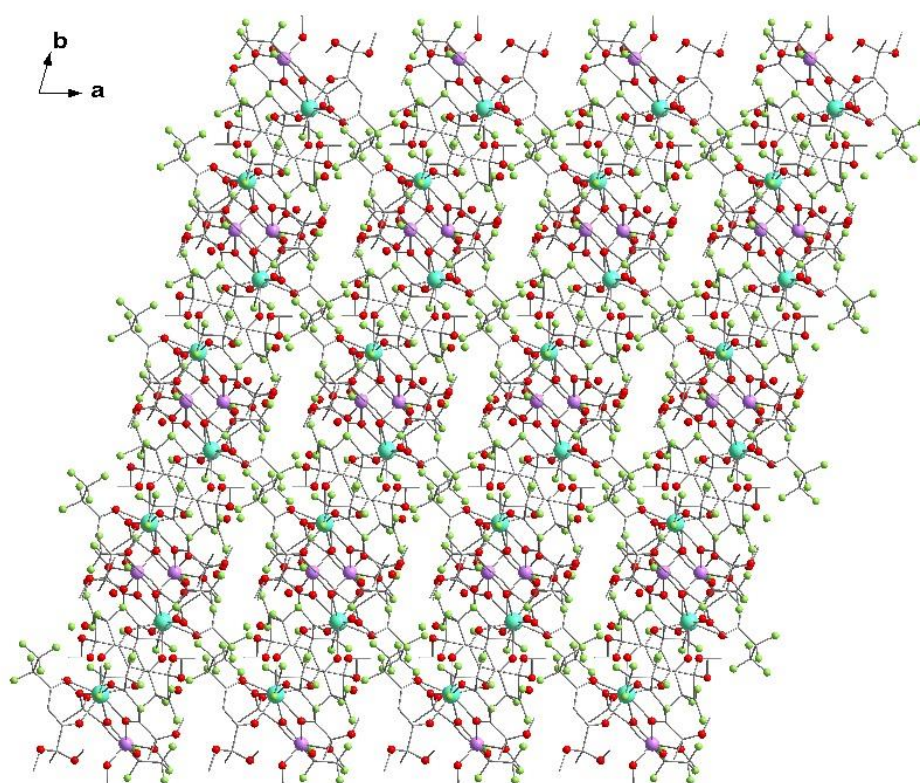**a**

77

78

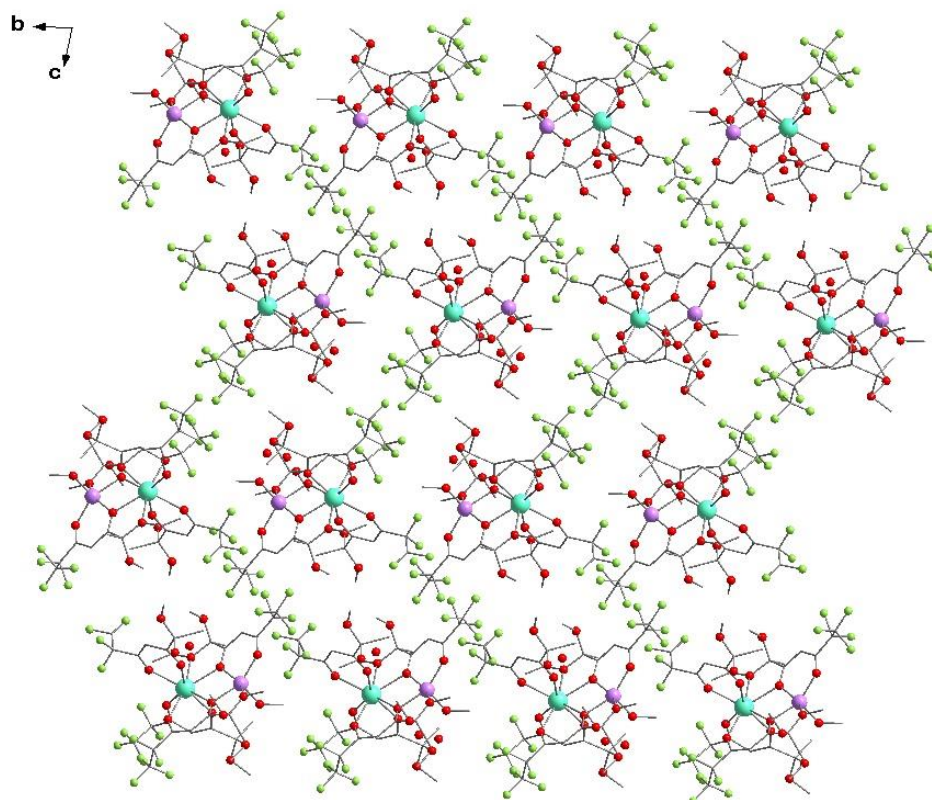**b**

79

80

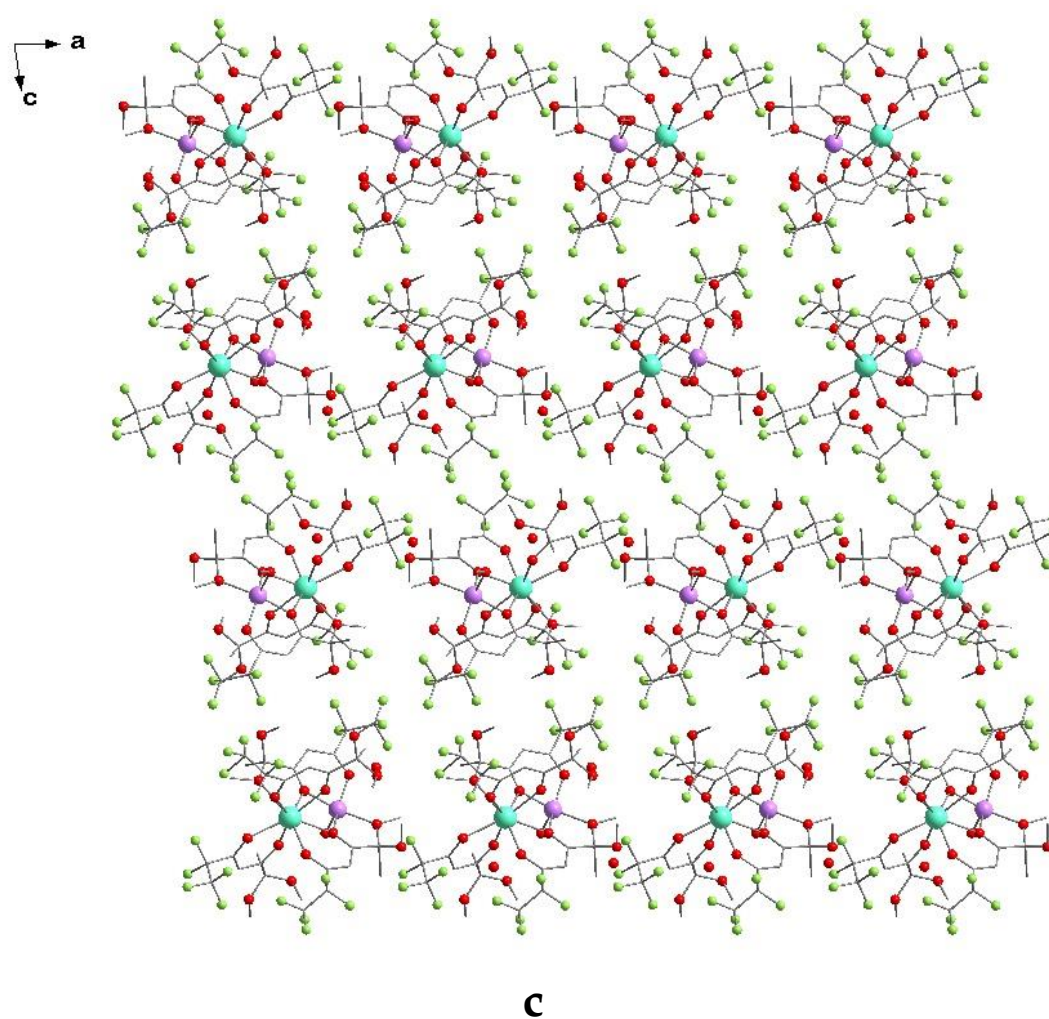

**Figure S10.** Crystal packing of C<sub>2</sub>F<sub>5</sub>-containing [Ln-Li] β-diketonates **5-8** along *c* (**a**), *a* (**b**) and *b* (**c**) axis.



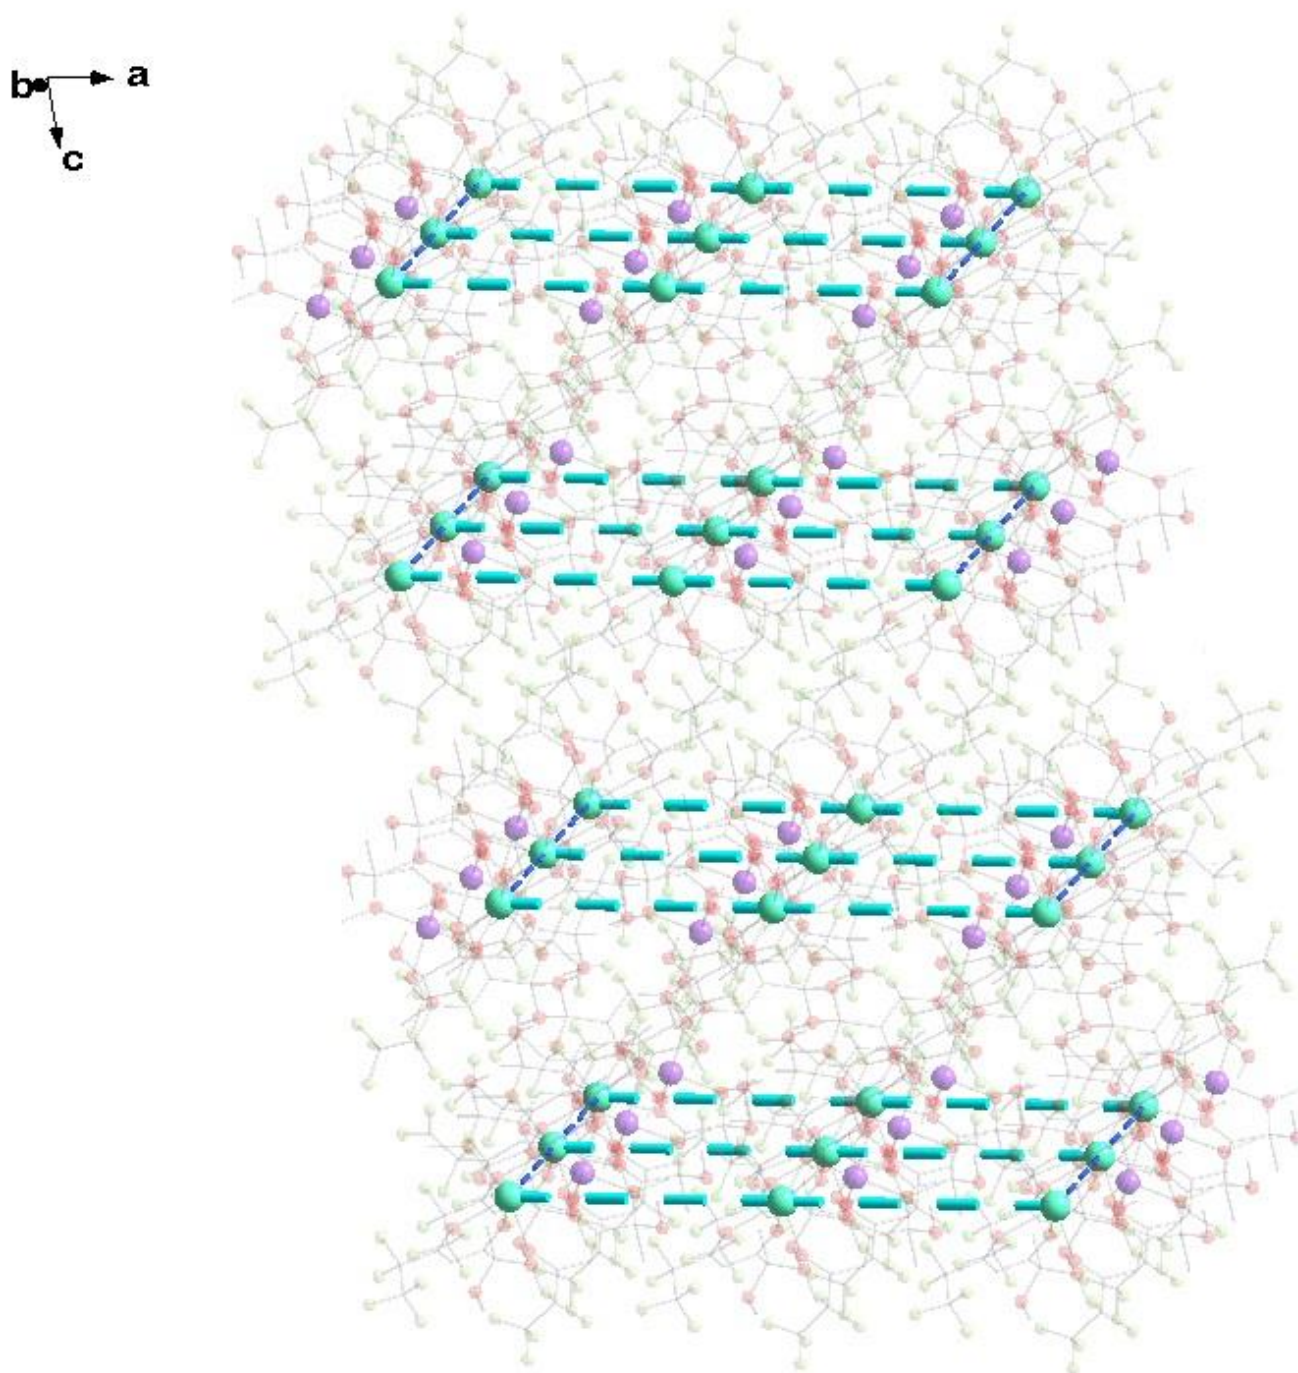

**Figure S11.** 1D chains assembly of C<sub>2</sub>F<sub>5</sub>-containing [Ln-Li] β-diketonates 5-8. d(Ln...Ln) ~ 11.1 Å (turquoise dashed line),  
d(Ln...Ln) ~ 11.3-11.5 Å (blue dashed line).

84

85

86

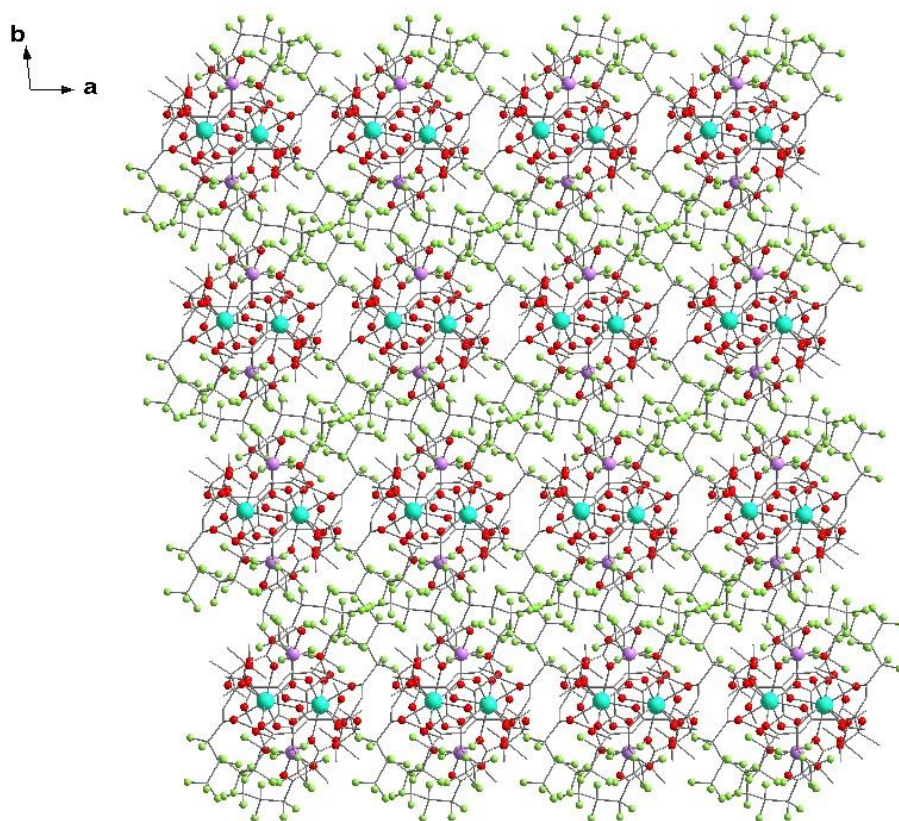**a**

87

88

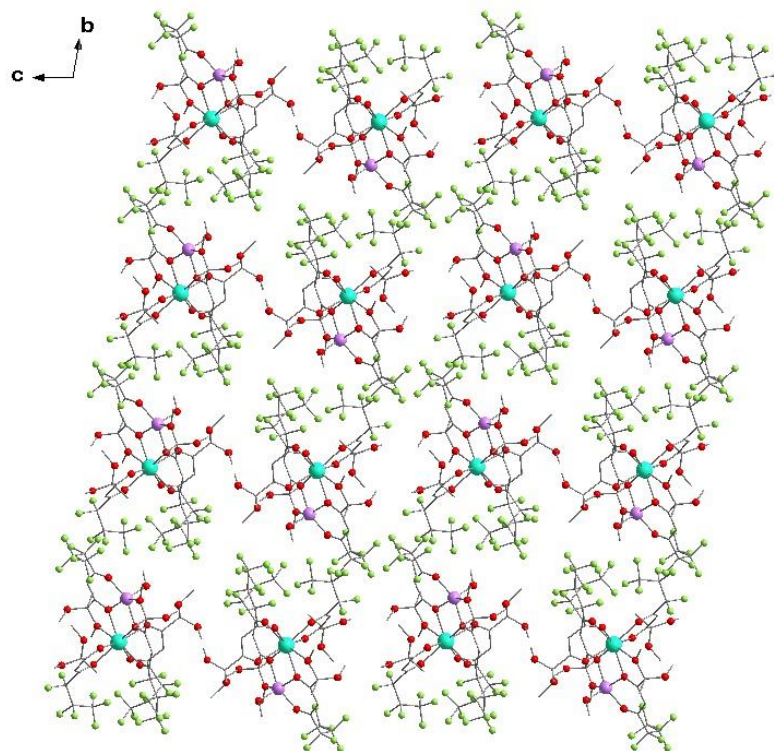**b**

89

90



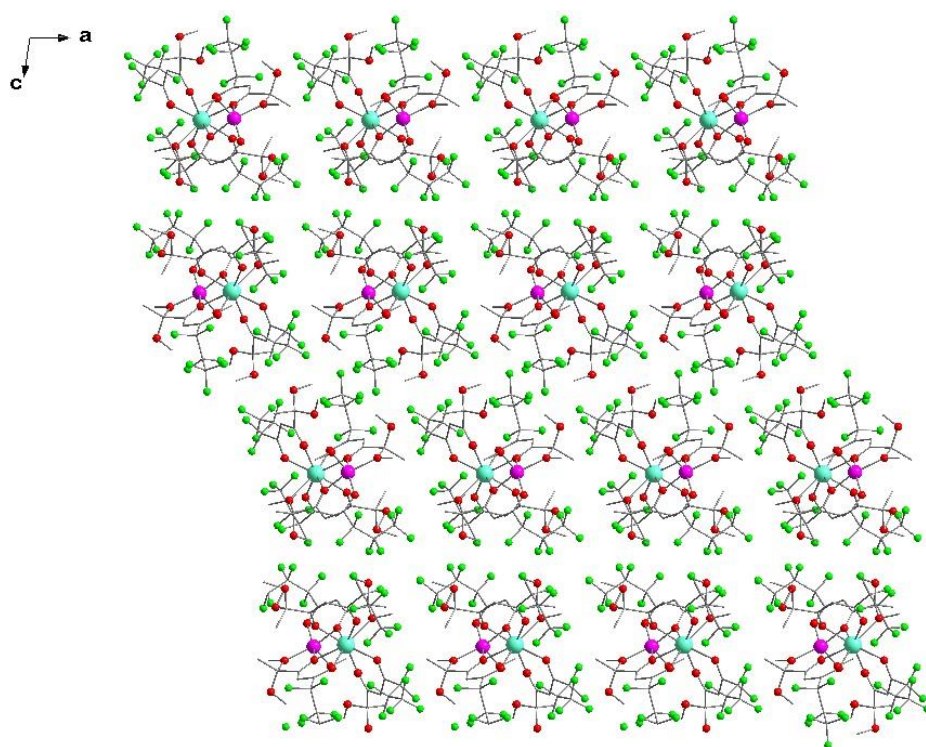**c**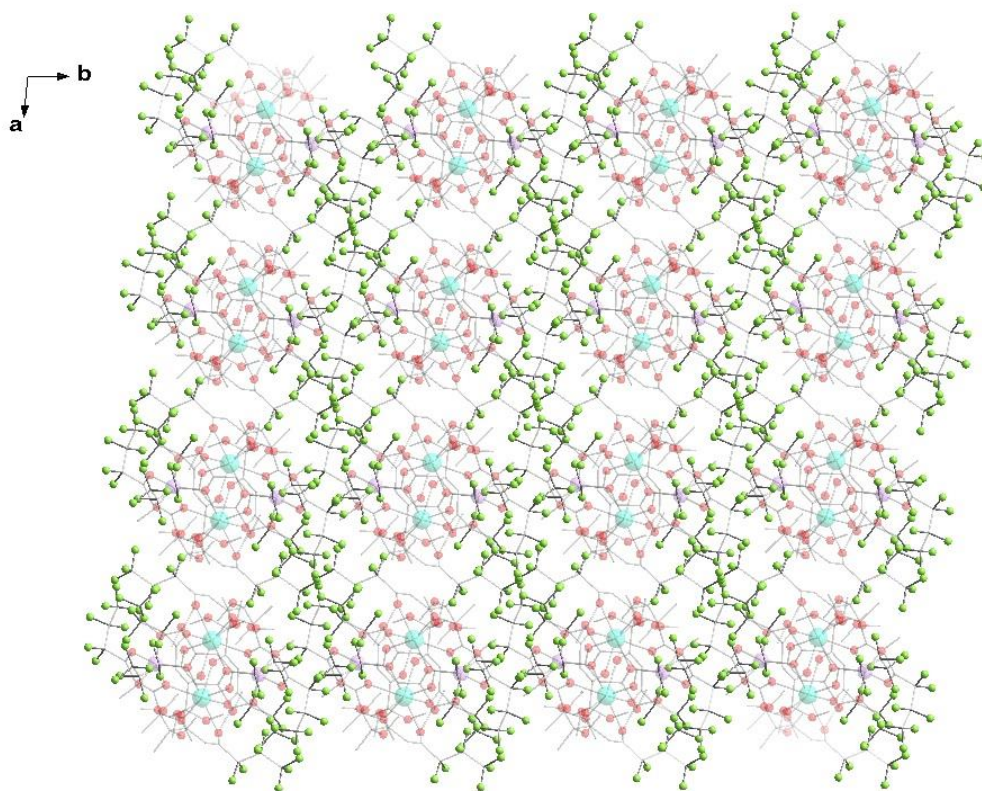**d**

Figure S12. Crystal packing of C<sub>3</sub>F<sub>7</sub>-containing [Ln-Li]  $\beta$ -diketonates **9-11** .

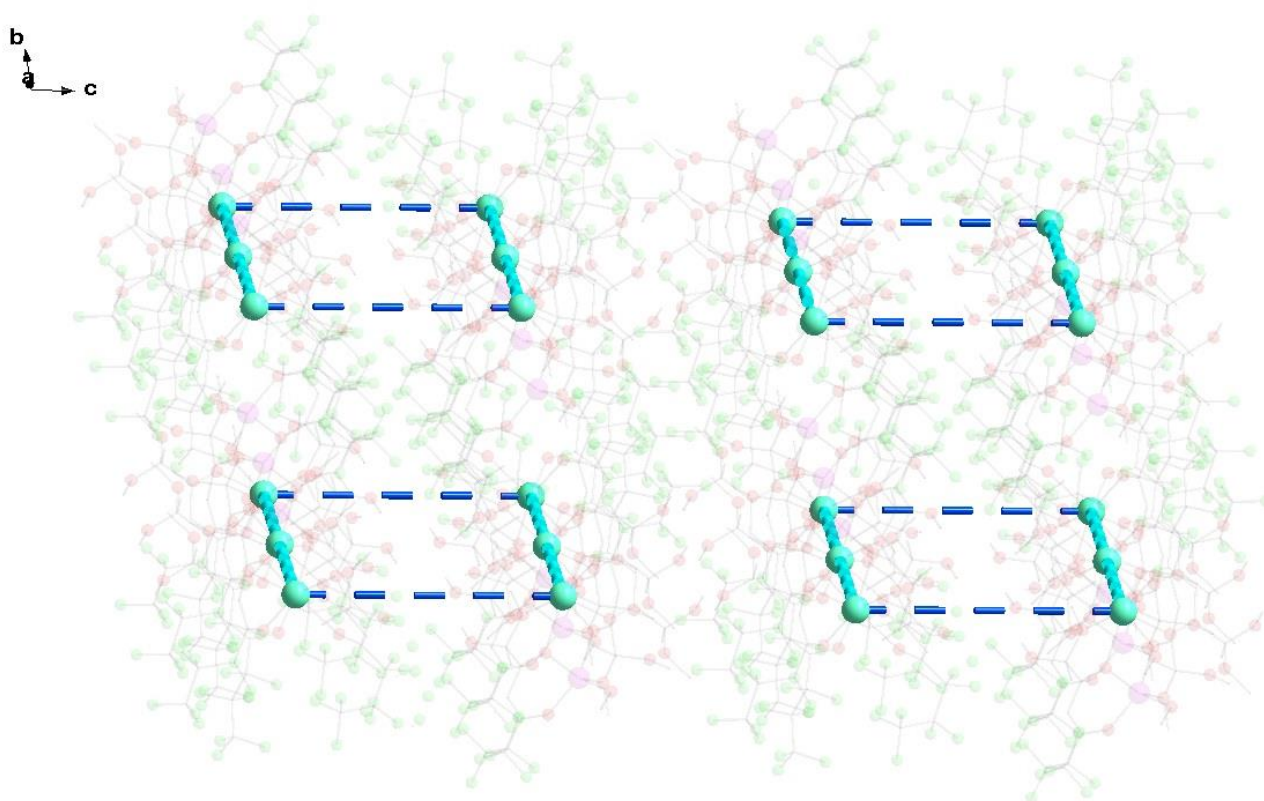

**Figure S13.** Crystal packing of  $C_3F_7$ -containing  $[Ln-Li]$   $\beta$ -diketonates 9-11.  $d(Ln...Ln) \sim 10.6$  Å (turquoise dashed line),  $d(Ln...Ln) \sim 11.0-11.5$  Å (blue dashed line).

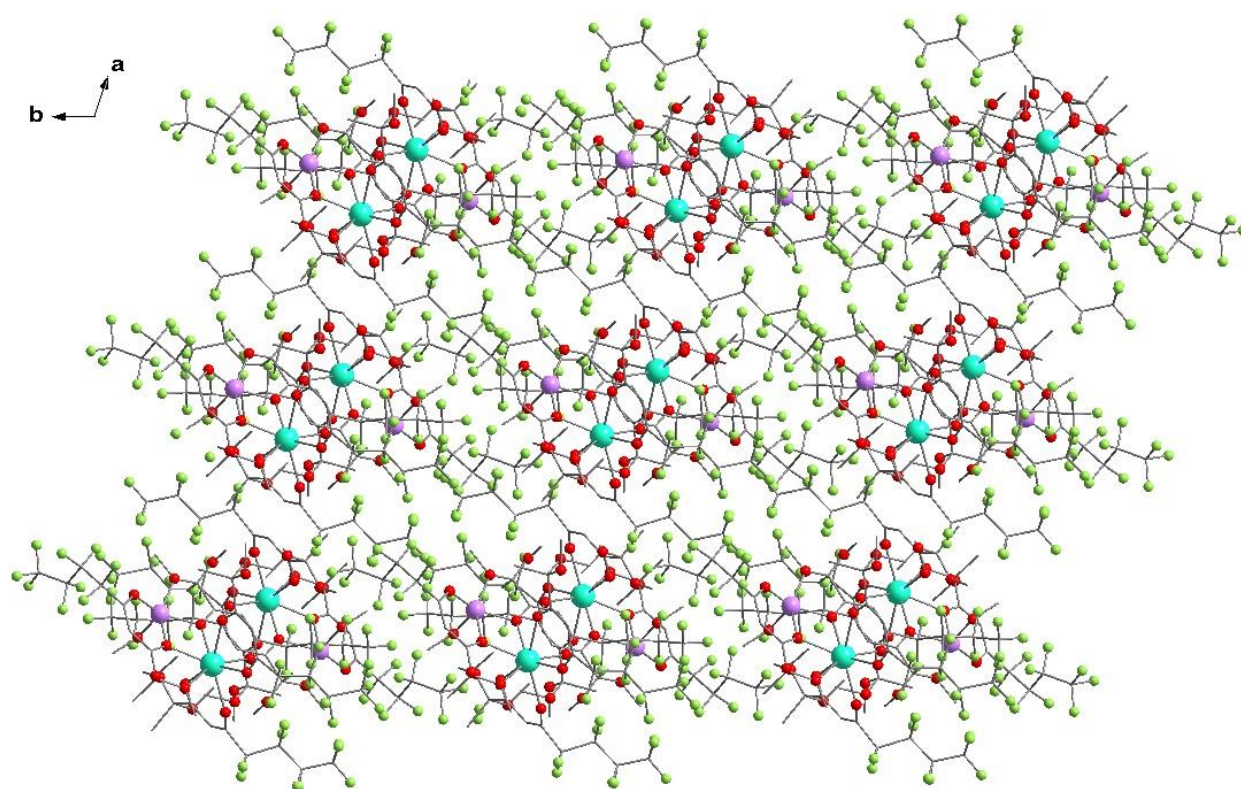

**a**



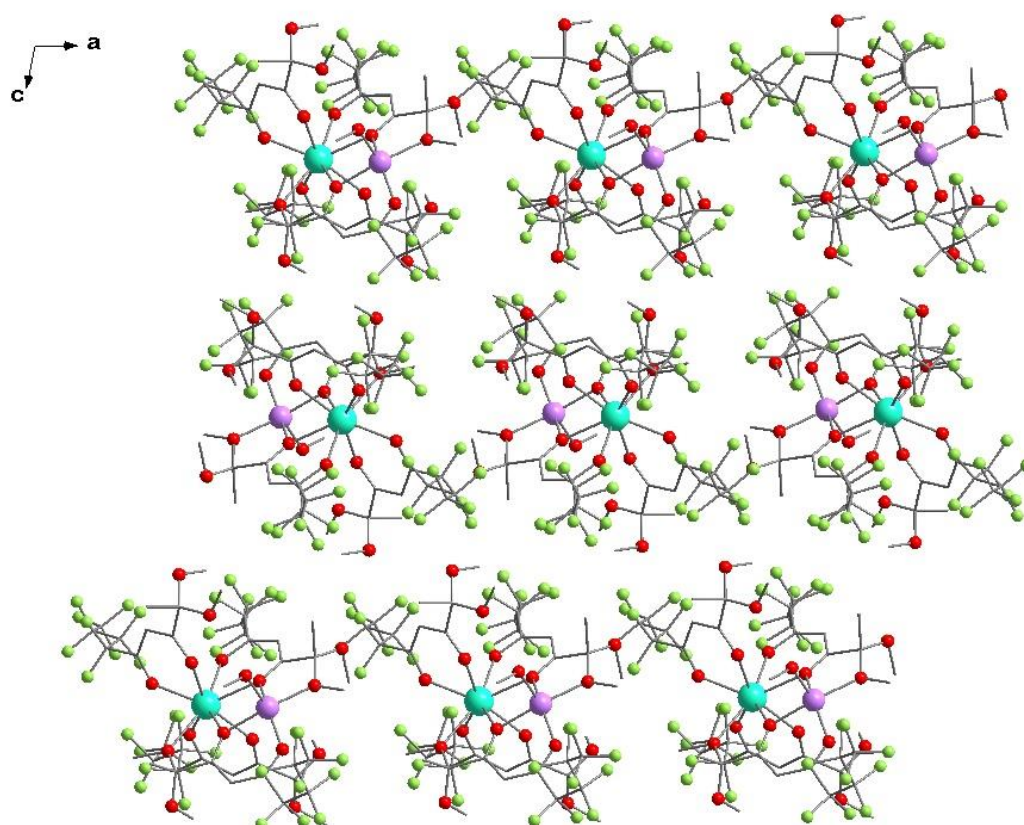**b**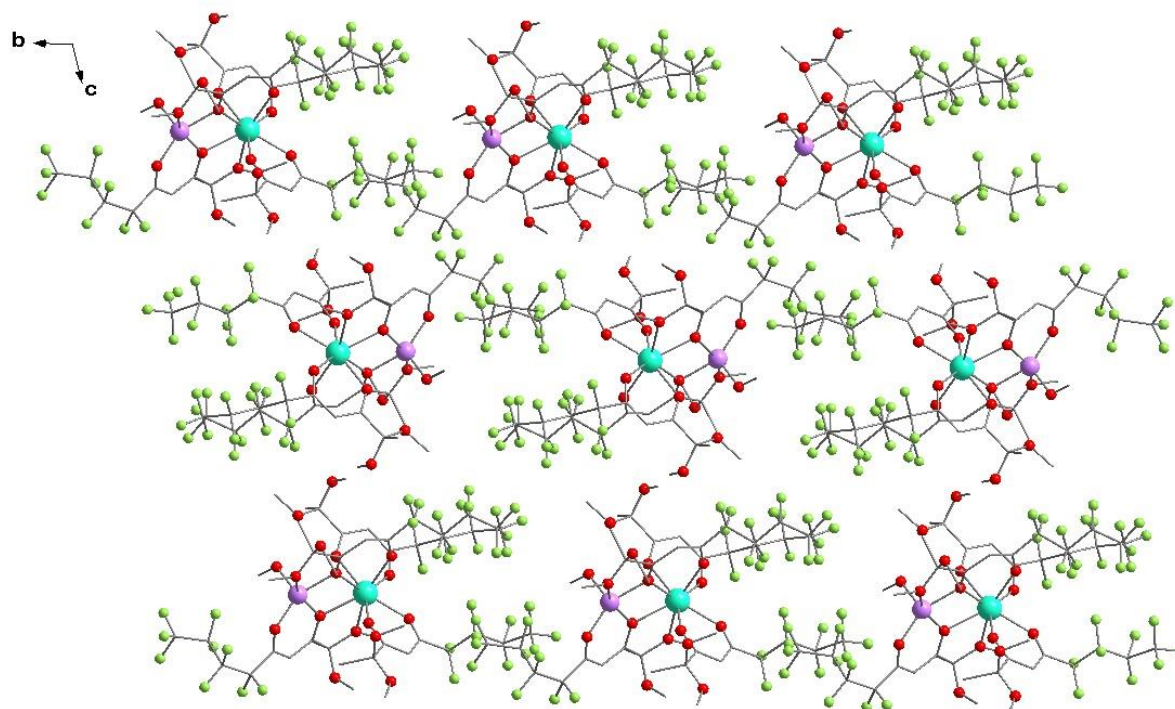**c**

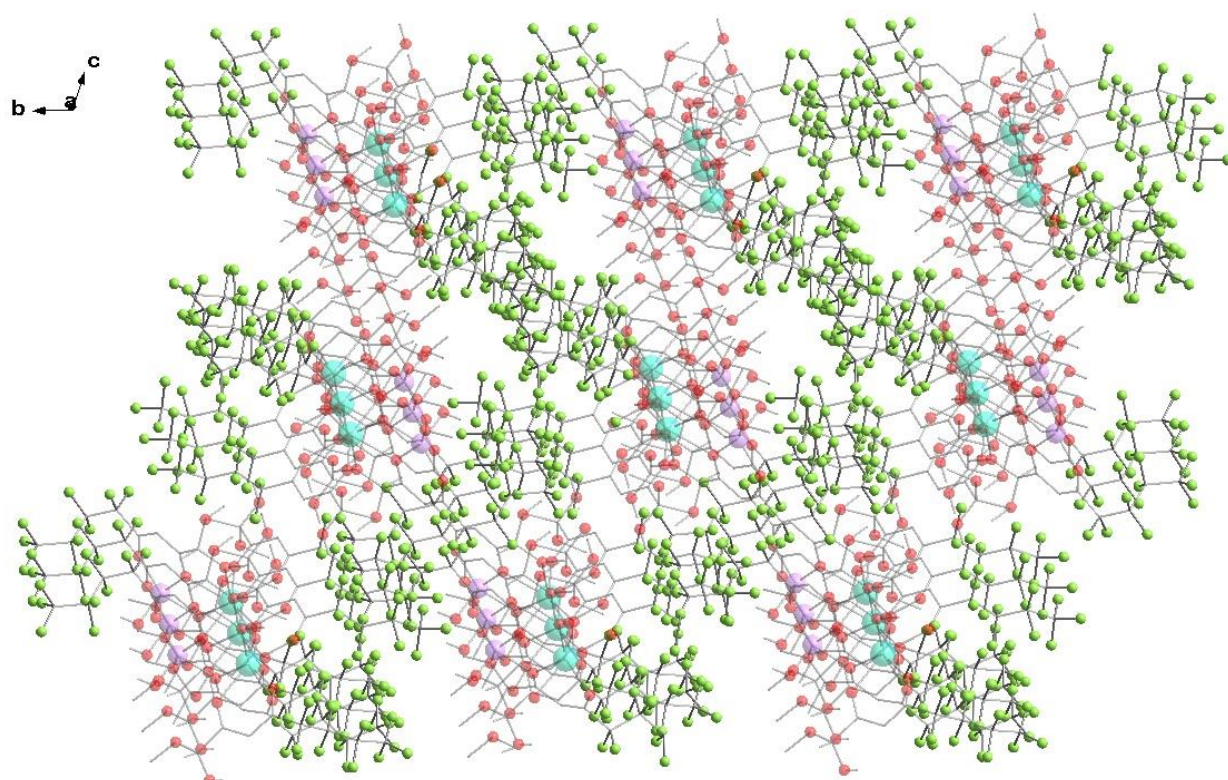**d**

**Figure S14.** Crystal packing of C<sub>4</sub>F<sub>9</sub>-containing [Ln-Li] β-diketonates **12-15**.

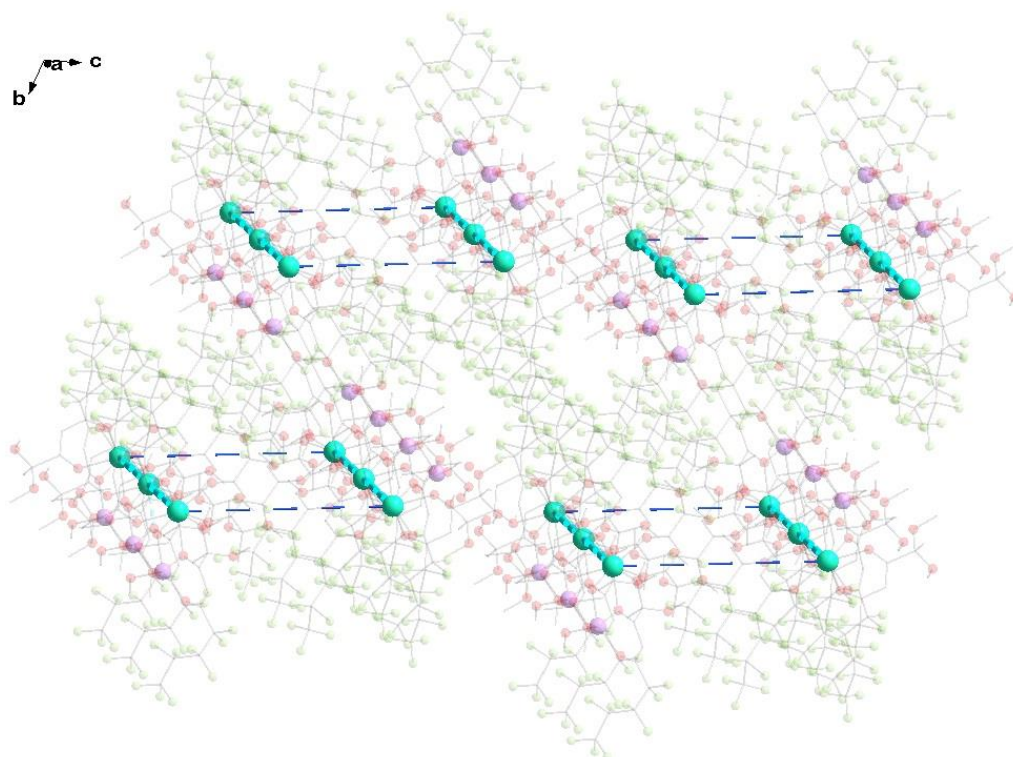

**Figure S15.** Crystal packing of C<sub>4</sub>F<sub>9</sub>-containing [Ln-Li] β-diketonates **12-15**. d(Ln...Ln) ~ 10.7 Å (turquoise dashed line), d(Ln...Ln) ~ 11.1 Å (blue dashed line).



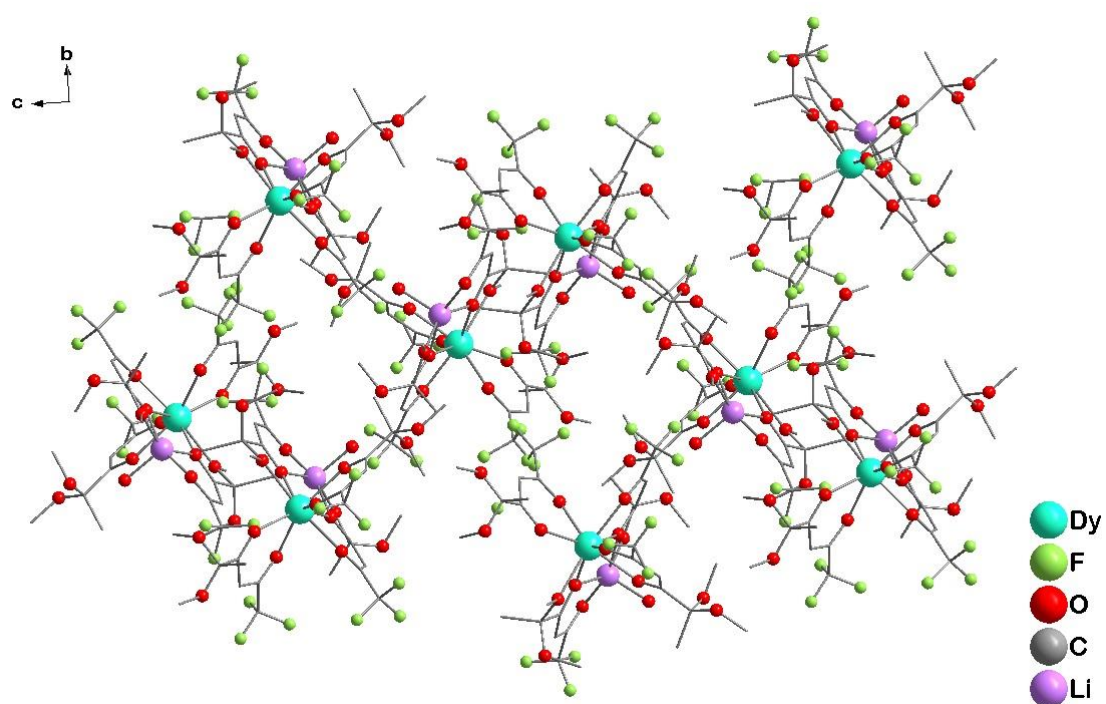**a**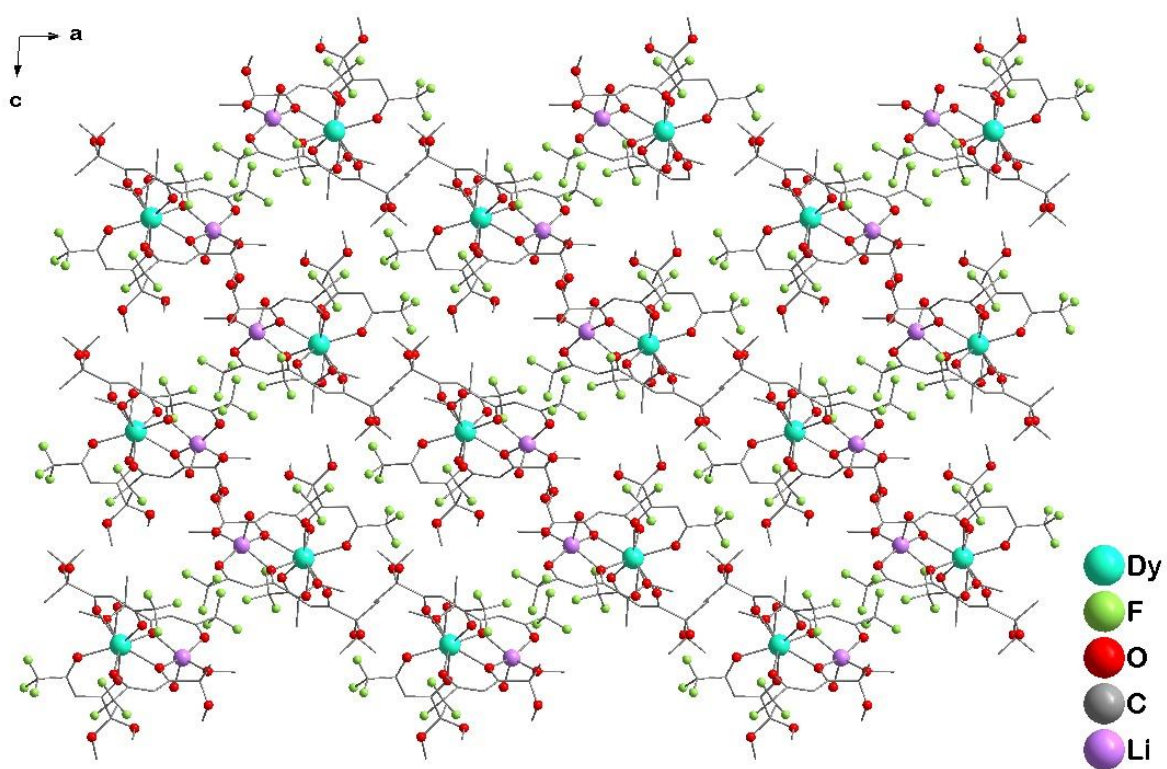**b**

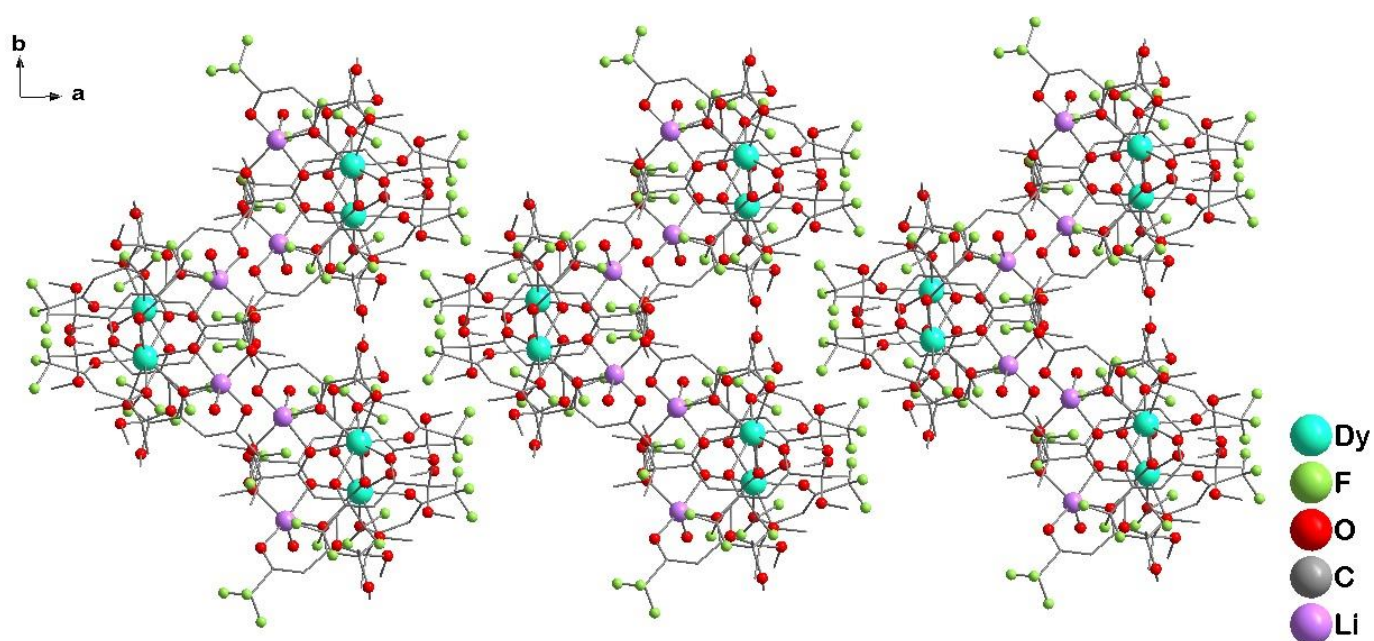**c**

Figure S16. Crystal packing of trifluoromethylated [Dy-Li]  $\beta$ -diketonate **16** along *a* (a), *b* (b) and *c* (c) axis.

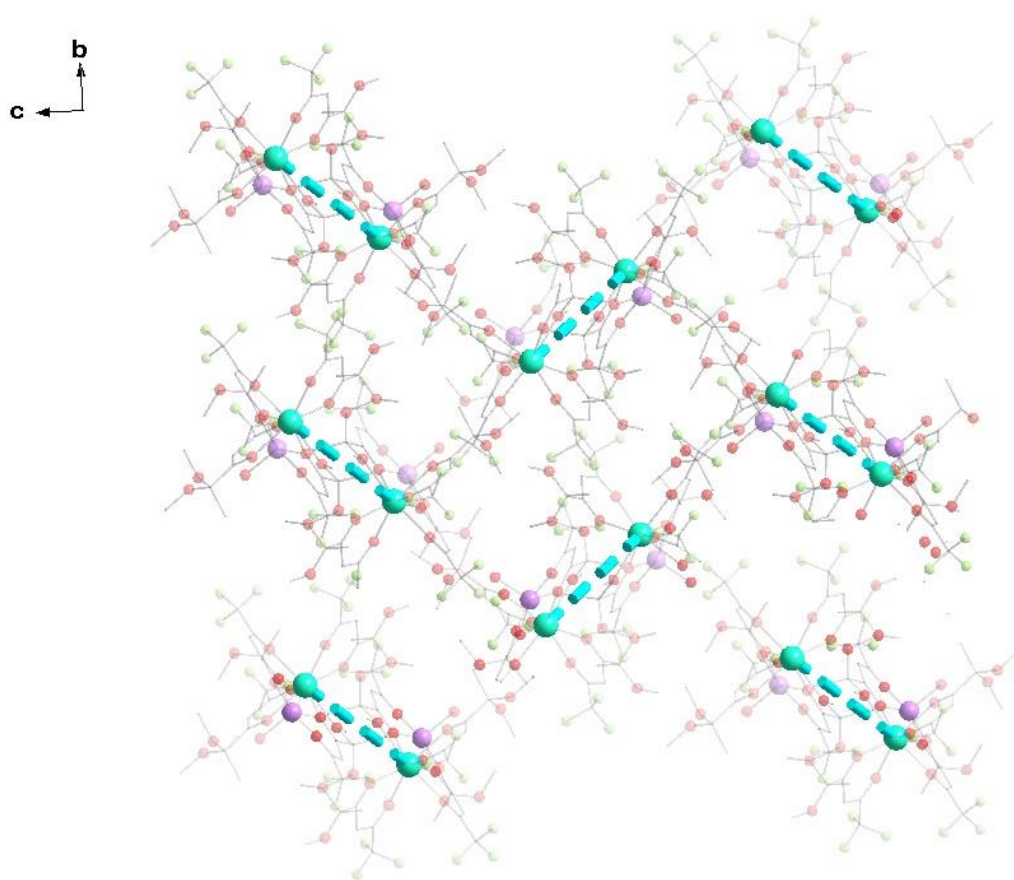**a**



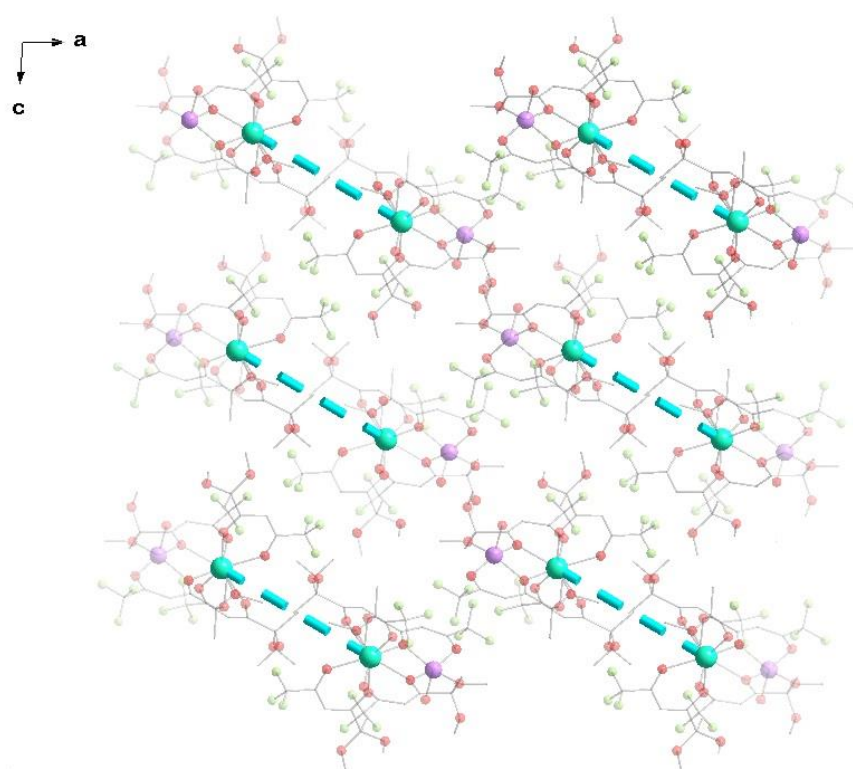**b**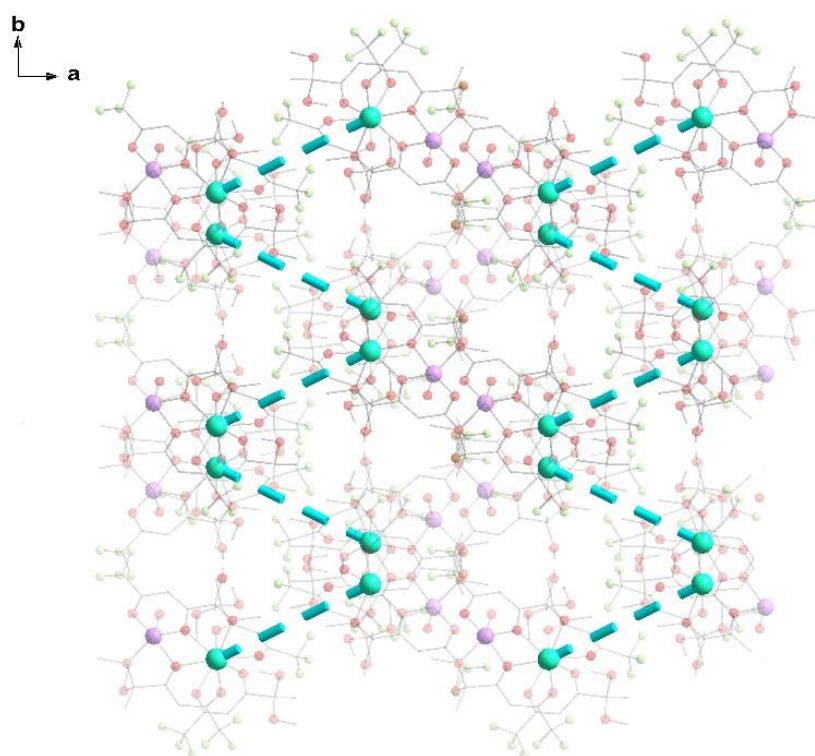**c**

**Figure S17.** Crystal packing of [Dy-Li] CF<sub>3</sub>-β-diketonate **16** with the shortest Ln...Ln distance = 9.633(3)Å along *a* (**a**), *b* (**b**) and *c* (**c**) axis (dashed line).

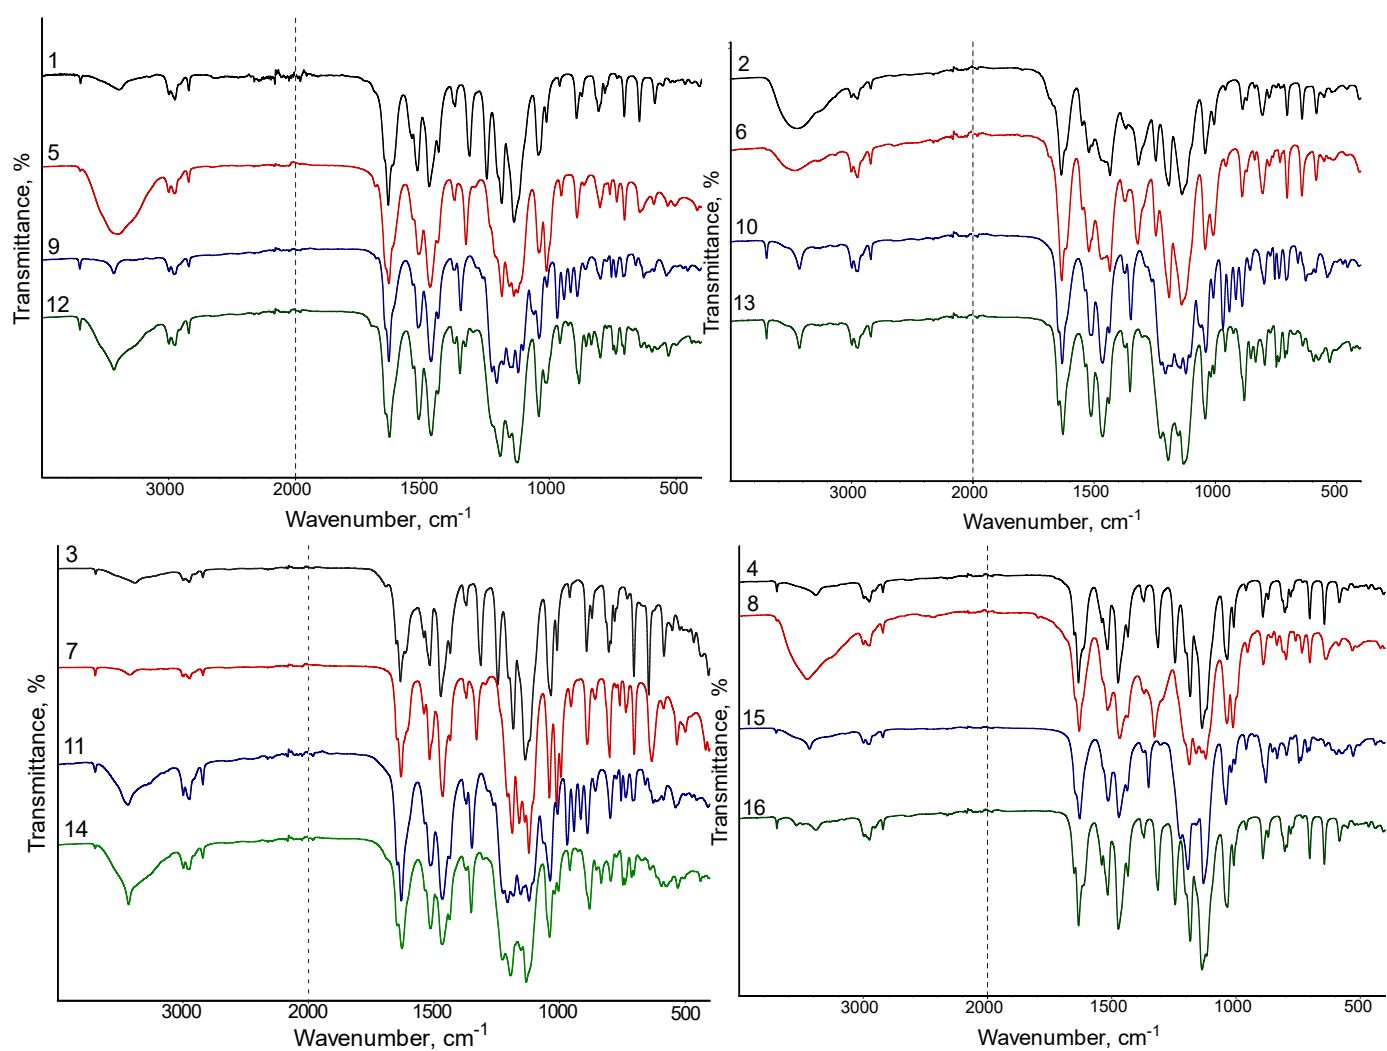

Figure S18. FT-IR spectra of [Ln-Li] R<sup>F</sup>-β-diketonates **1-16**.

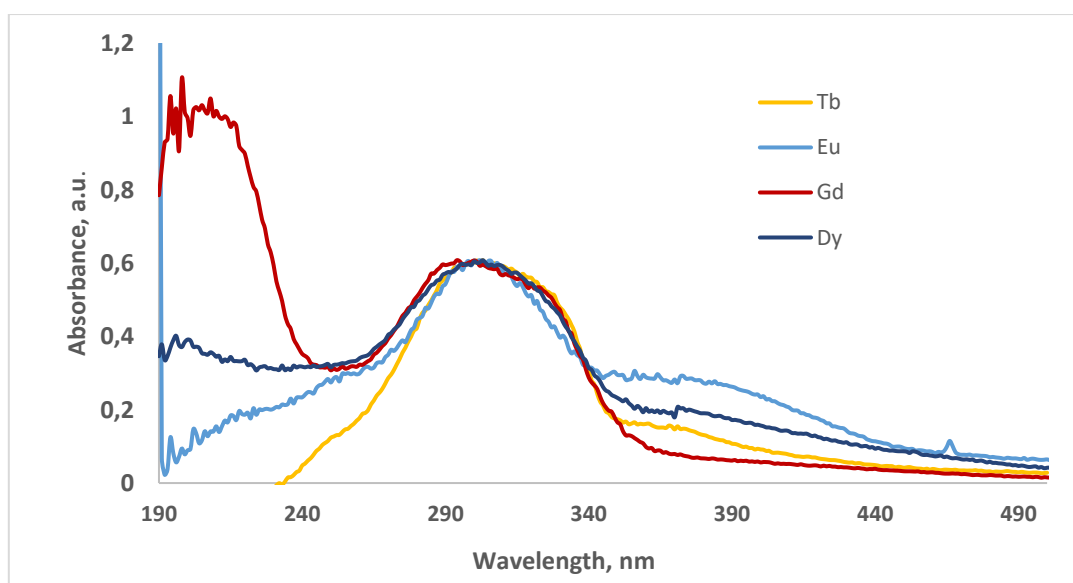

Figure S19 UV-VIS spectra of **1-4** complexes.

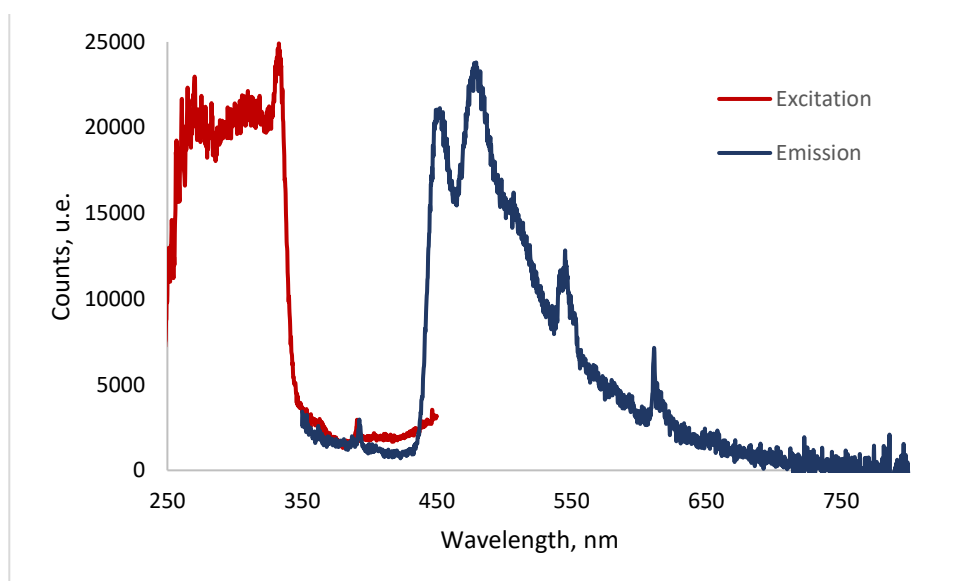

**Figure S20.** PL excitation and phosphorescence spectra for compound **2** at 77 K.

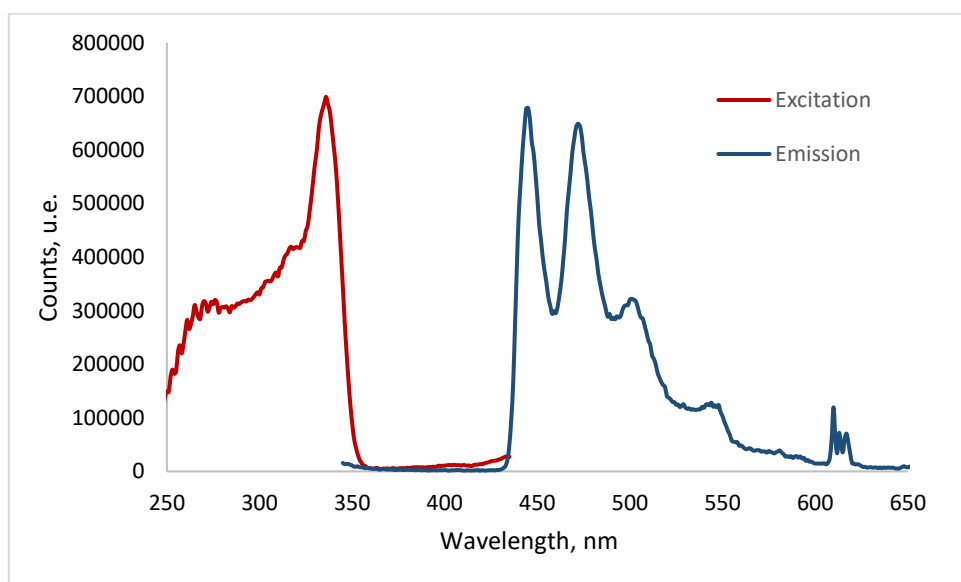

**Figure S21.** PL excitation and phosphorescence spectra for compound **6** at 77 K.

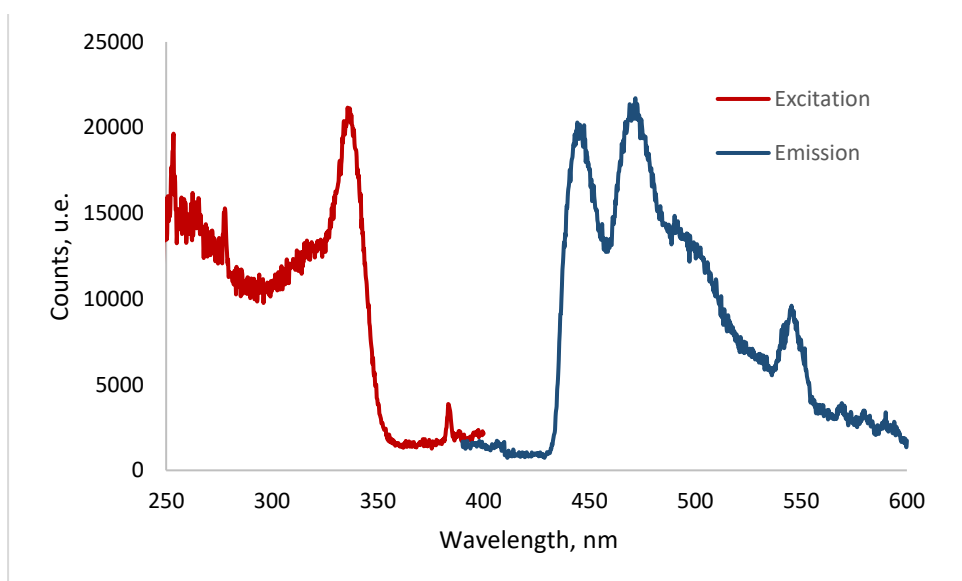

**Figure S22.** PL excitation and phosphorescence spectra for compound **10** at 77 K.

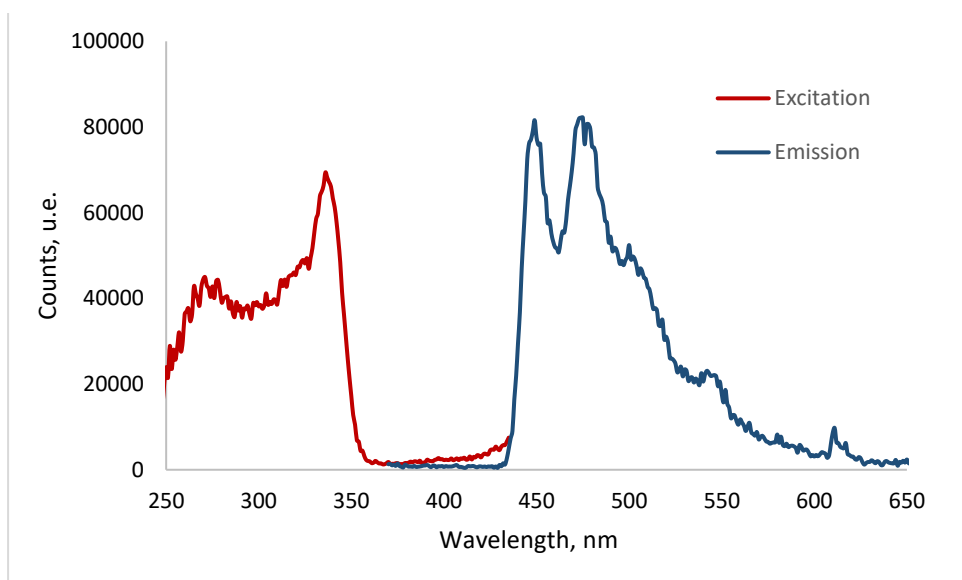

**Figure S23.** PL excitation and phosphorescence spectra for compound **13** at 77 K.

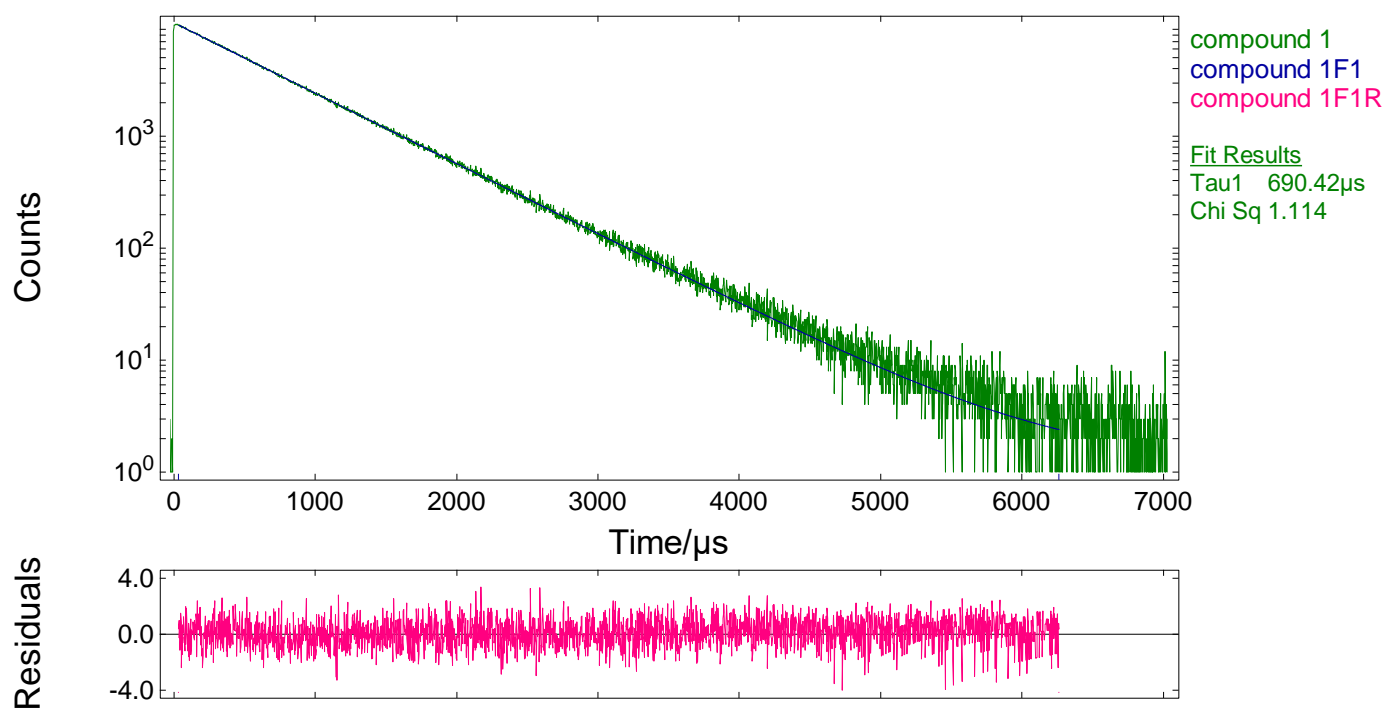

141

Figure S24. Photoluminescence decay for complex 1 in solid state in the visible spectral range at room temperature.

142

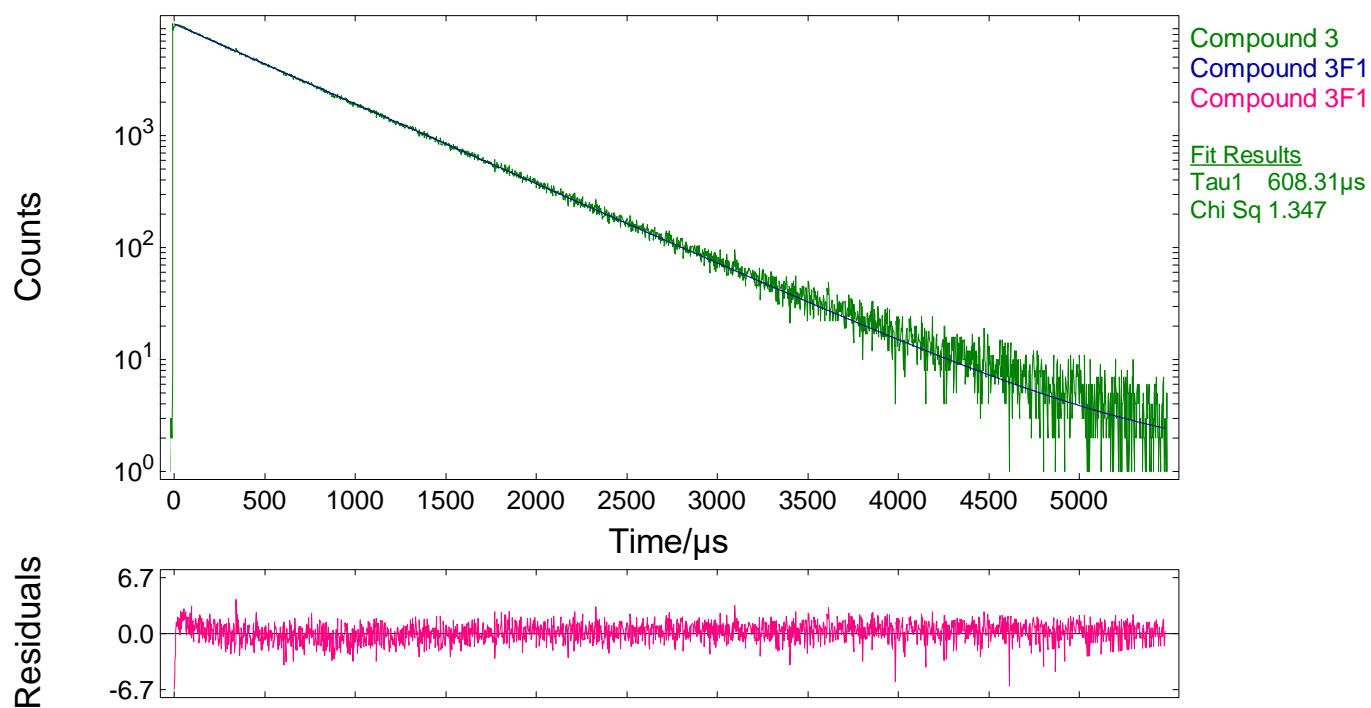

143

Figure S25. Photoluminescence decay for complex 3 in solid state in the visible spectral range at room temperature.

144

145

146

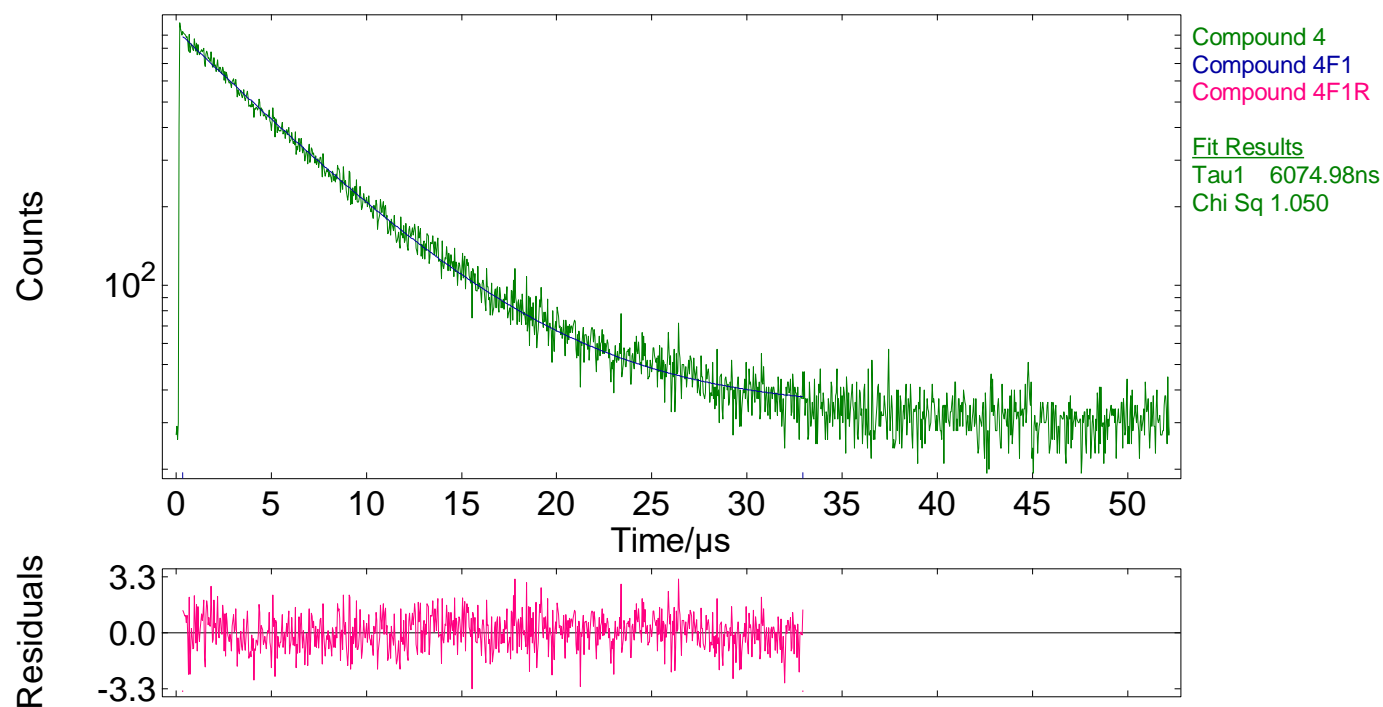

Figure S26. Photoluminescence decay for complex 4 in solid state in the visible spectral range at room temperature.

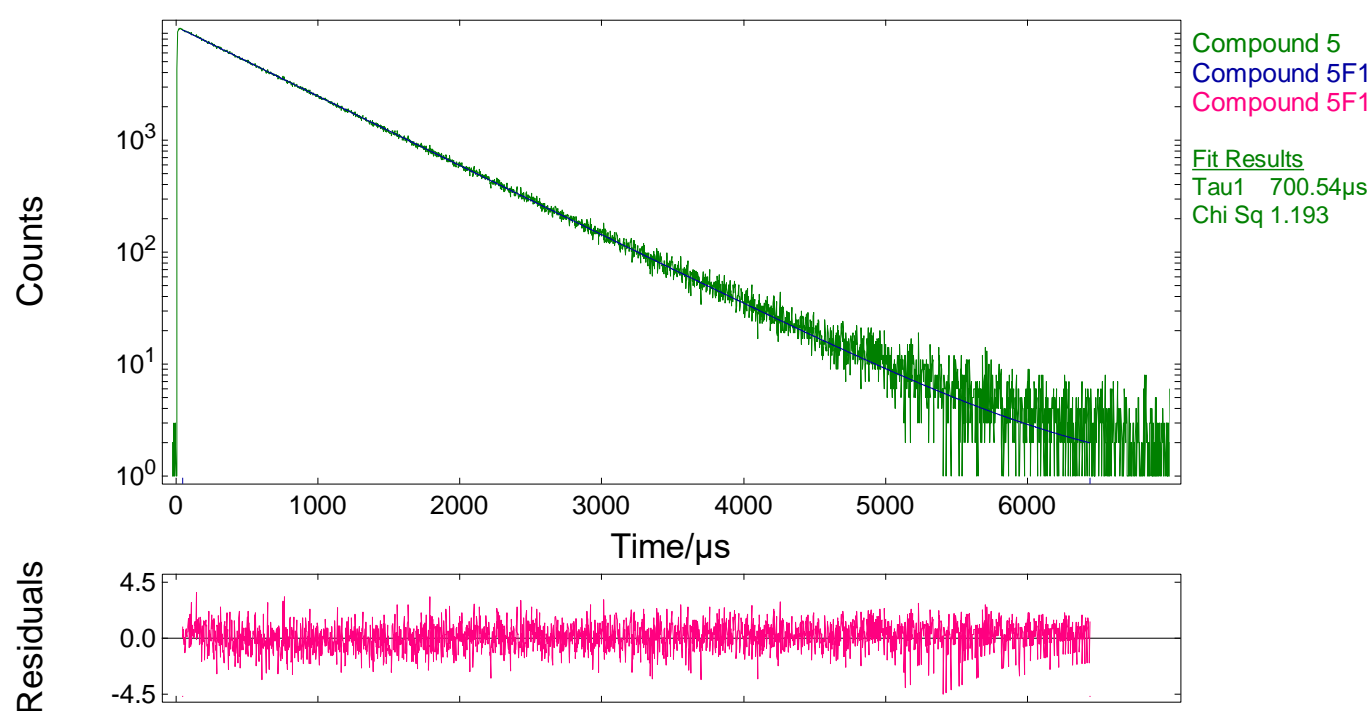

Figure S27. Photoluminescence decay for complex 5 in solid state in the visible spectral range at room temperature.

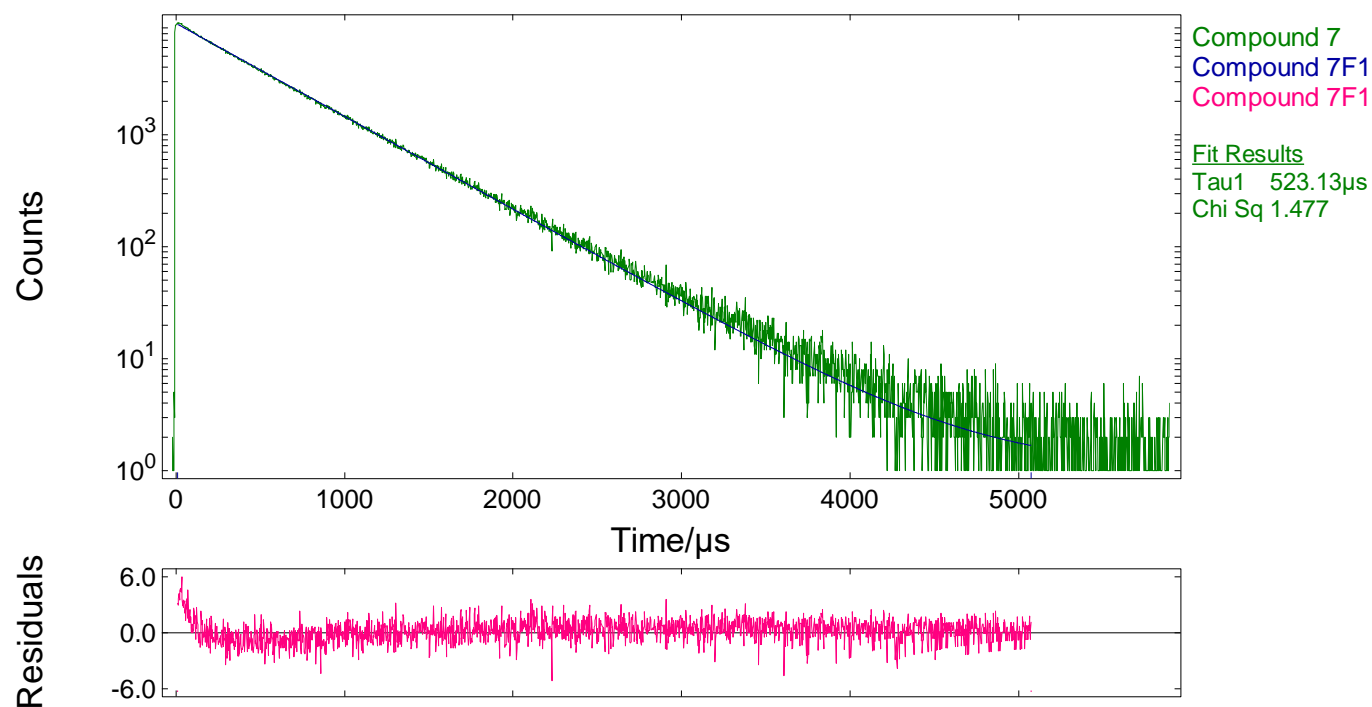

153

154

155

156

Figure S28. Photoluminescence decay for complex 7 in solid state in the visible spectral range at room temperature.

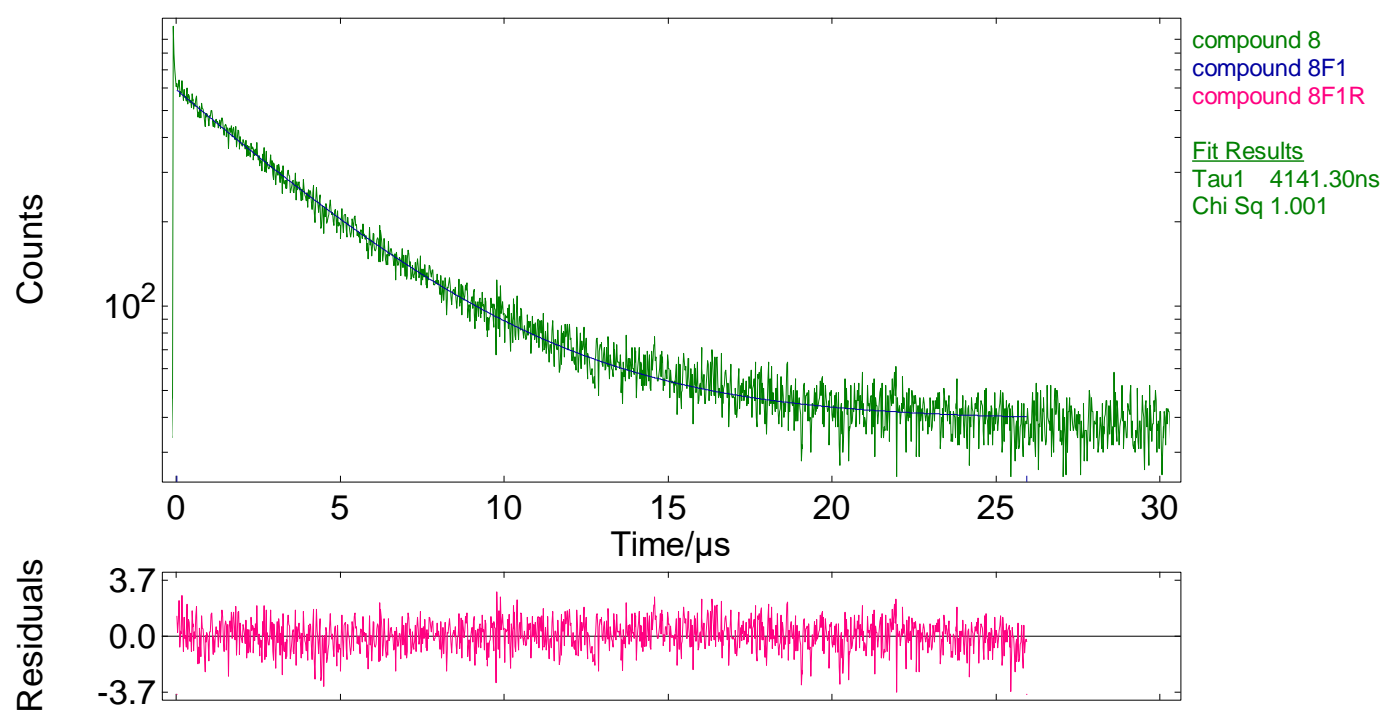

157

158

Figure S29. Photoluminescence decay for complex 8 in solid state in the visible spectral range at room temperature.

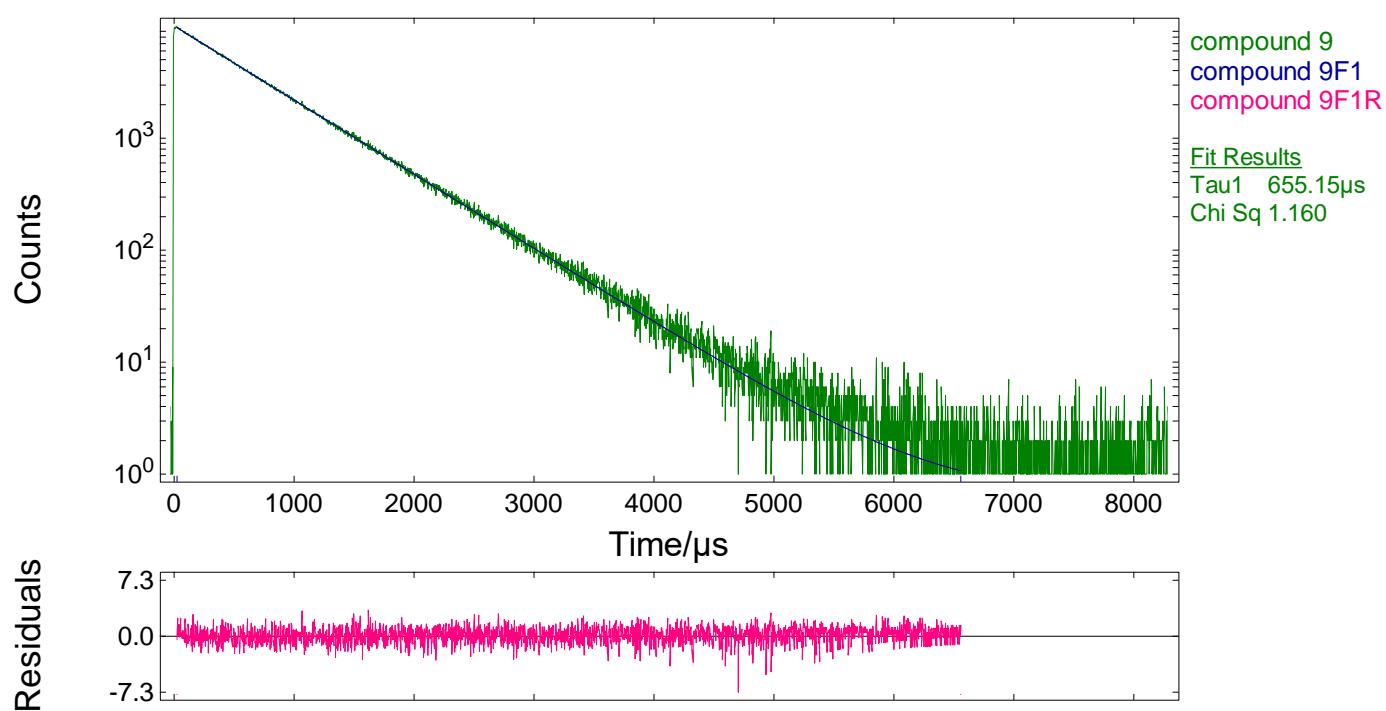

159

Figure S30. Photoluminescence decay for complex 9 in solid state in the visible spectral range at room temperature.

160

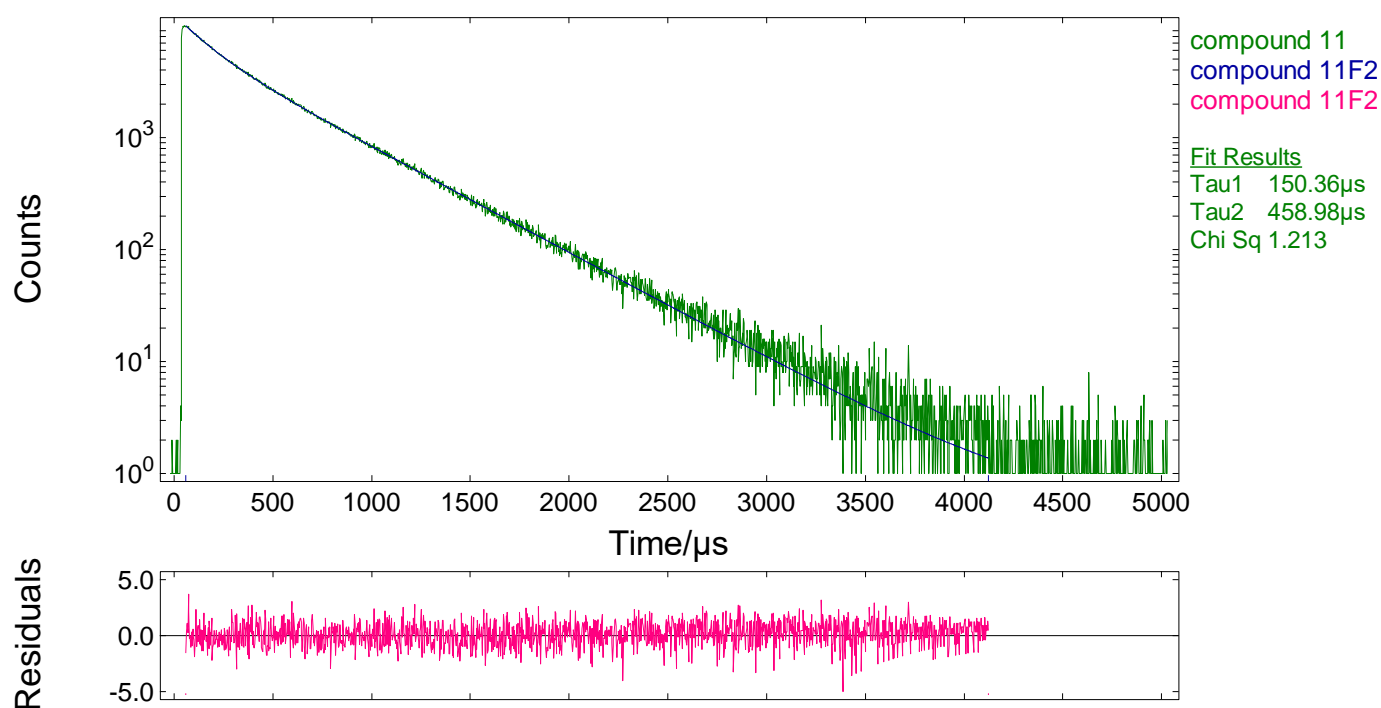

161

Figure S31. Photoluminescence decay for complex 11 in solid state in the visible spectral range at room temperature.

162

163



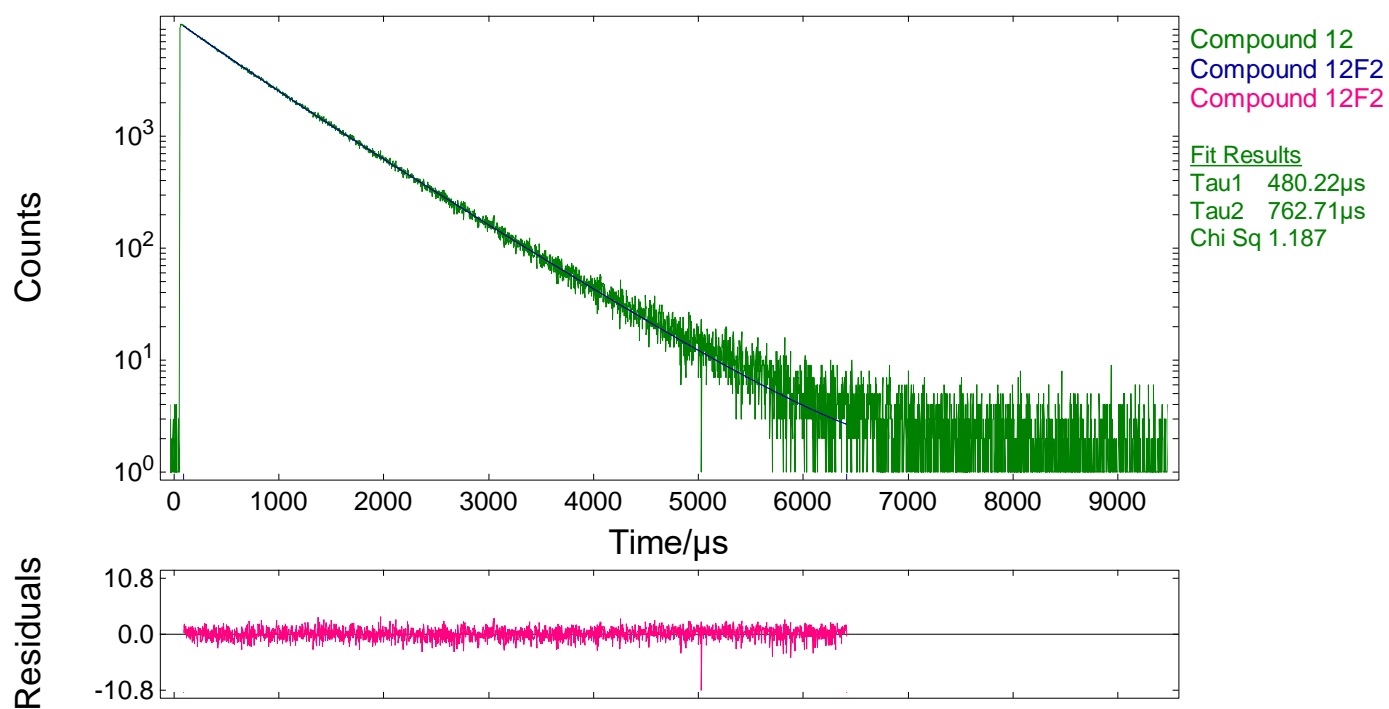

164

Figure S32. Photoluminescence decay for complex 12 in solid state in the visible spectral range at room temperature.

165

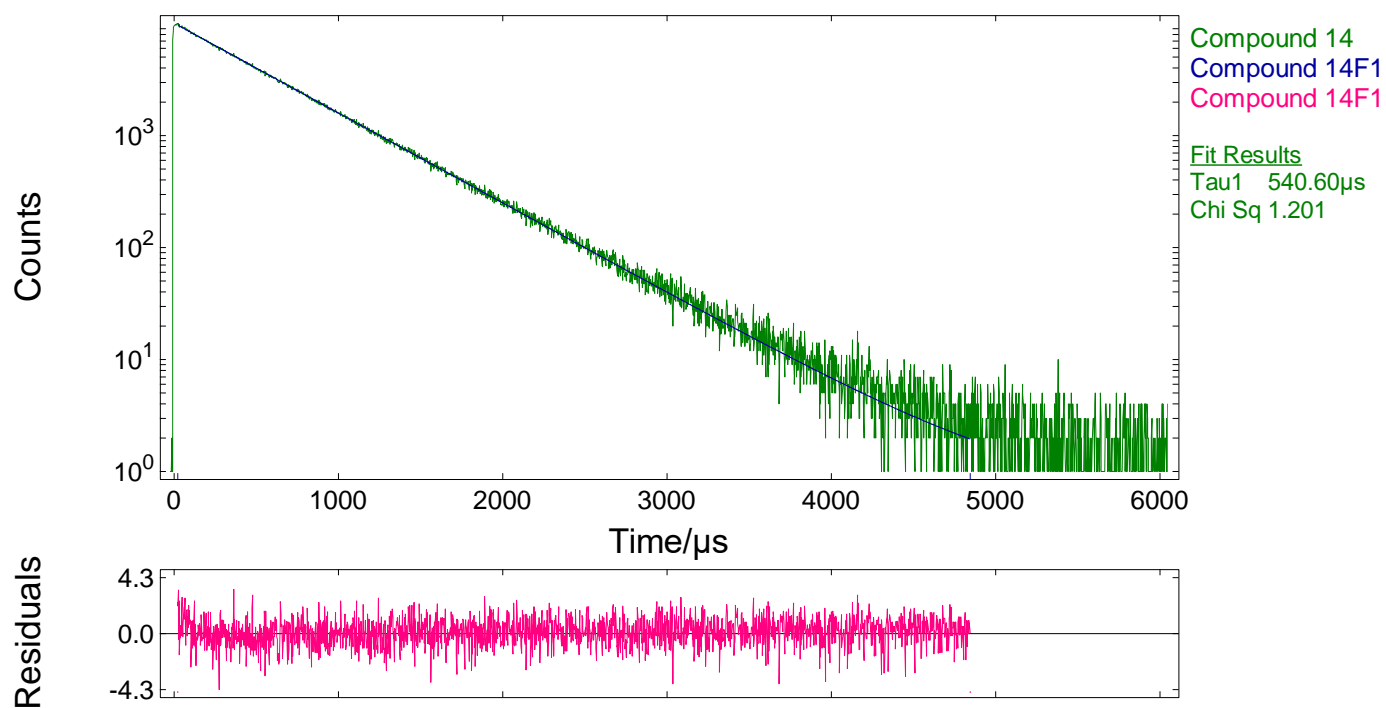

166

Figure S33. Photoluminescence decay for complex 14 in solid state in the visible spectral range at room temperature.

167

168

169

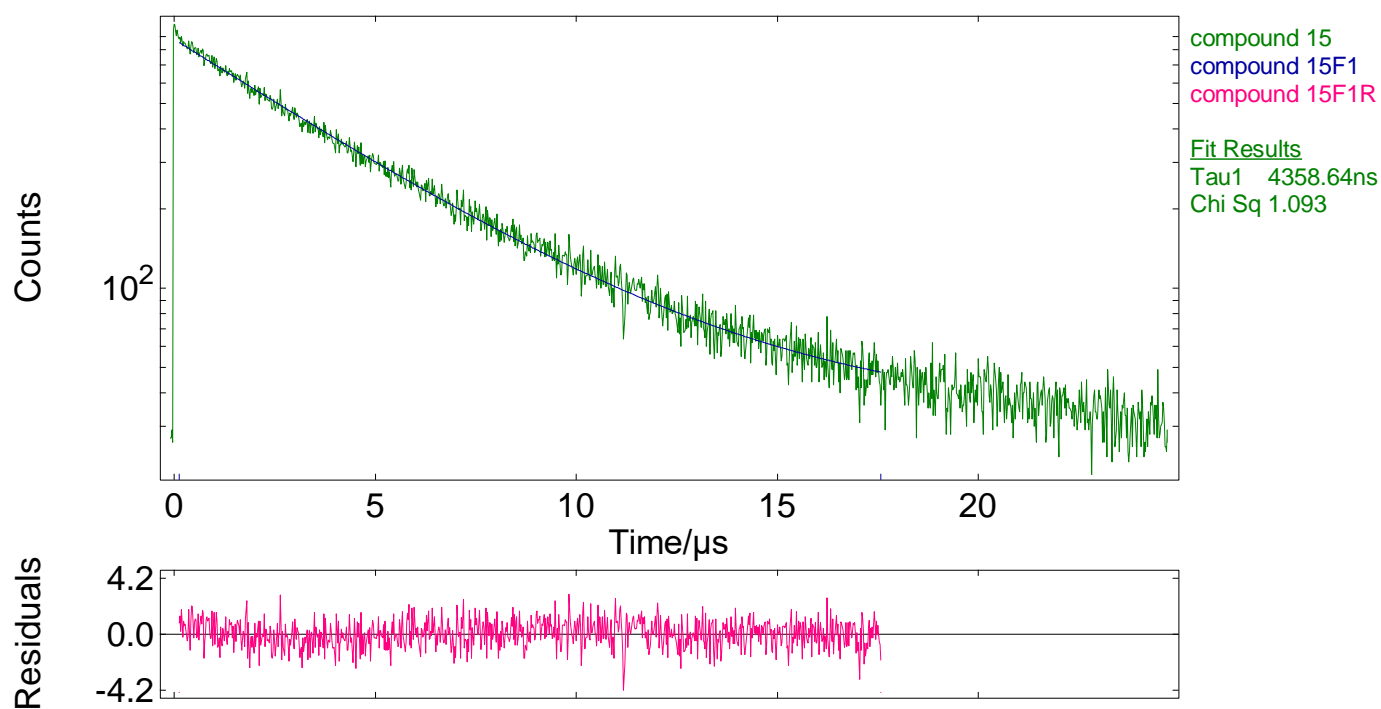

170

Figure S34. Photoluminescence decay for complex 15 in solid state in the visible spectral range at room temperature.

171

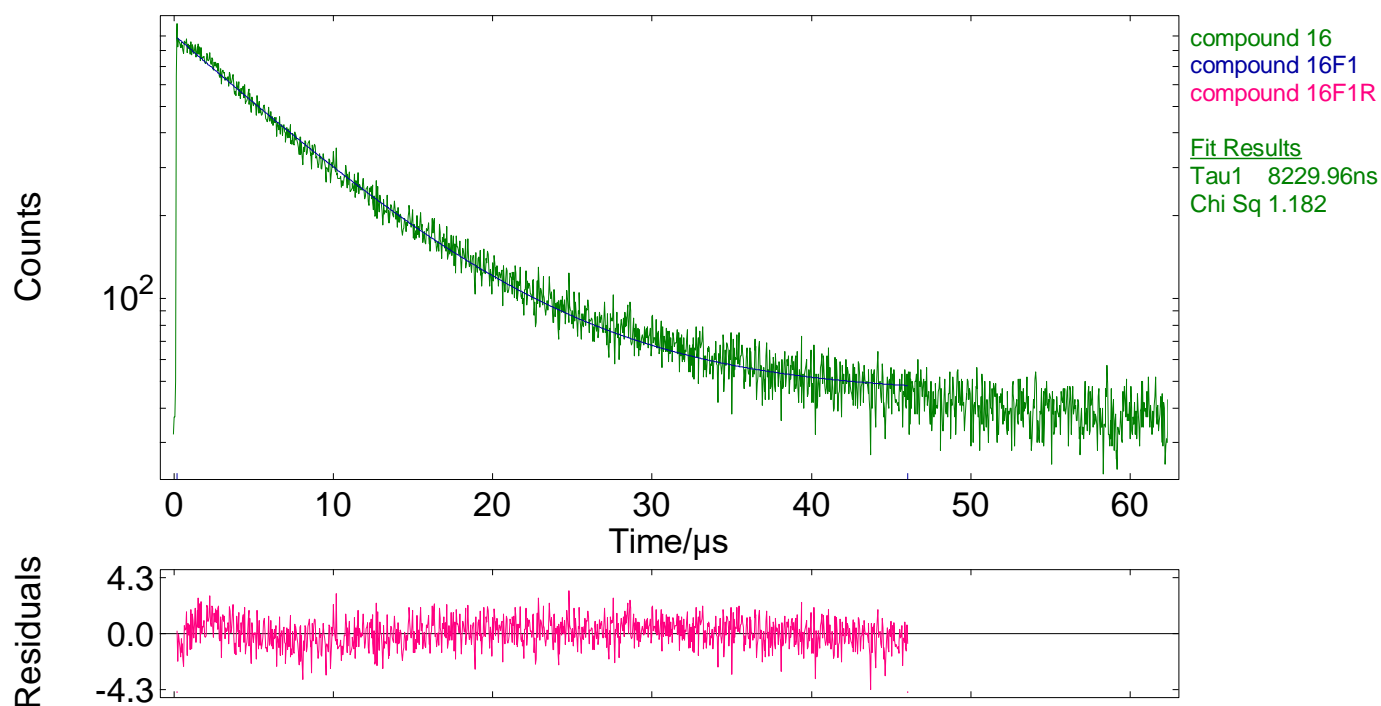

172

Figure S35. Photoluminescence decay for complex 16 in solid state in the visible spectral range at room temperature.

173

174

175

The AC susceptibility data were fitted using the generalized Debye model:

$$\chi'(\omega) = \chi_S + (\chi_T - \chi_S) \frac{1 + (\omega\tau)^{1-\alpha} \sin\left(\frac{\pi\alpha}{2}\right)}{1 + 2(\omega\tau)^{1-\alpha} \sin\left(\frac{\pi\alpha}{2}\right) + (\omega\tau)^{2-2\alpha}}$$

$$\chi''(\omega) = \chi_T - \chi_S \frac{(\omega\tau)^{1-\alpha} \cos\left(\frac{\pi\alpha}{2}\right)}{1 + 2(\omega\tau)^{1-\alpha} \sin\left(\frac{\pi\alpha}{2}\right) + (\omega\tau)^{2-2\alpha}}$$

**Table S15.** Temperature dependence of AC susceptibility parameters for **8** at 1000 Oe DC field

| H, Oe | T, K | $\chi_T$ , cm <sup>3</sup> /mol | $\chi_S$ , cm <sup>3</sup> /mol | $\tau$ , s                | $\alpha$ |
|-------|------|---------------------------------|---------------------------------|---------------------------|----------|
| 1000  | 3    | 4.59(5)                         | 0.136(6)                        | 0.070(2)                  | 0.162(7) |
|       | 3.5  | 3.81(2)                         | 0.124(5)                        | 0.0249(3)                 | 0.122(5) |
|       | 4    | 3.30(1)                         | 0.110(5)                        | 0.01038(9)                | 0.106(4) |
|       | 4.5  | 2.940(8)                        | 0.096(4)                        | 0.00506(3)                | 0.094(3) |
|       | 5    | 2.81(5)                         | 0.07(3)                         | 0.003(1)                  | 0.12(2)  |
|       | 6    | 2.231(6)                        | 0.076(6)                        | 996(6) · 10 <sup>-6</sup> | 0.086(4) |
|       | 7    | 1.918(5)                        | 0.081(9)                        | 444(3) · 10 <sup>-6</sup> | 0.078(5) |
|       | 8    | 1.674(3)                        | 0.13(1)                         | 237(3) · 10 <sup>-6</sup> | 0.053(5) |
|       | 9    | 1.488(1)                        | 0.16(1)                         | 137(2) · 10 <sup>-6</sup> | 0.039(4) |
|       | 10   | 1.31(1)                         | 0.19(8)                         | 84(7) · 10 <sup>-6</sup>  | 0        |

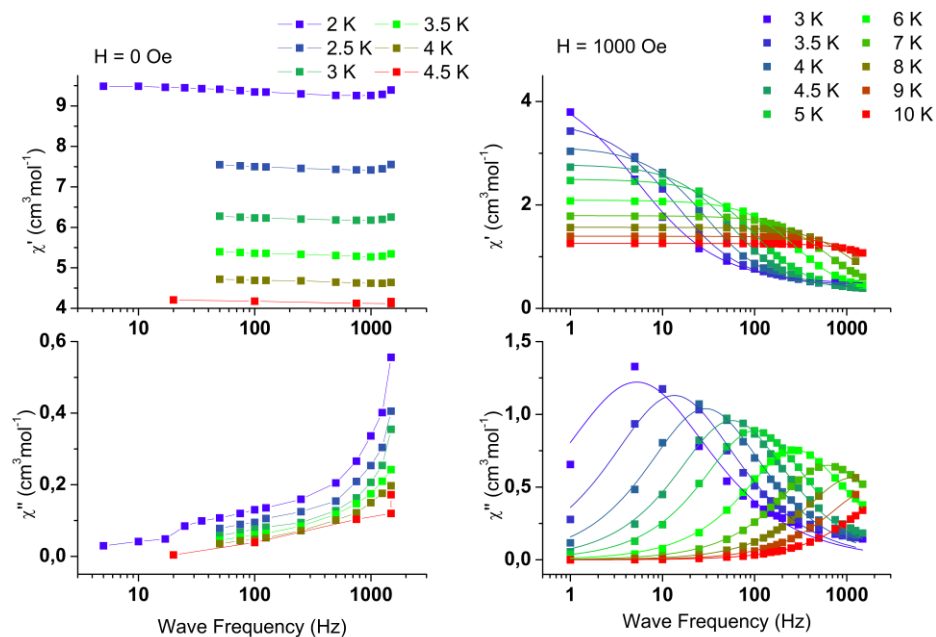

**Figure S36** Frequency dependence of the in-phase ( $\chi'$ ) and out-of-phase ( $\chi''$ ) AC magnetic susceptibility for compound **15** under zero (left, points are connected for clarity) and 1000 Oe (right) DC field, solid lines are fits to the Debye model.

**Table S16.** Temperature dependence of AC susceptibility parameters for **15** at 750 and 1000 Oe DC field

| H, Oe | T, K | $\chi_T$ , cm <sup>3</sup> /mol | $\chi_S$ , cm <sup>3</sup> /mol | $\tau$ , s                | $\alpha$ |
|-------|------|---------------------------------|---------------------------------|---------------------------|----------|
| 1000  | 3    | 4.5(1)                          | 0.45(2)                         | 0.030(2)                  | 0.30(2)  |
|       | 3.5  | 3.64(4)                         | 0.43(2)                         | 0.0118(4)                 | 0.22(1)  |
|       | 4    | 3.14(2)                         | 0.39(1)                         | 0.0054(1)                 | 0.175(9) |
|       | 4.5  | 2.78(1)                         | 0.352(8)                        | 0.00279(3)                | 0.152(6) |
|       | 5    | 2.500(7)                        | 0.35(1)                         | 0.00157(1)                | 0.121(5) |
|       | 6    | 2.094(4)                        | 0.290(7)                        | 569(4) · 10 <sup>-4</sup> | 0.113(4) |
|       | 7    | 1.794(3)                        | 0.280(8)                        | 254(2) · 10 <sup>-4</sup> | 0.097(4) |
|       | 8    | 1.588(1)                        | 0.30(1)                         | 136(2) · 10 <sup>-4</sup> | 0.072(4) |
|       | 9    | 1.3595(6)                       | 0.31(1)                         | 79(4) · 10 <sup>-6</sup>  | 0.059(3) |
|       | 10   | 1.2562(4)                       | 0.29(1)                         | 47(1) · 10 <sup>-6</sup>  | 0.055(4) |

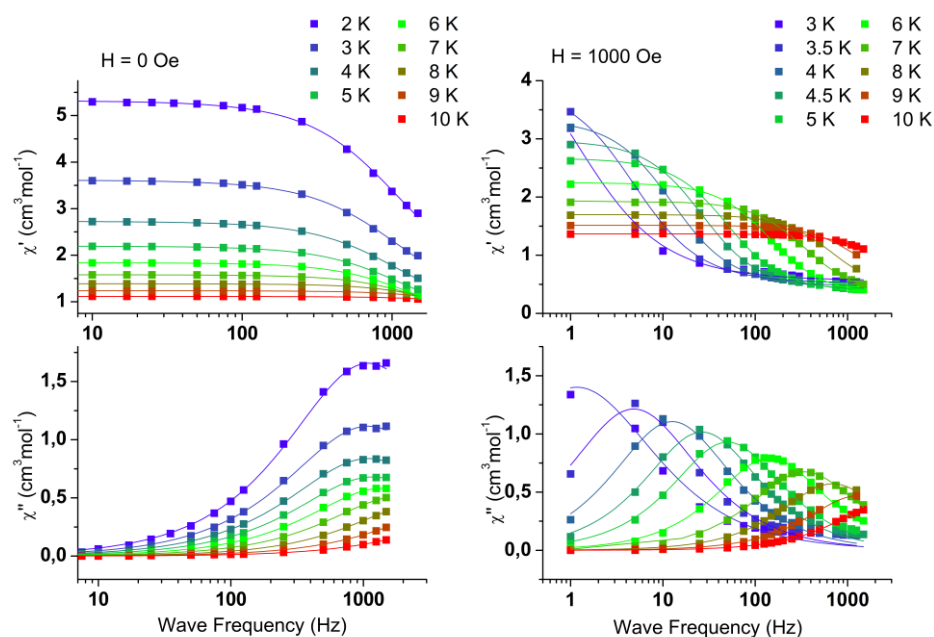

**Figure S37** Frequency dependence of the in-phase ( $\chi'$ ) and out-of-phase ( $\chi''$ ) AC magnetic susceptibility for compound **16** under zero (left, points are connected for clarity) and 1000 Oe (right) DC field, solid lines are fits to the Debye model.

**Table S17.** Temperature dependence of AC susceptibility parameters for **16** at zero and 1000 Oe DC field

| H, Oe | T, K | $\chi_T$ , cm <sup>3</sup> /mol | $\chi_S$ , cm <sup>3</sup> /mol | $\tau$ , s             | $\alpha$ |
|-------|------|---------------------------------|---------------------------------|------------------------|----------|
| 0     | 2    | 5.323(9)                        | 1.21(6)                         | $146(3) \cdot 10^{-6}$ | 0.135(9) |
|       | 3    | 3.616(6)                        | 0.86(4)                         | $146(3) \cdot 10^{-6}$ | 0.134(9) |
|       | 4    | 2.729(3)                        | 0.69(2)                         | $145(2) \cdot 10^{-6}$ | 0.123(5) |
|       | 5    | 2.196(2)                        | 0.58(2)                         | $135(2) \cdot 10^{-6}$ | 0.107(1) |
|       | 6    | 1.838(1)                        | 0.50(1)                         | $114(1) \cdot 10^{-6}$ | 0.086(4) |
|       | 7    | 1.5801(6)                       | 0.42(1)                         | $83(1) \cdot 10^{-6}$  | 0.076(3) |
|       | 8    | 1.3869(4)                       | 0.39(1)                         | $56(1) \cdot 10^{-6}$  | 0.064(4) |
|       | 9    | 1.2369(4)                       | 0.32(3)                         | $31(1) \cdot 10^{-6}$  | 0.078(6) |
|       | 10   | 1.1153(6)                       | 0.46(7)                         | $22(3) \cdot 10^{-6}$  | 0.083(1) |
| 1000  | 3    | 5.3(3)                          | 0.56(2)                         | 0.13(2)                | 0.32(3)  |
|       | 3.5  | 3.92(7)                         | 0.51(1)                         | 0.033(2)               | 0.21(2)  |
|       | 4    | 3.35(3)                         | 0.46(1)                         | 0.0126(3)              | 0.17(1)  |
|       | 4.5  | 2.98(2)                         | 0.41(1)                         | $610(1) \cdot 10^{-5}$ | 0.148(7) |
|       | 5    | 2.67(1)                         | 0.377(7)                        | $318(3) \cdot 10^{-5}$ | 0.133(6) |
|       | 6    | 2.249(7)                        | 0.326(7)                        | $110(1) \cdot 10^{-5}$ | 0.121(5) |
|       | 7    | 1.934(5)                        | 0.320(9)                        | $46(1) \cdot 10^{-5}$  | 0.114(6) |
|       | 8    | 1.698(3)                        | 0.37(1)                         | $23(1) \cdot 10^{-5}$  | 0.094(6) |
|       | 9    | 1.515(1)                        | 0.45(2)                         | $12(1) \cdot 10^{-5}$  | 0.081(1) |
|       | 10   | 1.3664(8)                       | 0.48(2)                         | $6(1) \cdot 10^{-5}$   | 0.082(6) |

Field dependence of magnetization for were studied for complexes **8** and **16** and shown in Figures S38 and S39. The field dependencies of magnetization are nol-linear at low temperature and saturates in fields  $H > 15$  kOe at 2 K. The saturation magnetizations at magnetic field of 45 kOe are  $5.69 \mu_B$  for **8** and  $5.57 \mu_B$  for **16** and are lower

than a theoretical value of  $10 \mu_B$  for one  $Dy^{III}$  ion. The  $M(H/T)$  dependencies at different temperatures do not coincide, that imply anisotropy effects take place (Figure S38 *b*, S38 *b*).

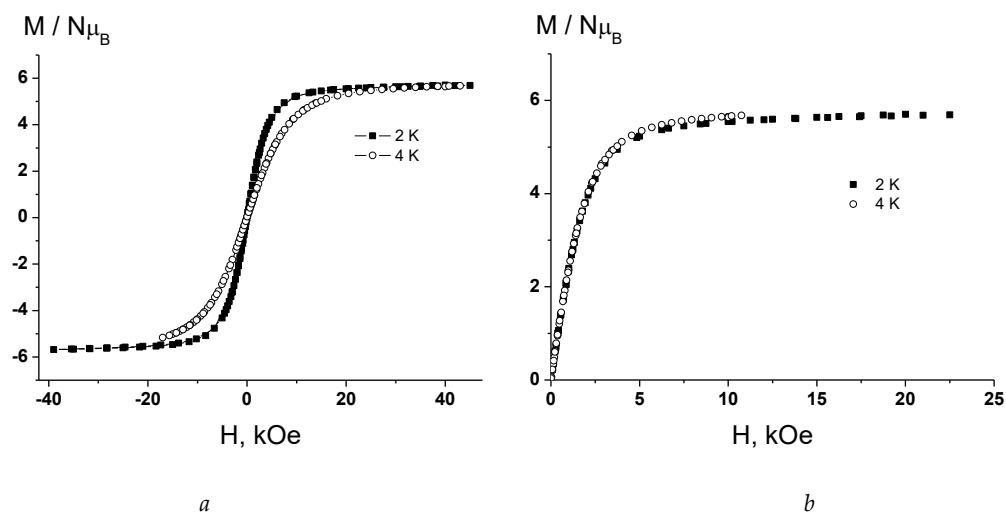

**Figure S38** Experimental dependencies of magnetization  $M$  vs  $H$  (a) and  $M$  vs  $(H/T)$  for complex 8.

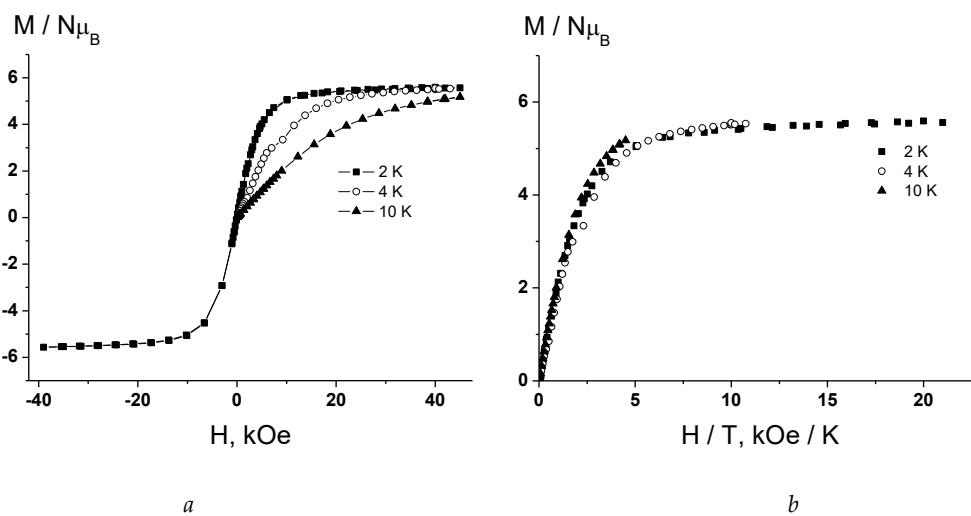

**Figure S39** Experimental dependencies of magnetization  $M$  vs  $H$  (a) and  $M$  vs  $(H/T)$  for complex 16.
